# Supplementary material for: Diastereoselective construction of 4-indole substituted chromans bearing a ketal motif through a three-component Friedel–Crafts alkylation/ketalization sequence
Source: Royal Society of Chemistry journal article supplement (doi:10.1039/c8ra02481b), 2018-01-01

## Supporting Information

### **Diastereoselective construction of 4-indole substituted chromans bearing a ketal motif through a three-component Friedel-Crafts alkylation/ketalization sequence**

Jiao-Mei Guo,<sup>#</sup> Wen-Bo Wang,<sup>#</sup> Jia Guo, Yan-Shuo Zhu, Xu-Guan Bai, Shao-Jing Jin, Qi-Lin

Wang\* and Zhan-Wei Bu\*

Institute of Functional Organic Molecular Engineering, College of Chemistry and Chemical Engineering, Henan University, Kaifeng 475004, China.

<sup>#</sup> These authors contribute equally to this work.

E-mail: wangqilin@henu.edu.cn; [buzhanwei@henu.edu.cn](mailto:buzhanwei@henu.edu.cn)

#### Table of Contents

|                                                                           |     |
|---------------------------------------------------------------------------|-----|
| 1. General methods.....                                                   | S2  |
| 2. Experimental data for 4-indole substituted chromans <b>3</b> .....     | S2  |
| 3. Experimental data for bis-indole substituted chromans <b>4-7</b> ..... | S16 |
| 4. Experimental data for derivations of <b>3n</b> and <b>3w</b> .....     | S19 |
| 5. Crystal data for <b>3o</b> .....                                       | S24 |
| 6. <sup>1</sup> H NMR and <sup>13</sup> C NMR spectra.....                | S26 |

## 1. General methods

NMR spectra were recorded with tetramethylsilane as the internal standard.  $^1\text{H}$  NMR spectra were recorded at 400 MHz, and  $^{13}\text{C}$  NMR spectra were recorded at 100 MHz (Bruker Avance).  $^1\text{H}$  NMR chemical shifts ( $\delta$ ) are reported in ppm relative to tetramethylsilane (TMS) with the solvent signal as the internal standard ( $\text{CDCl}_3$  at 7.26 ppm,  $(\text{CD}_3)_2\text{SO}$  at 2.50 ppm).  $^{13}\text{C}$  NMR chemical shifts are reported in ppm from tetramethylsilane (TMS) with the solvent resonance as the internal standard ( $\text{CDCl}_3$  at 77.00 ppm,  $(\text{CD}_3)_2\text{SO}$  at 39.52 ppm). Data are given as: s (singlet), d (doublet), t (triplet), q (quartet), dd (double of doublet), br (broad) or m (multiplets), coupling constants (Hz) and integration. Flash column chromatography was carried out using silica gel eluting with ethyl acetate and petroleum ether. High resolution mass spectra were obtained with the Q-TOF-Premier mass spectrometer. Reactions were monitored by TLC and visualized with ultraviolet light. IR spectra were recorded on a Thermo Fisher Nicolet Avatar 360 FTIR spectrometer on a KBr beam splitter. All the solvents were used directly without any purification.

## 2. Experimental data for 4-indole substituted chromans 3

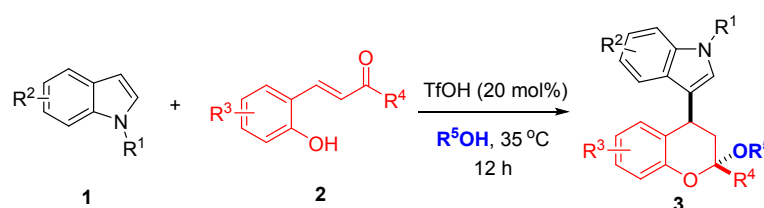

**General procedure:** To a 5.0 mL vial were successively added indole **1** (0.24 mmol), *ortho*-hydroxychalcone **2** (0.20 mmol), TfOH (6.0 mg, 0.04 mmol) and 1.0 mL alcohol. The resulting mixture was stirred at 35 °C for 12 h. For all cases, the precipitate was generated from the homogenous reaction system, and only a simple filtration was needed to purify them.

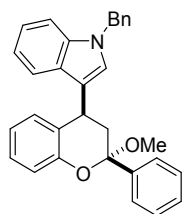

### 1-benzyl-3-(2-methoxy-2-phenylchroman-4-yl)-1*H*-indole (**3a**)

White solid; 86.2 mg, 97% yield; Reaction time = 12 h; mp 148.5-149.8 °C;  $^1\text{H}$  NMR (400 MHz,  $\text{CDCl}_3$ ),  $\delta$  7.65 (d,  $J = 8.0$  Hz, 2H), 7.42-7.32 (m, 4H), 7.26-6.96 (m, 12H), 6.82 (t,  $J = 8.0$  Hz, 1H), 5.25 (s, 2H), 4.82 (dd,  $J_1 = 8.0$  Hz,  $J_2 = 4.0$  Hz, 1H), 3.17 (s, 3H), 2.52 (dd,  $J_1 = J_2 = 5.6$  Hz,

1H), 2.31 (t,  $J = 13.2$  Hz, 1H);  $^{13}\text{C}$  NMR (100 MHz,  $\text{CDCl}_3$ )  $\delta$  152.1, 141.2, 137.6, 137.1, 129.1, 128.8, 128.4, 128.2, 127.6, 127.5, 127.4, 126.8, 126.7, 126.5, 126.3, 121.8, 121.3, 120.0, 119.1, 117.1, 117.0, 109.9, 100.7, 50.4, 50.0, 42.8, 30.2. IR (KBr)  $\nu$  3441, 3060, 3029, 2958, 2935, 2826, 1608, 1580, 1487, 1456, 1365, 1335, 1154, 1045, 1019, 908, 737, 699  $\text{cm}^{-1}$ . HRMS (ESI) calcd for  $\text{C}_{28}\text{H}_{29}\text{NNaO}_2$   $[\text{M}+\text{Na}]^+$  468.1934, found 468.1936.

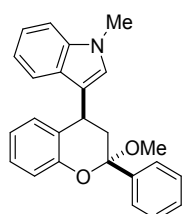

### 3-(2-methoxy-2-phenylchroman-4-yl)-1-methyl-1H-indole (**3b**)

White solid; 68.3 mg, 92% yield; Reaction time = 12 h; mp 71.9-73.9  $^{\circ}\text{C}$ ;  $^1\text{H}$  NMR (400 MHz,  $\text{CDCl}_3$ ),  $\delta$  7.57-7.55 (m, 2H), 7.31-7.28 (m, 2H), 7.25-7.22 (m, 2H), 7.16 (d,  $J = 8.0$  Hz, 1H), 7.07-7.00 (m, 3H), 6.95-6.86 (m, 2H), 6.81 (s, 1H), 6.72-6.70 (s, 1H), 4.74-4.70 (m, 1H), 3.59 (s, 3H), 3.08 (s, 3H), 2.44-2.39 (m, 1H), 2.24-2.17 (m, 1H);  $^{13}\text{C}$  NMR (100 MHz,  $\text{CDCl}_3$ )  $\delta$  152.1, 141.2, 137.4, 129.2, 128.5, 128.2, 127.6, 127.4, 127.2, 126.7, 126.3, 121.6, 121.3, 119.9, 118.9, 117.2, 116.4, 109.4, 100.7, 50.4, 42.9, 32.7, 30.2. IR (KBr)  $\nu$  3425, 3058, 2935, 2831, 1721, 1612, 1582, 1483, 1452, 1236, 1155, 1045, 1019, 907, 743, 701  $\text{cm}^{-1}$ . HRMS (ESI) calcd for  $\text{C}_{25}\text{H}_{23}\text{NNaO}_2$   $[\text{M}+\text{Na}]^+$  392.1621, found 392.1607.

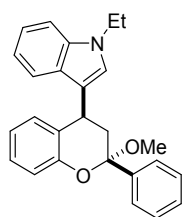

### 1-ethyl-3-(2-methoxy-2-phenylchroman-4-yl)-1H-indole (**3c**)

White solid; 72.2 mg, 94% yield; Reaction time = 12 h; mp 113.7-115.2  $^{\circ}\text{C}$ ;  $^1\text{H}$  NMR (400 MHz,  $\text{CDCl}_3$ ),  $\delta$  7.65 (d,  $J = 8.0$  Hz, 2H), 7.39-7.27 (m, 5H), 7.18-7.09 (m, 3H), 7.04 (d,  $J = 8.0$  Hz, 1H), 6.97-6.95 (m, 2H), 6.80 (t,  $J = 8.0$  Hz, 1H), 4.83 (dd,  $J_1 = J_2 = 5.6$  Hz, 1H), 4.05 (q,  $J = 6.4$  Hz, 2H), 3.17 (s, 3H), 2.52 (dd,  $J_1 = J_2 = 5.6$  Hz, 1H), 2.31 (t,  $J = 12.0$  Hz, 1H), 1.38 (t,  $J = 8.0$  Hz, 3H);  $^{13}\text{C}$  NMR (100 MHz,  $\text{CDCl}_3$ )  $\delta$  152.2, 141.3, 136.5, 129.3, 128.5, 128.3, 127.6, 127.5, 126.8, 126.4, 125.6, 121.6, 121.4, 120.1, 118.9, 117.2, 116.5, 109.5, 100.8, 50.5, 43.0, 40.9, 30.3, 15.6. IR (KBr)  $\nu$  3426, 3056, 2965, 2935, 2832, 1732, 1612, 1582, 1483, 1452, 1233, 1155, 1047, 1019,

908, 743, 703  $\text{cm}^{-1}$ . HRMS (ESI) calcd for  $\text{C}_{26}\text{H}_{25}\text{NNaO}_2$   $[\text{M}+\text{Na}]^+$  406.1778, found 406.1777.

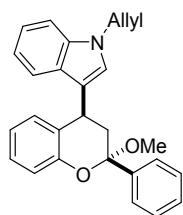

1-allyl-3-(2-methoxy-2-phenylchroman-4-yl)-1*H*-indole (**3d**)

White solid; 76.6 mg, 97% yield; Reaction time = 12 h; mp 136.1-138.4  $^{\circ}\text{C}$ ;  $^1\text{H}$  NMR (400 MHz,  $\text{CDCl}_3$ ),  $\delta$  7.57 (d,  $J = 8.0$  Hz, 2H), 7.33-7.17 (m, 5H), 7.11-7.06 (m, 2H), 7.02 (t,  $J = 8.0$  Hz, 1H), 6.94 (t,  $J = 8.0$  Hz, 1H), 6.89 (t,  $J = 8.0$  Hz, 2H), 6.72 (t,  $J = 8.0$  Hz, 1H), 5.91-5.81 (m, 1H), 5.07 (d,  $J = 10.4$  Hz, 1H), 4.95 (d,  $J = 16.0$  Hz, 1H), 4.73 (dd,  $J_1 = J_2 = 5.6$  Hz, 1H), 4.55 (d,  $J = 5.2$  Hz, 2H), 3.09 (s, 3H), 2.43 (dd,  $J_1 = J_2 = 5.6$  Hz, 1H), 2.22 (t,  $J = 13.2$  Hz, 1H);  $^{13}\text{C}$  NMR (100 MHz,  $\text{CDCl}_3$ )  $\delta$  152.1, 141.2, 136.9, 133.6, 129.2, 128.5, 128.2, 127.6, 127.4, 126.6, 126.4, 126.3, 121.7, 121.3, 120.0, 119.0, 117.3, 117.1, 116.8, 109.8, 100.7, 50.4, 48.8, 42.8, 30.1. IR (KBr)  $\nu$  3431, 3059, 2962, 2935, 2832, 1582, 1485, 1455, 1337, 1155, 1048, 1020, 912, 760, 738  $\text{cm}^{-1}$ . HRMS (ESI) calcd for  $\text{C}_{27}\text{H}_{25}\text{NNaO}_2$   $[\text{M}+\text{Na}]^+$  418.1778, found 418.1776.

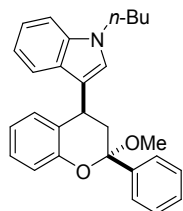

1-butyl-3-(2-methoxy-2-phenylchroman-4-yl)-1*H*-indole (**3e**)

White solid; 80.2 mg, 97% yield; Reaction time = 12 h; mp 145.1-146.5  $^{\circ}\text{C}$ ;  $^1\text{H}$  NMR (400 MHz,  $\text{CDCl}_3$ ),  $\delta$  7.57 (d,  $J = 8.0$  Hz, 2H), 7.31 (t,  $J = 8.0$  Hz, 2H), 7.27-7.20 (m, 3H), 7.11-7.00 (m, 3H), 6.95 (d,  $J = 8.0$  Hz, 1H), 6.89-6.86 (m, 2H), 6.72 (t,  $J = 8.0$  Hz, 1H), 4.73 (dd,  $J_1 = J_2 = 8.0$  Hz, 1H), 3.95 (t,  $J = 8.0$  Hz, 2H), 3.09 (s, 3H), 2.42 (dd,  $J_1 = J_2 = 5.6$  Hz, 1H), 2.21 (t,  $J = 13.2$  Hz, 1H), 1.72-1.64 (m, 2H), 1.26-1.14 (m, 2H), 0.82 (t,  $J = 4.0$  Hz, 3H);  $^{13}\text{C}$  NMR (100 MHz,  $\text{CDCl}_3$ )  $\delta$  152.1, 141.2, 136.7, 129.2, 128.4, 128.2, 127.5, 127.3, 126.7, 126.3, 121.4, 121.3, 119.9, 118.7, 117.1, 116.2, 109.6, 100.7, (one carbon missing in the aromatic region), 50.4, 46.1, 42.9, 32.4, 30.1, 20.3, 13.8. IR (KBr)  $\nu$  3431, 3058, 2964, 2933, 2830, 1580, 1482, 1451, 1342, 1154, 1050, 1015, 906, 758, 736  $\text{cm}^{-1}$ . HRMS (ESI) calcd for  $\text{C}_{28}\text{H}_{29}\text{NNaO}_2$   $[\text{M}+\text{Na}]^+$  434.2091, found 434.2098.

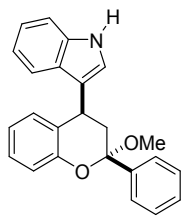

3-(2-methoxy-2-phenylchroman-4-yl)-1*H*-indole (**3f**)

White solid; 55.0 mg, 77% yield; Reaction time = 12 h; mp 188.3-189.4 °C; <sup>1</sup>H NMR (400 MHz, DMSO-*d*<sub>6</sub>), δ 11.0 (s, 1H), 7.64 (d, *J* = 8.0 Hz, 2H), 7.47 (t, *J* = 8.0 Hz, 2H), 7.41-7.35 (m, 3H), 7.17-7.08 (m, 3H), 7.03 (t, *J* = 8.0 Hz, 1H), 6.87-6.77 (m, 3H), 4.70 (dd, *J*<sub>1</sub> = *J*<sub>2</sub> = 8.0 Hz, 1H), 3.05 (s, 3H), 2.42 (dd, *J*<sub>1</sub> = 8.0 Hz, *J*<sub>2</sub> = 4.0 Hz, 1H), 2.28 (t, *J* = 13.2 Hz, 1H); <sup>13</sup>C NMR (100 MHz, DMSO-*d*<sub>6</sub>) δ 151.8, 140.9, 137.2, 129.0, 128.9, 128.8, 128.0, 127.1, 126.5, 126.4, 124.3, 121.6, 121.4, 119.2, 118.9, 117.4, 115.8, 112.2, 100.6, 50.2, 42.0, 30.1. IR (KBr) ν 3455, 3061, 3030, 2961, 2936, 2833, 1581, 1487, 1451, 1234, 1155, 1046, 1018, 907, 745, 702 cm<sup>-1</sup>. HRMS (ESI) calcd for C<sub>24</sub>H<sub>21</sub>NNaO<sub>2</sub> [M+Na]<sup>+</sup> 378.1465, found 378.1456.

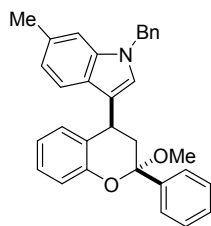

1-benzyl-3-(2-methoxy-2-phenylchroman-4-yl)-6-methyl-1*H*-indole (**3g**)

White solid; 85.5 mg, 93% yield; Reaction time = 12 h; mp 142.9-144.8 °C; <sup>1</sup>H NMR (400 MHz, CDCl<sub>3</sub>), δ 7.65 (d, *J* = 8.0 Hz, 2H), 7.40 (t, *J* = 8.0 Hz, 2H), 7.34 (d, *J* = 8.0 Hz, 1H), 7.30-7.16 (m, 5H), 7.10-7.04 (m, 5H), 6.95 (s, 1H), 6.82 (t, *J* = 4.0 Hz, 2H), 5.23 (s, 2H), 4.78 (dd, *J*<sub>1</sub> = *J*<sub>2</sub> = 4.0 Hz, 1H), 3.17 (s, 3H), 2.50 (dd, *J*<sub>1</sub> = 4.0 Hz, *J*<sub>2</sub> = 8.0 Hz, 1H), 2.39 (s, 3H), 2.30 (t, *J* = 12.0 Hz, 1H); <sup>13</sup>C NMR (100 MHz, CDCl<sub>3</sub>) δ 152.0, 141.1, 137.8, 137.5, 131.6, 129.1, 128.8, 128.4, 128.2, 127.5, 127.4, 126.7, 126.6, 126.3, 126.1, 125.2, 121.2, 120.8, 119.7, 117.1, 116.9, 109.8, 100.7, 50.4, 49.8, 42.8, 30.2, 21.9. IR (KBr) ν 3433, 3064, 3028, 2937, 2828, 1607, 1580, 1488, 1448, 1233, 1184, 1155, 1045, 1023, 762, 702 cm<sup>-1</sup>. HRMS (ESI) calcd for C<sub>32</sub>H<sub>29</sub>NNaO<sub>2</sub> [M+Na]<sup>+</sup> 482.2091, found 482.2067.

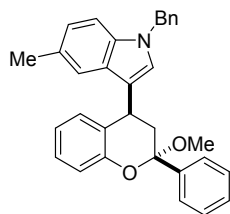

1-benzyl-3-(2-methoxy-2-phenylchroman-4-yl)-5-methyl-1*H*-indole (**3h**)

White solid; 87.2 mg, 95% yield; Reaction time = 12 h; mp 181.4-182.8 °C; <sup>1</sup>H NMR (400 MHz, CDCl<sub>3</sub>), δ 7.68-7.65 (m, 2H), 7.42-7.34 (m, 3H), 7.27-7.20 (m, 6H), 7.15-7.07 (m, 5H), 6.97 (d, *J* = 4.0 Hz, 1H), 6.84 (t, *J* = 8.0 Hz, 1H), 5.24 (s, 2H), 4.82-4.79 (m, 1H), 3.18 (d, *J* = 4.0 Hz, 3H), 2.55-2.49 (m, 1H), 2.36 (d, *J* = 4.0 Hz, 3H), 2.28 (t, *J* = 12.0 Hz, 1H); <sup>13</sup>C NMR (100 MHz, CDCl<sub>3</sub>) δ 152.0, 141.1, 137.7, 135.4, 129.0, 128.7, 128.4, 128.3, 128.2, 127.8, 127.5, 127.4, 126.7, 126.6, 126.3, 123.4, 121.2, 119.4, 117.0, 116.5, 116.4, 109.6, 100.6, 50.3, 50.0, 42.7, 29.9, 21.5. IR (KBr) ν 3425, 3063, 3031, 2933, 1616, 1582, 1487, 1450, 1230, 1162, 1045, 1024, 760, 702 cm<sup>-1</sup>. HRMS (ESI) calcd for C<sub>32</sub>H<sub>29</sub>NNaO<sub>2</sub> [M+Na]<sup>+</sup> 482.2091, found 482.2100.

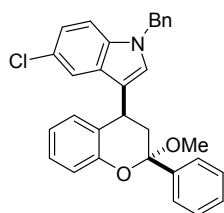

1-benzyl-5-chloro-3-(2-methoxy-2-phenylchroman-4-yl)-1*H*-indole (**3i**)

White solid; 87.1 mg, 91% yield; Reaction time = 12 h; mp 163.9-165.6 °C; <sup>1</sup>H NMR (400 MHz, CDCl<sub>3</sub>), δ 7.66 (d, *J* = 8.0 Hz, 2H), 7.42 (t, *J* = 8.0 Hz, 2H), 7.35 (t, *J* = 8.0 Hz, 2H), 7.27 (t, *J* = 8.0 Hz, 3H), 7.20 (t, *J* = 8.0 Hz, 1H), 7.15-7.04 (m, 6H), 7.00 (d, *J* = 8.0 Hz, 1H), 6.84 (t, *J* = 8.0 Hz, 1H), 5.24 (s, 2H), 4.77 (dd, *J*<sub>1</sub> = *J*<sub>2</sub> = 8.0 Hz, 1H), 3.17 (s, 3H), 2.49 (dd, *J*<sub>1</sub> = 8.0 Hz, *J*<sub>2</sub> = 4.0 Hz, 1H), 2.24 (t, *J* = 12.0 Hz, 1H); <sup>13</sup>C NMR (100 MHz, CDCl<sub>3</sub>) δ 151.6, 138.8, 137.6, 137.1, 135.2, 129.8, 129.0, 128.8, 127.6, 127.5, 127.3, 126.8, 126.5, 121.8, 121.3, 120.7, 120.1, 119.1, 117.0, 116.8, 109.8, 100.8, one carbon missing in the aromatic region, 50.4, 50.0, 38.9, 29.7. IR (KBr) ν 3429, 3065, 3031, 2960, 2938, 2831, 1580, 1458, 1347, 1236, 1156, 1024, 908, 758, 701 cm<sup>-1</sup>. HRMS (ESI) calcd for C<sub>31</sub>H<sub>26</sub>ClNNaO<sub>2</sub> [M+Na]<sup>+</sup> 502.1544, found 502.1553.

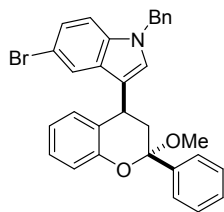

1-benzyl-5-bromo-3-(2-methoxy-2-phenylchroman-4-yl)-1*H*-indole (**3j**)

White solid; 101.8 mg, 97% yield; Reaction time = 12 h; mp 163.8-165.4 °C; <sup>1</sup>H NMR (400 MHz, CDCl<sub>3</sub>), δ 7.58 (d, *J* = 4.0 Hz, 2H), 7.43 (s, 1H), 7.34 (t, *J* = 8.0 Hz, 2H), 7.28 (d, *J* = 4.0 Hz, 1H), 7.20-7.11 (m, 5H), 7.02 (d, *J* = 8.0 Hz, 2H), 6.96 (d, *J* = 4.0 Hz, 2H), 6.92 (d, *J* = 8.0 Hz, 2H), 6.77 (t, *J* = 8.0 Hz, 1H), 5.15 (s, 2H), 4.70 (dd, *J*<sub>1</sub> = *J*<sub>2</sub> = 4.0 Hz, 1H), 3.09 (s, 3H), 2.42 (dd, *J*<sub>1</sub> = *J*<sub>2</sub> = 5.6 Hz, 1H), 2.15 (t, *J* = 12.0 Hz, 1H); <sup>13</sup>C NMR (100 MHz, CDCl<sub>3</sub>) δ 152.0, 140.9, 137.1, 135.6, 129.3, 128.9, 128.8, 128.4, 128.2, 127.9, 127.8, 127.7, 126.7, 126.3, 126.0, 124.7, 122.3, 121.3, 117.3, 116.8, 112.6, 111.4, 100.5, 50.3, 50.2, 42.7, 29.9. IR (KBr) ν 3430, 3067, 3031, 2936, 2835, 1608, 1581, 1477, 1450, 1355, 1308, 1157, 1046, 1022, 907, 759, 701 cm<sup>-1</sup>. HRMS (ESI) calcd for C<sub>31</sub>H<sub>26</sub>BrNNaO<sub>2</sub> [M+Na]<sup>+</sup> 546.1039, found 546.1036.

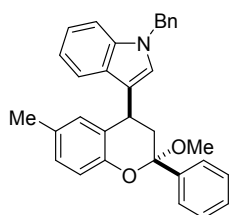

1-benzyl-3-(2-methoxy-6-methyl-2-phenylchroman-4-yl)-1*H*-indole (**3k**)

White solid; 87.6 mg, 95% yield; Reaction time = 12 h; mp 175.0-176.3 °C; <sup>1</sup>H NMR (400 MHz, CDCl<sub>3</sub>), δ 7.66 (t, *J* = 8.0 Hz, 2H), 7.43-7.38 (m, 3H), 7.35-7.23 (m, 5H), 7.17-7.08 (m, 3H), 7.02 (q, *J* = 8.0 Hz, 4H), 6.87 (d, *J* = 8.0 Hz, 1H), 5.27 (d, *J* = 4.0 Hz, 2H), 4.83-4.76 (m, 1H), 3.17 (d, *J* = 4.0 Hz, 3H), 2.54-2.47 (m, 1H), 2.33-2.24 (m, 1H), 2.14 (d, *J* = 8.0 Hz, 3H); <sup>13</sup>C NMR (100 MHz, CDCl<sub>3</sub>) δ 149.9, 141.2, 137.6, 137.0, 130.4, 129.3, 128.8, 128.4, 128.2, 128.1, 127.6, 127.5, 126.8, 126.7, 126.3, 126.2, 121.7, 120.0, 119.1, 117.3, 116.9, 109.8, 100.5, 50.3, 50.0, 43.1, 30.1, 20.8. IR (KBr) ν 3402, 3029, 2930, 2835, 1608, 1490, 1456, 1341, 1237, 1157, 1045, 927, 736, 708 cm<sup>-1</sup>. HRMS (ESI) calcd for C<sub>32</sub>H<sub>29</sub>NNaO<sub>2</sub> [M+Na]<sup>+</sup> 482.2091, found 482.2100.

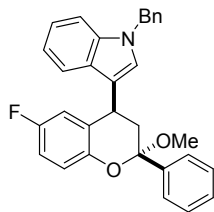

1-benzyl-3-(6-fluoro-2-methoxy-2-phenylchroman-4-yl)-1*H*-indole (**3l**)

White solid; 90.7 mg, 98% yield; Reaction time = 12 h; mp 148.1-149.6 °C; <sup>1</sup>H NMR (400 MHz, CDCl<sub>3</sub>), δ 7.55 (d, *J* = 8.0 Hz, 2H), 7.32-7.10 (m, 8H), 7.05-6.89 (m, 6H), 6.77 (d, *J* = 8.0 Hz, 1H), 6.66 (d, *J* = 8.0 Hz, 1H), 5.16 (s, 2H), 4.67 (s, 1H), 3.06 (s, 3H), 2.42-2.39 (m, 1H), 2.24-2.17 (m, 1H); <sup>13</sup>C NMR (100 MHz, CDCl<sub>3</sub>) δ 157.5 (d, *J* = 237.0 Hz, 1C), 148.0 (d, *J* = 2.0 Hz, 1C), 140.8, 137.5, 132.2, 128.9, 128.5, 128.3, 128.1 (d, *J* = 7.0 Hz, 1C), 127.7, 127.1, 126.8, 126.7, 126.3, 122.0, 119.9, 119.3, 118.4 (d, *J* = 8.0 Hz, 1C), 116.4, 115.2 (d, *J* = 23.0 Hz, 1C), 114.35 (d, *J* = 24.0 Hz, 1C), 110.0, 100.7, 50.4, 50.2, 42.4, 30.5. IR (KBr) ν 3429, 3038, 2936, 2832, 1615, 1488, 1249, 1187, 1153, 1020, 933, 739, 700 cm<sup>-1</sup>. HRMS (ESI) calcd for C<sub>31</sub>H<sub>26</sub>FNNaO<sub>2</sub> [M+Na]<sup>+</sup> 486.1840, found 486.1850.

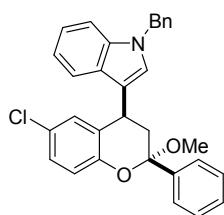

1-benzyl-3-(6-chloro-2-methoxy-2-phenylchroman-4-yl)-1*H*-indole (**3m**)

White solid; 93.6 mg, 98% yield; Reaction time = 12 h; mp 145.3-147.2 °C; <sup>1</sup>H NMR (400 MHz, CDCl<sub>3</sub>), δ 7.63 (d, *J* = 8.0 Hz, 2H), 7.43-7.34 (m, 4H), 7.31-7.25 (m, 4H), 7.17-7.09 (m, 4H), 7.04-7.02 (m, 4H), 5.29 (s, 2H), 4.78 (dd, *J*<sub>1</sub> = *J*<sub>2</sub> = 4.0 Hz, 1H), 3.16 (s, 3H), 2.53-2.47 (m, 1H), 2.29 (t, *J* = 12.0 Hz, 1H); <sup>13</sup>C NMR (100 MHz, CDCl<sub>3</sub>) δ 150.7, 140.6, 137.5, 137.1, 128.8, 128.7, 128.4, 128.3, 127.7, 127.6, 127.1, 126.8, 126.7, 126.2, 126.1, 121.9, 119.7, 119.2, 118.5, 116.2, 109.9, 100.9, 50.4, 50.0, 42.4, 30.2. IR (KBr) ν 3429, 3058, 3029, 2938, 2836, 1475, 1342, 1247, 1155, 1039, 1019, 909, 742, 705 cm<sup>-1</sup>. HRMS (ESI) calcd for C<sub>31</sub>H<sub>26</sub>ClNNaO<sub>2</sub> [M+Na]<sup>+</sup> 502.1544, found 502.1546.



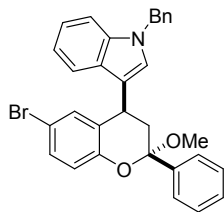

1-benzyl-3-(6-bromo-2-methoxy-2-phenylchroman-4-yl)-1*H*-indole (**3n**)

White solid; 100.9 mg, 96% yield; Reaction time = 12 h; mp 171.1-172.4 °C; <sup>1</sup>H NMR (400 MHz, CDCl<sub>3</sub>), δ 7.62 (d, *J* = 8.0 Hz, 2H), 7.42-7.25 (m, 10H), 7.14 (d, *J* = 8.0 Hz, 2H), 7.09 (d, *J* = 8.0 Hz, 2H), 7.03-6.97 (m, 2H), 5.28 (s, 2H), 4.78 (dd, *J*<sub>1</sub> = *J*<sub>2</sub> = 4.0 Hz, 1H), 3.15 (s, 3H), 2.50 (dd, *J*<sub>1</sub> = 4.0 Hz, *J*<sub>2</sub> = 8.0 Hz, 1H), 2.28 (t, *J* = 12.0 Hz, 1H); <sup>13</sup>C NMR (100 MHz, CDCl<sub>3</sub>) δ 151.3, 140.6, 137.5, 137.1, 131.6, 130.5, 129.0, 128.8, 128.4, 128.3, 127.7, 127.1, 126.8, 126.8, 126.2, 121.9, 119.7, 119.3, 119.0, 116.2, 113.6, 109.9, 100.9, 50.4, 50.0, 42.5, 30.2. IR (KBr) ν 3427, 3057, 3029, 2938, 2836, 1473, 1342, 1247, 1156, 1039, 1019, 908, 741, 703 cm<sup>-1</sup>. HRMS (ESI) calcd for C<sub>31</sub>H<sub>26</sub>BrNNaO<sub>2</sub> [M+Na]<sup>+</sup> 546.1039, found 546.1045.

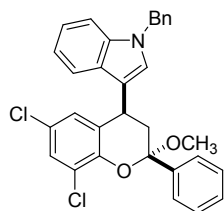

1-benzyl-3-(6,8-dichloro-2-methoxy-2-phenylchroman-4-yl)-1*H*-indole (**3o**)

White solid; 100.0 mg, 97% yield; Reaction time = 12 h; mp 186.2-187.7 °C; <sup>1</sup>H NMR (400 MHz, CDCl<sub>3</sub>), δ 7.70-7.67 (m, 2H), 7.43 (t, *J* = 8.0 Hz, 2H), 7.38-7.25 (m, 7H), 7.16 (t, *J* = 8.0 Hz, 1H), 7.10 (d, *J* = 8.0 Hz, 2H), 7.03 (t, *J* = 8.0 Hz, 2H), 6.93-6.90 (m, 1H), 5.29 (s, 2H), 4.79 (dd, *J*<sub>1</sub> = *J*<sub>2</sub> = 4.0 Hz, 1H), 3.15 (s, 3H), 2.60-2.54 (m, 1H), 2.37-2.31 (m, 1H); <sup>13</sup>C NMR (100 MHz, CDCl<sub>3</sub>) δ 146.6, 139.9, 137.4, 137.1, 129.7, 128.8, 128.5, 128.4, 127.9, 127.7, 127.3, 126.9, 126.8, 126.3, 126.2, 125.7, 123.1, 122.0, 119.7, 119.4, 115.7, 110.0, 101.4, 50.5, 50.0, 42.0, 30.5. IR (KBr) ν 3427, 3032, 2938, 2832, 1452, 1341, 1255, 1154, 1021, 974, 922, 741, 699 cm<sup>-1</sup>. HRMS (ESI) calcd for C<sub>31</sub>H<sub>25</sub>Cl<sub>2</sub>NNaO<sub>2</sub> [M+Na]<sup>+</sup> 536.1155, found 536.1156.

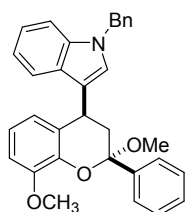

1-benzyl-3-(2,8-dimethoxy-2-phenylchroman-4-yl)-1*H*-indole (**3p**)

White solid; 89.7 mg, 94% yield; Reaction time = 12 h; mp 155.1-156.8 °C; <sup>1</sup>H NMR (400 MHz, CDCl<sub>3</sub>), δ 7.61 (d, *J* = 8.0 Hz, 2H), 7.33-7.12 (m, 8H), 7.01 (dd, *J*<sub>1</sub> = 4.0 Hz, *J*<sub>2</sub> = 8.0 Hz, 3H), 6.90 (dd, *J*<sub>1</sub> = 4.0 Hz, *J*<sub>2</sub> = 8.0 Hz, 2H), 6.72 (d, *J* = 8.0 Hz, 1H), 6.67 (t, *J* = 8.0 Hz, 1H), 6.58 (d, *J* = 8.0 Hz, 1H), 5.15 (s, 2H), 4.74 (dd, *J*<sub>1</sub> = 4.0 Hz, *J*<sub>2</sub> = 8.0 Hz, 1H), 3.84 (s, 3H), 3.10 (s, 3H), 2.45 (dd, *J*<sub>1</sub> = 4.0 Hz, *J*<sub>2</sub> = 8.0 Hz, 1H), 2.24 (t, *J* = 12.0 Hz, 1H); <sup>13</sup>C NMR (100 MHz, CDCl<sub>3</sub>) δ 147.8, 140.5, 140.0, 136.5, 135.9, 127.7, 127.3, 127.1, 126.5, 126.3, 125.7, 125.6, 125.3, 120.7, 119.9, 119.3, 118.9, 117.9, 116.1, 109.2, 108.7, 99.5, one carbon missing in the aromatic region, 55.3, 49.3, 48.9, 41.6, 29.2. IR (KBr) ν 3431, 3036, 2936, 2833, 1586, 1467, 1339, 1264, 1212, 1158, 1045, 1023, 945, 738, 704 cm<sup>-1</sup>. HRMS (ESI) calcd for C<sub>32</sub>H<sub>29</sub>NNaO<sub>3</sub> [M+Na]<sup>+</sup> 498.2040, found 498.2054.

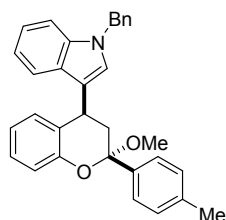

1-benzyl-3-(2-methoxy-2-(p-tolyl)chroman-4-yl)-1*H*-indole (**3q**)

White solid; 88.8 mg, 97% yield; Reaction time = 12 h; mp 168.2-169.3 °C; <sup>1</sup>H NMR (400 MHz, CDCl<sub>3</sub>), δ 7.46 (d, *J* = 8.0 Hz, 2H), 7.29 (d, *J* = 8.0 Hz, 1H), 7.22-7.07 (m, 8H), 7.05-7.00 (m, 3H), 6.98-6.89 (m, 3H), 6.74 (t, *J* = 8.0 Hz, 1H), 5.19 (s, 2H), 4.73 (dd, *J*<sub>1</sub> = 8.0 Hz, *J*<sub>2</sub> = 4.0 Hz, 1H), 3.09 (s, 3H), 2.43 (dd, *J*<sub>1</sub> = 8.0 Hz, *J*<sub>2</sub> = 4.0 Hz, 1H), 2.29 (s, 3H), 2.22 (t, *J* = 12.0 Hz, 1H); <sup>13</sup>C NMR (100 MHz, CDCl<sub>3</sub>) δ 151.0, 137.1, 136.8, 136.5, 135.9, 128.0, 127.9, 127.7, 127.4, 126.8, 126.5, 126.4, 125.7, 125.6, 125.5, 125.1, 120.7, 120.1, 118.9, 118.0, 116.0, 108.7, 99.6, 49.2, 48.9, 41.7, 29.0, 20.1. IR (KBr) ν 3431, 3030, 2927, 1615, 1453, 1343, 1264, 1222, 1154, 1103, 1023, 977, 908, 812, 732 cm<sup>-1</sup>. HRMS (ESI) calcd for C<sub>32</sub>H<sub>29</sub>NNaO<sub>2</sub> [M+Na]<sup>+</sup> 482.2091, found 482.2086.

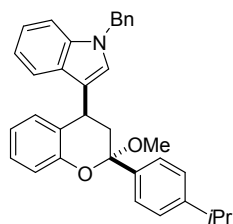

1-benzyl-3-(2-(4-isopropylphenyl)-2-methoxychroman-4-yl)-1*H*-indole (**3r**)

White solid; 85.4 mg, 88% yield; Reaction time = 12 h; mp 173.5-174.4 °C; <sup>1</sup>H NMR (400 MHz, CDCl<sub>3</sub>), δ 7.48 (d, *J* = 8.0 Hz, 2H), 7.28 (d, *J* = 8.0 Hz, 1H), 7.17 (t, *J* = 8.0 Hz, 6H), 7.12-6.90 (m, 8H), 6.74 (t, *J* = 8.0 Hz, 1H), 5.18 (s, 2H), 4.73 (dd, *J*<sub>1</sub> = 8.0 Hz, *J*<sub>2</sub> = 4.0 Hz, 1H), 3.11 (s, 3H), 2.88-2.81 (m, 1H), 2.43 (dd, *J*<sub>1</sub> = 4.0 Hz, *J*<sub>2</sub> = 8.0 Hz, 1H), 2.23 (t, *J* = 12.0 Hz, 1H), 1.18 (d, *J* = 8.0 Hz, 6H); <sup>13</sup>C NMR (100 MHz, CDCl<sub>3</sub>) δ 152.1, 148.8, 138.5, 137.6, 137.0, 129.1, 128.8, 128.7, 127.6, 127.5, 127.4, 126.8, 126.7, 126.6, 126.4, 126.2, 121.8, 121.2, 120.0, 119.0, 117.1, 109.8, 100.7, 50.3, 50.0, 42.8, 33.9, 30.1, 24.1. IR (KBr) ν 3435, 3033, 2963, 1582, 1480, 1456, 1340, 1264, 1220, 1156, 1107, 1025, 968, 908, 834, 736 cm<sup>-1</sup>. HRMS (ESI) calcd for C<sub>34</sub>H<sub>33</sub>NNaO<sub>2</sub> [M+Na]<sup>+</sup> 510.2404, found 510.2407.

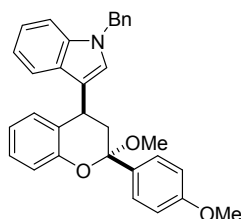

1-benzyl-3-(2-methoxy-2-(4-methoxyphenyl)chroman-4-yl)-1*H*-indole (**3s**)

White solid; 85.8 mg, 90% yield; Reaction time = 12 h; mp 81.1-82.9 °C; <sup>1</sup>H NMR (400 MHz, CDCl<sub>3</sub>), δ 7.50 (t, *J* = 8.0 Hz, 2H), 7.29 (t, *J* = 8.0 Hz, 1H), 7.19-6.84 (m, 14H), 6.74 (t, *J* = 8.0 Hz, 1H), 5.19 (s, 2H), 4.74 (s, 1H), 3.74 (d, *J* = 4.0 Hz, 3H), 3.09 (d, *J* = 8.0 Hz, 3H), 2.47-2.41 (m, 1H), 2.27-2.18 (m, 1H); <sup>13</sup>C NMR (100 MHz, CDCl<sub>3</sub>) δ 159.5, 152.1, 137.6, 137.0, 133.3, 129.1, 128.8, 127.6, 127.5, 127.5, 127.5, 127.4, 126.8, 126.7, 126.6, 121.8, 121.2, 120.0, 119.1, 117.1, 113.7, 109.9, 100.6, 55.3, 50.2, 50.0, 42.9, 30.2. IR (KBr) ν 3424, 3032, 2933, 2834, 1609, 1582, 1485, 1458, 1337, 1306, 1252, 1171, 1024, 970, 905, 835, 741 cm<sup>-1</sup>. HRMS (ESI) calcd for C<sub>32</sub>H<sub>29</sub>NNaO<sub>3</sub> [M+Na]<sup>+</sup> 498.2040, found 498.2030.

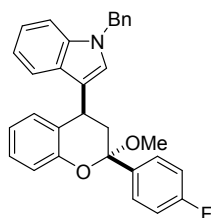

1-benzyl-3-(2-(4-fluorophenyl)-2-methoxychroman-4-yl)-1*H*-indole (**3t**)

White solid; 91.7 mg, 99% yield; Reaction time = 12 h; mp 137.9-139.6 °C; <sup>1</sup>H NMR (400 MHz, CDCl<sub>3</sub>), δ 7.53 (t, *J* = 8.0 Hz, 2H), 7.25 (d, *J* = 8.0 Hz, 1H), 7.17 (t, *J* = 8.0 Hz, 4H), 7.12-6.88 (m, 10H), 6.74 (t, *J* = 8.0 Hz, 1H), 5.16 (s, 2H), 4.72 (dd, *J*<sub>1</sub> = *J*<sub>2</sub> = 4.0 Hz, 1H), 3.07 (s, 3H), 2.41 (dd,

$J_1 = 4.0$  Hz,  $J_2 = 8.0$  Hz, 1H), 2.20 (t,  $J = 12.0$  Hz, 1H);  $^{13}\text{C}$  NMR (100 MHz,  $\text{CDCl}_3$ )  $\delta$  162.7 (d,  $J = 245.0$  Hz, 1C), 151.9, 137.6, 137.1, 129.1, 128.8, 128.3, 128.2, 127.7, 127.6, 127.4, 126.8, 126.7, 126.4, 121.9, 121.4, 120.0, 119.1, 117.1, 116.9, 115.3 (d,  $J = 21.0$  Hz, 1C), 109.9, 100.4, 50.3, 50.0, 42.9, 30.2. IR (KBr)  $\nu$  3427, 3061, 3032, 2935, 2834, 1607, 1507, 1485, 1457, 1337, 1264, 1225, 1155, 1106, 1044, 1021, 908, 838, 809, 738, 698  $\text{cm}^{-1}$ . HRMS (ESI) calcd for  $\text{C}_{31}\text{H}_{26}\text{FNNaO}_2$   $[\text{M}+\text{Na}]^+$  486.1840, found 486.1839.

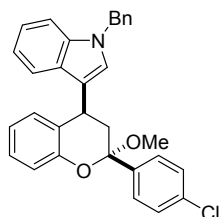

1-benzyl-3-(2-(4-chlorophenyl)-2-methoxychroman-4-yl)-1H-indole (**3u**)

White solid; 89.1 mg, 93% yield; Reaction time = 12 h; mp 157.4-158.8  $^{\circ}\text{C}$ ;  $^1\text{H}$  NMR (400 MHz,  $\text{CDCl}_3$ ),  $\delta$  7.50 (d,  $J = 8.0$  Hz, 2H), 7.27 (dd,  $J_1 = J_2 = 8.0$  Hz, 4H), 7.20-7.14 (m, 4H), 7.12-6.88 (m, 9H), 6.74 (t,  $J = 8.0$  Hz, 1H), 5.16 (s, 2H), 4.72 (dd,  $J_1 = J_2 = 4.0$  Hz, 1H), 3.06 (s, 3H), 2.39 (dd,  $J_1 = 8.0$  Hz,  $J_2 = 4.0$  Hz, 1H), 2.19 (t,  $J = 12.0$  Hz, 1H);  $^{13}\text{C}$  NMR (100 MHz,  $\text{CDCl}_3$ )  $\delta$  150.7, 138.6, 136.5, 136.0, 133.0, 128.0, 127.7, 127.5, 127.4, 126.8, 126.5, 126.2, 125.7, 125.6, 125.3, 120.8, 120.3, 118.8, 118.0, 116.0, 115.7, 108.8, 99.2, 49.2, 48.9, 41.6, 29.0. IR (KBr)  $\nu$  3431, 3059, 3032, 2931, 2834, 1607, 1585, 1484, 1455, 1341, 1263, 1219, 1156, 1099, 1050, 1019, 969, 910, 815, 731  $\text{cm}^{-1}$ . HRMS (ESI) calcd for  $\text{C}_{31}\text{H}_{26}\text{ClINaO}_2$   $[\text{M}+\text{Na}]^+$  502.1544, found 502.1555.

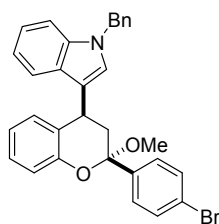

1-benzyl-3-(2-(4-bromophenyl)-2-methoxychroman-4-yl)-1H-indole (**3v**)

White solid; 95.7 mg, 91% yield; Reaction time = 12 h; mp 163.4-164.6  $^{\circ}\text{C}$ ;  $^1\text{H}$  NMR (400 MHz,  $\text{CDCl}_3$ ),  $\delta$  7.44 (s, 4H), 7.25 (d,  $J = 8.0$  Hz, 1H), 7.21-7.14 (m, 4H), 7.10-6.88 (m, 8H), 6.75 (t,  $J = 8.0$  Hz, 1H), 5.18 (s, 2H), 4.72 (dd,  $J_1 = J_2 = 4.0$  Hz, 1H), 3.07 (s, 3H), 2.39 (dd,  $J_1 = 8.0$  Hz,  $J_2 = 4.0$  Hz, 1H), 2.19 (t,  $J = 12.0$  Hz, 1H);  $^{13}\text{C}$  NMR (100 MHz,  $\text{CDCl}_3$ )  $\delta$  150.7, 139.2, 136.5, 136.0, 130.5, 128.0, 127.7, 127.1, 126.6, 126.5, 126.2, 125.7, 125.6, 125.3, 121.3, 120.8, 120.3, 118.8, 118.0, 116.0, 115.7, 108.8, 99.2, 49.2, 48.9, 41.5, 29.0. IR (KBr)  $\nu$  3433, 3033, 2963, 1585, 1481,

1457, 1339, 1262, 1206, 1158, 1101, 1040, 805, 745  $\text{cm}^{-1}$ . HRMS (ESI) calcd for  $\text{C}_{31}\text{H}_{26}\text{BrNNaO}_2$   $[\text{M}+\text{Na}]^+$  546.1039, found 546.1052.

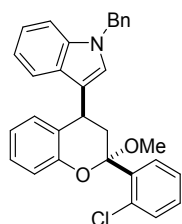

1-benzyl-3-(2-(2-chlorophenyl)-2-methoxychroman-4-yl)-1*H*-indole (**3w**)

White solid; 82.8 mg, 86% yield; Reaction time = 12 h; mp 179.3-180.8 °C;  $^1\text{H}$  NMR (400 MHz,  $\text{CDCl}_3$ ),  $\delta$  7.89 (d,  $J = 8.0$  Hz, 1H), 7.31 (t,  $J = 4.0$  Hz, 1H), 7.27-7.13 (m, 7H), 7.11-6.97 (m, 7H), 6.91 (d,  $J = 8.0$  Hz, 1H), 6.76 (d,  $J = 4.0$  Hz, 1H), 5.19 (s, 2H), 4.74 (dd,  $J_1 = J_2 = 4.0$  Hz, 1H), 3.14 (s, 3H), 2.87 (dd,  $J_1 = 4.0$  Hz,  $J_2 = 8.0$  Hz, 1H), 2.31-2.23 (m, 1H);  $^{13}\text{C}$  NMR (100 MHz,  $\text{CDCl}_3$ )  $\delta$  151.6, 137.6, 137.3, 137.1, 132.1, 131.6, 129.7, 129.6, 129.0, 128.8, 127.6, 127.5, 126.9, 126.8, 126.6, 121.8, 121.3, 120.1, 119.1, 117.0, 116.9, 109.9, 100.5, 50.4, 50.0, 38.8, 29.7. IR (KBr)  $\nu$  3420, 3060, 2934, 1583, 1486, 1458, 1338, 1264, 1235, 1158, 1043, 1015, 906, 758, 744  $\text{cm}^{-1}$ . HRMS (ESI) calcd for  $\text{C}_{31}\text{H}_{26}\text{ClNNaO}_2$   $[\text{M}+\text{Na}]^+$  502.1544, found 502.1558.

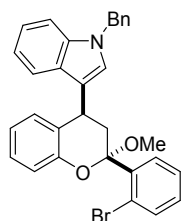

1-benzyl-3-(2-(2-bromophenyl)-2-methoxychroman-4-yl)-1*H*-indole (**3x**)

White solid; 101.6 mg, 97% yield; Reaction time = 12 h; mp 125.5-127.1 °C;  $^1\text{H}$  NMR (400 MHz,  $\text{CDCl}_3$ ),  $\delta$  7.96 (d,  $J = 8.0$  Hz, 1H), 7.63 (d,  $J = 8.0$  Hz, 1H), 7.41-7.36 (m, 2H), 7.31-7.24 (m, 4H), 7.20-7.18 (m, 2H), 7.12 (dd,  $J_1 = 4.0$  Hz,  $J_2 = 8.0$  Hz, 4H), 7.06 (t,  $J = 8.0$  Hz, 2H), 6.99 (t,  $J = 8.0$  Hz, 1H), 6.83 (t,  $J = 8.0$  Hz, 1H), 5.28 (s, 2H), 4.81 (dd,  $J_1 = 8.0$  Hz,  $J_2 = 4.0$  Hz, 1H), 3.22 (s, 3H), 2.92 (dd,  $J_1 = 8.0$  Hz,  $J_2 = 4.0$  Hz, 1H), 2.38 (t,  $J = 12.0$  Hz, 1H);  $^{13}\text{C}$  NMR (100 MHz,  $\text{CDCl}_3$ )  $\delta$  152.0, 140.9, 137.1, 135.4, 128.9, 128.8, 128.5, 128.4, 128.2, 128.0, 127.8, 127.7, 126.7, 126.3, 126.0, 124.9, 122.1, 121.3, 119.2, 117.2, 116.8, 110.9, 100.5, 50.3, 50.2, 42.7, 30.0. IR (KBr)  $\nu$  3440, 3061, 3030, 2961, 2933, 2829, 1584, 1487, 1458, 1337, 1265, 1235, 1207, 1157, 1117, 1038, 1012, 966, 906, 813, 744  $\text{cm}^{-1}$ . HRMS (ESI) calcd for  $\text{C}_{31}\text{H}_{26}\text{BrNNaO}_2$   $[\text{M}+\text{Na}]^+$  546.1039, found 546.1020.

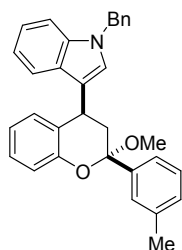

1-benzyl-3-(2-methoxy-2-(m-tolyl)chroman-4-yl)-1*H*-indole (**3y**)

White solid; 85.5 mg, 93% yield; Reaction time = 12 h; mp 149.0-150.9 °C; <sup>1</sup>H NMR (400 MHz, CDCl<sub>3</sub>), δ 7.45 (d, *J* = 8.0 Hz, 2H), 7.27 (d, *J* = 4.0 Hz, 2H), 7.17-7.10 (m, 6H), 7.03-6.95 (m, 5H), 6.91 (d, *J* = 12.0 Hz, 2H), 6.72 (t, *J* = 8.0 Hz, 1H), 5.15 (s, 2H), 4.73 (dd, *J*<sub>1</sub> = 4.0 Hz, *J*<sub>2</sub> = 8.0 Hz, 1H), 3.08 (s, 3H), 2.42 (dd, *J*<sub>1</sub> = 8.0 Hz, *J*<sub>2</sub> = 4.0 Hz, 1H), 2.27 (s, 3H), 2.21 (t, *J* = 12.0 Hz, 1H); <sup>13</sup>C NMR (100 MHz, CDCl<sub>3</sub>) δ 151.0, 137.1, 136.8, 136.5, 135.9, 128.0, 127.9, 127.7, 127.4, 126.7, 126.6, 126.5, 126.4, 125.7, 125.6, 125.5, 125.1, 123.6, 120.7, 120.1, 118.9, 118.0, 116.0, 108.7, 99.6, 49.2, 48.9, 41.7, 29.0, 20.1. IR (KBr) ν 3431, 3032, 2932, 1730, 1611, 1481, 1457, 1340, 1264, 1235, 1157, 1107, 1042, 1023, 971, 906, 816, 742 cm<sup>-1</sup>. HRMS (ESI) calcd for C<sub>32</sub>H<sub>29</sub>NNaO<sub>2</sub> [M+Na]<sup>+</sup> 482.2091, found 482.2072.

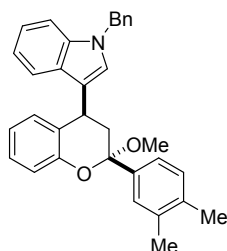

1-benzyl-3-(2-(3,4-dimethylphenyl)-2-methoxychroman-4-yl)-1*H*-indole (**3z**)

White solid; 92.9 mg, 98% yield; Reaction time = 12 h; mp 123.7-125.6 °C; <sup>1</sup>H NMR (400 MHz, CDCl<sub>3</sub>), δ 7.34 (s, 1H), 7.30 (d, *J* = 8.0 Hz, 2H), 7.22-7.14 (m, 4H), 7.10-6.89 (m, 9H), 6.72 (t, *J* = 8.0 Hz, 1H), 5.19 (s, 2H), 4.73 (dd, *J*<sub>1</sub> = *J*<sub>2</sub> = 4.0 Hz, 1H), 3.10 (s, 3H), 2.43 (dd, *J*<sub>1</sub> = 8.0 Hz, *J*<sub>2</sub> = 4.0 Hz, 1H), 2.25-2.18 (m, 7H); <sup>13</sup>C NMR (100 MHz, CDCl<sub>3</sub>) δ 151.1, 137.5, 136.5, 135.9, 135.5, 135.4, 128.6, 128.0, 127.7, 126.5, 126.4, 126.3, 125.7, 125.6, 125.5, 122.6, 120.7, 120.1, 118.9, 117.9, 116.1, 116.0, 115.9, 108.7, 99.6, 49.2, 48.9, 41.8, 29.0, 18.9, 18.5. IR (KBr) ν 3431, 3057, 3029, 2957, 2930, 2832, 1610, 1580, 1483, 1454, 1337, 1264, 1232, 1156, 1048, 1029, 909, 806, 737 cm<sup>-1</sup>. HRMS (ESI) calcd for C<sub>33</sub>H<sub>31</sub>NNaO<sub>2</sub> [M+Na]<sup>+</sup> 496.2247, found 496.2248.

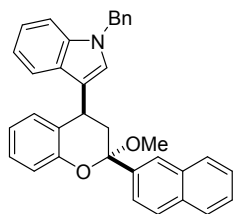

1-benzyl-3-(2-methoxy-2-(naphthalen-2-yl)chroman-4-yl)-1H-indole (**3aa**)

White solid; 94.0 mg, 95% yield; Reaction time = 12 h; mp 169.4-170.9 °C; <sup>1</sup>H NMR (400 MHz, CDCl<sub>3</sub>), δ 8.21 (s, 1H), 7.91-7.82 (m, 3H), 7.69 (d, *J* = 8.0 Hz, 1H), 7.51-7.46 (m, 2H), 7.38 (d, *J* = 8.0 Hz, 1H), 7.25-7.17 (m, 6H), 7.13-6.96 (m, 6H), 6.84 (t, *J* = 8.0 Hz, 1H), 5.23 (s, 2H), 4.88 (dd, *J*<sub>1</sub> = *J*<sub>2</sub> = 4.0 Hz, 1H), 3.21 (s, 3H), 2.63 (dd, *J*<sub>1</sub> = 8.0 Hz, *J*<sub>2</sub> = 4.0 Hz, 1H), 2.37 (t, *J* = 12.0 Hz, 1H); <sup>13</sup>C NMR (100 MHz, CDCl<sub>3</sub>) δ 152.1, 138.6, 137.6, 137.1, 133.2 (2C), 129.2, 128.8, 128.5, 128.3, 127.7, 127.6, 127.5, 126.8, 126.7, 126.6, 126.4, 126.3, 125.8, 124.0, 121.8, 121.4, 120.0, 119.1, 117.2, 117.0, 109.9, 100.8, one carbon missing in the aromatic region, 50.5, 50.0, 42.7, 30.2. IR (KBr) ν 3435, 3056, 3029, 2932, 2835, 1609, 1581, 1452, 1342, 1271, 1226, 1157, 1044, 907, 862, 823, 741, 699 cm<sup>-1</sup>. HRMS (ESI) calcd for C<sub>35</sub>H<sub>30</sub>NO<sub>2</sub> [M+H]<sup>+</sup> 496.2271, found 496.2281.

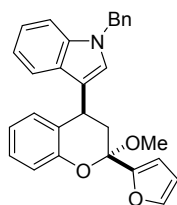

1-benzyl-3-(2-(furan-2-yl)-2-methoxychroman-4-yl)-1H-indole (**3ab**)

White solid; 86.4 mg, 99% yield; Reaction time = 12 h; mp 192.7-194.1 °C; <sup>1</sup>H NMR (400 MHz, CDCl<sub>3</sub>), δ 7.41 (s, 1H), 7.32-7.21 (m, 5H), 7.16-7.03 (m, 7H), 6.97 (t, *J* = 8.0 Hz, 1H), 6.81 (t, *J* = 8.0 Hz, 1H), 6.63 (d, *J* = 4.0 Hz, 1H), 6.39 (s, 1H), 5.27 (s, 2H), 4.76 (dd, *J*<sub>1</sub> = *J*<sub>2</sub> = 4.0 Hz, 1H), 3.23 (s, 3H), 2.73 (dd, *J*<sub>1</sub> = 8.0 Hz, *J*<sub>2</sub> = 4.0 Hz, 1H), 2.40 (t, *J* = 12.0 Hz, 1H); <sup>13</sup>C NMR (100 MHz, CDCl<sub>3</sub>) δ 152.7, 151.4, 142.5, 137.6, 137.1, 129.2, 128.8, 127.6 (2C), 127.3, 126.9, 126.8, 126.4, 121.8, 121.5, 120.1, 119.1, 117.1, 116.8, 110.2, 109.9, 108.5, 97.5, 50.8, 50.0, 39.5, 29.5. IR (KBr) ν 3434, 3038, 2940, 1609, 1584, 1456, 1343, 1265, 1233, 1157, 1039, 1007, 905, 815, 747, 698 cm<sup>-1</sup>. HRMS (ESI) calcd for C<sub>29</sub>H<sub>26</sub>NO<sub>3</sub> [M+H]<sup>+</sup> 436.1907, found 436.1901.

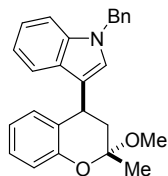

1-benzyl-3-(2-methoxy-2-methylchroman-4-yl)-1*H*-indole (**3ac**)

White solid; 68.3 mg, 89% yield; Reaction time = 36 h; mp 158.7-160.1 °C; <sup>1</sup>H NMR (400 MHz, CDCl<sub>3</sub>), δ 7.31-7.19 (m, 5H), 7.17-7.09 (m, 4H), 6.99 (q, *J* = 8.0 Hz, 3H), 6.91 (d, *J* = 8.0 Hz, 1H), 6.75 (t, *J* = 8.0 Hz, 1H), 5.26 (s, 2H), 4.63 (dd, *J*<sub>1</sub> = *J*<sub>2</sub> = 4.0 Hz, 1H), 3.34 (s, 3H), 2.32-2.23 (m, 2H), 1.57 (s, 3H); <sup>13</sup>C NMR (100 MHz, CDCl<sub>3</sub>) δ 152.2, 137.7, 137.2, 129.1, 128.8, 127.7, 127.4, 127.3, 126.9, 126.8, 126.3, 121.8, 120.9, 120.1, 119.1, 117.5, 116.8, 109.9, 98.7, 50.0, 49.2, 40.7, 29.6, 23.2. IR (KBr) ν 3433, 3055, 3032, 2985, 2935, 1609, 1582, 1480, 1456, 1345, 1225, 1191, 1065, 885, 806, 742 cm<sup>-1</sup>. HRMS (ESI) calcd for C<sub>26</sub>H<sub>26</sub>NO<sub>2</sub> [M+H]<sup>+</sup> 384.1958, found 384.1957.

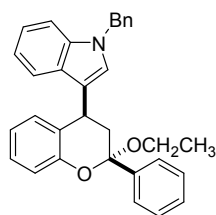

1-benzyl-3-(2-ethoxy-2-phenylchroman-4-yl)-1*H*-indole (**3ad**)

White solid; 89.1 mg, 97% yield; Reaction time = 12 h; mp 154.5-155.9 °C; <sup>1</sup>H NMR (400 MHz, CDCl<sub>3</sub>), δ 7.67 (t, *J* = 8.0 Hz, 2H), 7.41-6.98 (m, 16H), 6.82 (d, *J* = 8.0 Hz, 1H), 5.27 (s, 2H), 4.86 (s, 1H), 3.54 (d, *J* = 8.0 Hz, 1H), 3.39 (d, *J* = 8.0 Hz, 1H), 2.51-2.25 (m, 2H), 1.09 (t, *J* = 8.0 Hz, 3H); <sup>13</sup>C NMR (100 MHz, CDCl<sub>3</sub>) δ 152.3, 142.1, 137.6, 137.1, 129.0, 128.8, 128.4, 128.1, 127.6, 127.5, 127.4, 126.8, 126.7, 126.5, 126.2, 121.8, 121.1, 120.1, 119.0, 117.1, 117.0, 109.8, 100.6, 58.5, 50.0, 42.9, 30.2, 15.4. IR (KBr) ν 3428, 3062, 3031, 2975, 2929, 2886, 1611, 1581, 1487, 1456, 1337, 1264, 1233, 1161, 1058, 1018, 931, 896, 748, 702 cm<sup>-1</sup>. HRMS (ESI) calcd for C<sub>32</sub>H<sub>29</sub>NNaO<sub>2</sub> [M+Na]<sup>+</sup> 482.2089, found 482.2091.

### 3. Experimental data for bis-indole substituted chromans 4-7

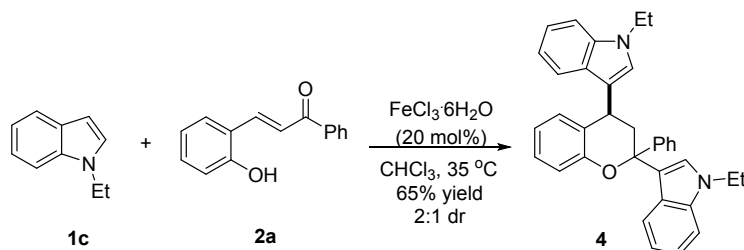



**General procedure for the synthesis of 4 bearing two same indole substituents:** To a 5.0 mL vial were successively added indole **1c** (0.44 mmol), *ortho*-hydroxychalcone **2a** (0.20 mmol), FeCl<sub>3</sub>·6H<sub>2</sub>O (10.8 mg, 0.04 mmol) and 1.0 mL CHCl<sub>3</sub>. The resulting mixture was stirred at 35 °C till almost full consumption of **2a** monitored by thin layer chromatography, and then the reaction mixture was directly subjected to flash column chromatography on silica gel (petroleum ether/ethyl acetate = 100:1 to 80:1) to afford the corresponding products **4** in 65% yield with 2:1 dr.

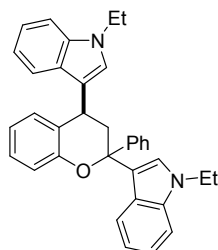

**3,3'-(2-phenylchromane-2,4-diyl)bis(1-ethyl-1H-indole) (**4**)**

White solid; 64.5 mg, 65% yield; Reaction time = 12 h; dr = 2:1; mp 87.8-88.9 °C; <sup>1</sup>H NMR (400 MHz, CDCl<sub>3</sub>) δ 7.75-7.61 (m, 1H), 7.50-7.45 (m, 2H), 7.25-6.81 (m, 14H), 6.73-6.60 (m, 2H), 4.32-3.90 (m, 5H), 3.24-3.09 (m, 1H), 2.93-2.77 (m, 1H), 1.33-1.24 (m, 6H); <sup>13</sup>C NMR (100 MHz, CDCl<sub>3</sub>) δ 153.2, 144.9, 135.7, 135.2, 128.1, 127.3, 126.9, 126.6, 126.3, 125.8, 125.2, 125.1, 124.9, 124.6, 124.2, 124.0, 120.5, 120.0, 119.5, 119.0, 118.8, 118.3, 117.7, 116.1, 115.9, 108.3, 79.5, 39.8, 39.7, 30.6, 29.7, 14.4, 14.3. IR (KBr) ν 3428, 3055, 2975, 2932, 2878, 1610, 1581, 1546, 1477, 1456, 1346, 1232, 906, 742, 706 cm<sup>-1</sup>. HRMS (ESI) calcd for C<sub>35</sub>H<sub>32</sub>N<sub>2</sub>NaO [M+Na]<sup>+</sup> 519.2407, found 519.2402.

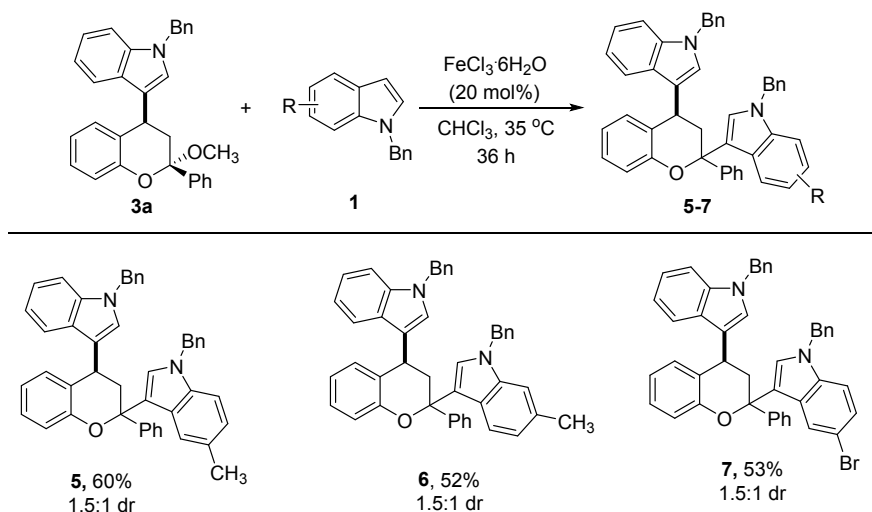

**General procedure for the synthesis of 5-7 bearing two different indole substituents:**

To a 5.0 mL vial were successively added mono-indole substituted chroman **3a** (0.10 mmol), substituted indole (0.11 mmol), FeCl<sub>3</sub>·6H<sub>2</sub>O (5.4 mg, 0.02 mmol) and 1.0 mL CHCl<sub>3</sub>. The resulting mixture was stirred at 35 °C for 36 h, and then the reaction mixture was directly subjected to flash column chromatography on silica gel (petroleum ether/ ethyl acetate = 100:1 to 80:1) to afford the corresponding products **5-7**. Among them, the two isomers of **7** could be separated by gel column chromatography, while for **5-6**, they could not be separated. The dr value was determined by <sup>1</sup>H NMR.

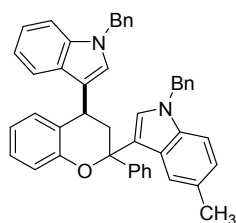

1-benzyl-3-(4-(1-benzyl-1*H*-indol-3-yl)-2-phenylchroman-2-yl)-5-methyl-1*H*-indole (**5**)

White solid; 38.3 mg, 60% yield; Reaction time = 36 h; dr = 1.5:1; mp 107.3-108.9 °C; <sup>1</sup>H NMR (400 MHz, CDCl<sub>3</sub>), δ 7.52 (d, *J* = 8.0 Hz, 2H), 7.24-6.80 (m, 25H), 6.63 (t, *J* = 8.0 Hz, 1H), 5.12 (dd, *J*<sub>1</sub> = 12.0 Hz, *J*<sub>2</sub> = 16.0 Hz, 4H), 4.34-3.98 (m, 1H), 3.28-3.07 (m, 1H), 2.94-2.74 (m, 1H), 2.28 (dd, *J*<sub>1</sub> = *J*<sub>2</sub> = 4.0 Hz, 3H); <sup>13</sup>C NMR (100 MHz, CDCl<sub>3</sub>) δ 153.4, 142.9, 136.9, 136.7, 136.6, 136.4, 128.3, 127.8, 127.7, 127.5, 127.2, 126.8, 126.6, 126.5, 126.3, 126.0, 125.8, 125.7, 125.6, 125.5, 125.4, 125.2, 124.8, 124.6, 122.7, 122.5, 120.3, 119.9, 116.2, 116.0, 108.9, 108.7, 119.3, 118.2, 80.2, 57.6, 49.1, 39.3, 30.8, 20.7. IR (KBr) ν 3432, 3058, 3030, 2923, 2860, 1610, 1582, 1485, 1451, 1302, 1234, 1176, 1102, 1030, 907, 799, 739, 701 cm<sup>-1</sup>. HRMS (ESI) calcd for C<sub>46</sub>H<sub>38</sub>N<sub>2</sub>NaO [M+Na]<sup>+</sup> 657.2876, found 657.2871.

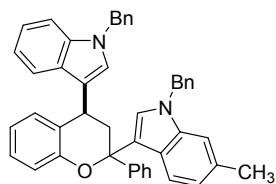

1-benzyl-3-(4-(1-benzyl-1*H*-indol-3-yl)-2-phenylchroman-2-yl)-6-methyl-1*H*-indole (**6**)

White solid; 32.9 mg, 52% yield; Reaction time = 36 h; dr = 1.5:1; mp 106.6-108.1 °C; <sup>1</sup>H NMR (400 MHz, CDCl<sub>3</sub>), δ 7.63-7.49 (m, 3H), 7.24-6.73 (m, 24H), 6.63 (dd, *J*<sub>1</sub> *J*<sub>2</sub> = 4.0 Hz, 1H), 5.17-5.07 (m, 4H), 4.34-3.94 (m, 1H), 3.22-3.03 (m, 1H), 2.92-2.74 (m, 1H), 2.30 (dd, *J*<sub>1</sub> = *J*<sub>2</sub> = 4.0 Hz, 3H); <sup>13</sup>C NMR (100 MHz, CDCl<sub>3</sub>) δ 154.3, 146.0, 143.9, 137.8, 137.7, 137.4, 136.9, 131.9, 131.7,

129.2, 128.8, 128.4, 128.1, 127.7, 127.6, 127.3, 127.1, 126.9, 126.8, 126.7, 126.6, 126.3, 126.1, 125.6, 123.9, 121.9, 121.8, 121.5, 120.9, 120.2, 119.8, 117.7, 117.0, 109.8, 80.6, 58.5, 49.8, 40.4, 30.8, 21.9. IR (KBr)  $\nu$  3433, 3059, 3030, 2923, 2861, 1612, 1583, 1478, 1454, 1300, 1235, 1174, 1106, 1029, 906, 802, 736, 702  $\text{cm}^{-1}$ . HRMS (ESI) calcd for  $\text{C}_{46}\text{H}_{38}\text{N}_2\text{NaO}$   $[\text{M}+\text{Na}]^+$  657.2876, found 657.2866.

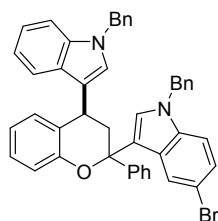

1-benzyl-3-(4-(1-benzyl-1*H*-indol-3-yl)-2-phenylchroman-2-yl)-5-bromo-1*H*-indole (**7**)

White solid; 37.5 mg, 53% yield; Reaction time = 36 h; dr = 1.5:1; mp 215.7-212.3 °C (major isomer), 219.8-221.1 °C (minor isomer);  $^1\text{H}$  NMR (400 MHz,  $\text{CDCl}_3$ ) for major isomer  $\delta$  7.88 (s, 1H), 7.49 (d,  $J = 8.0$  Hz, 2H), 7.28-7.01 (m, 17H), 6.92 (t,  $J = 8.0$  Hz, 5H), 6.84 (d,  $J = 8.0$  Hz, 1H), 6.73 (s, 1H), 6.65 (d,  $J = 4.0$  Hz, 1H), 5.17 (s, 2H), 5.06 (s, 2H), 4.01 (t,  $J = 4.0$  Hz, 1H), 3.13 (t,  $J = 12.0$  Hz, 1H), 2.92 (dd,  $J_1 = 4.0$  Hz,  $J_2 = 8.0$  Hz, 1H);  $^{13}\text{C}$  NMR (100 MHz,  $\text{CDCl}_3$ ) for major isomer  $\delta$  154.0, 143.4, 137.6, 137.0, 136.8, 136.0, 129.2, 128.9, 128.8, 128.6, 127.9, 127.8, 127.7, 127.6, 127.2, 127.1, 126.8, 126.7, 126.6, 126.5, 126.2, 125.4, 125.0, 124.1, 121.9, 121.1, 120.5, 119.9, 119.2, 117.4, 117.1, 113.2, 111.5, 109.9, 80.3, 58.6, 50.3, 40.4, 30.7.  $^1\text{H}$  NMR (400 MHz,  $\text{CDCl}_3$ ) for minor isomer  $\delta$  7.81 (s, 1H), 7.46 (d,  $J = 8.0$  Hz, 2H), 7.18-7.11 (m, 12 H), 7.08-6.98 (m, 6H), 6.96-6.92 (m, 2H), 6.89-6.86 (m, 3H), 6.81 (s, 1H), 6.63 (t,  $J = 8.0$  Hz, 1H), 5.15 (d,  $J = 4.0$  Hz, 4H), 4.35 (dd,  $J_1 = J_2 = 8.0$  Hz, 1H), 3.01 (dd,  $J_1 = 4.0$  Hz,  $J_2 = 8.0$  Hz, 1H), 2.73 (t,  $J = 12.0$  Hz, 1H);  $^{13}\text{C}$  NMR (100 MHz,  $\text{CDCl}_3$ ) for minor isomer  $\delta$  153.1, 144.5, 136.5, 135.8, 134.7, 128.1, 127.9, 127.8, 127.7, 127.5, 127.2, 126.9, 126.7, 126.6, 126.5, 126.3, 125.7, 125.5, 125.4, 125.3, 124.8, 124.2, 123.9, 122.6, 120.8, 119.4, 118.5, 118.2, 116.6, 116.4, 116.1, 112.2, 110.3, 108.8, 79.6, 57.4, 48.9, 41.0, 30.6. IR (KBr) for major isomer  $\nu$  3429, 3059, 3031, 2924, 2860, 1610, 1548, 1457, 1346, 1232, 1178, 1103, 1035, 906, 797, 735, 698  $\text{cm}^{-1}$ ; IR (KBr) for minor isomer  $\nu$  3434, 3060, 3031, 2958, 2926, 2861, 1723, 1608, 1582, 1546, 1456, 1389, 1340, 1298, 1260, 1234, 1179, 1075, 1025, 800, 736, 698  $\text{cm}^{-1}$ . HRMS (ESI) calcd for  $\text{C}_{45}\text{H}_{36}\text{BrN}_2\text{O}$   $[\text{M}+\text{H}]^+$  699.2006, found 699.1997.

**4. Experimental data for derivations of **3n** and **3v****

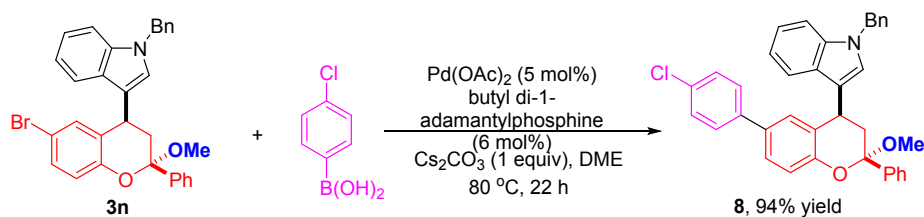

**General procedure for the synthesis of 8:** Under nitrogen atmosphere, compound **3n** (104.9 mg, 0.20 mmol), 4-chlorophenyl boronic acid (1.5 equiv),  $\text{Cs}_2\text{CO}_3$  (2.0 equiv),  $\text{Pd(OAc)}_2$  (0.05 equiv) and butyl di-1-adamantylphosphine (0.06 equiv) were successively added to a 15 mL dried tube, followed by adding 2.0 mL DME. The resulting mixture was stirred at 80 °C for 22 h till almost full consumption of **3n** monitored by thin layer chromatography, and then the reaction mixture was directly subjected to flash column chromatography on silica gel (petroleum ether/ethyl acetate) to afford the corresponding product **8**.

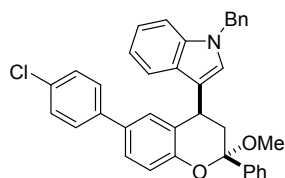

1-benzyl-3-(6-(4-chlorophenyl)-2-methoxy-2-phenylchroman-4-yl)-1*H*-indole (**8**)

White solid obtained by column chromatography (petroleum ether/ethyl acetate = 100:1); 104.7mg, 94% yield; Reaction time = 22 h; mp 194.8-196.1 °C;  $^1\text{H}$  NMR (400 MHz,  $\text{CDCl}_3$ ),  $\delta$  7.66 (d,  $J = 8.0$  Hz, 2H), 7.44-7.31 (m, 5H), 7.27-7.15 (m, 10H), 7.12 (t,  $J = 8.0$  Hz, 1H), 7.04-6.97 (m, 4H), 5.22 (s, 2H), 4.89 (dd,  $J_1 = J_2 = 8.0$  Hz, 1H), 3.19 (s, 3H), 2.57 (dd,  $J_1 = 4.0$  Hz,  $J_2 = 8.0$  Hz, 1H), 2.30 (t,  $J = 12.0$  Hz, 1H);  $^{13}\text{C}$  NMR (100 MHz,  $\text{CDCl}_3$ )  $\delta$  152.2, 140.9, 139.6, 137.7, 137.1, 133.0, 132.5, 128.8, 128.7, 128.5, 128.3, 128.0, 127.7, 127.4, 127.0, 126.8, 126.7, 126.3 (2C), 122.0, 119.8, 119.2, 117.8, 117.0, 109.9, 100.9, one carbon missing in the aromatic region, 50.5, 49.9, 43.1, 30.3. IR (KBr)  $\nu$  3432, 3031, 2961, 2931, 1610, 1476, 1337, 1251, 1209, 1156, 1042, 1015, 969, 909, 815, 735, 699  $\text{cm}^{-1}$ . HRMS (ESI) calcd for  $\text{C}_{37}\text{H}_{31}\text{ClNO}_2$   $[\text{M}+\text{H}]^+$  556.2038, found 556.2041.

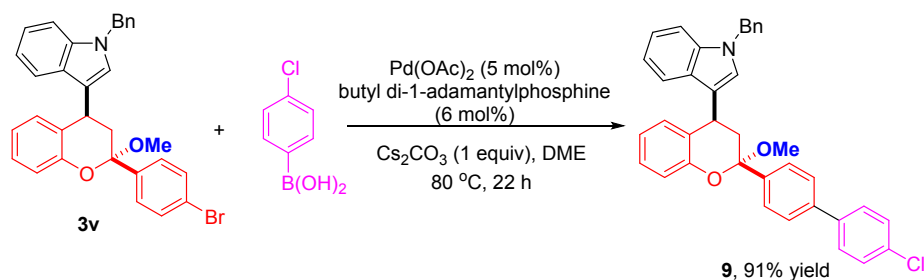

**General procedure for the synthesis of 9:** Under nitrogen atmosphere, compound **3v** (104.9 mg, 0.20 mmol), 4-chlorophenyl boronic acid (1.5 equiv), Cs<sub>2</sub>CO<sub>3</sub> (2.0 equiv), Pd(OAc)<sub>2</sub> (0.05 equiv) and butyl di-1-adamantylphosphine (0.06 equiv) were successively added to a 15 mL dried tube, followed by adding 2.0 mL DME. The resulting mixture was stirred at 80 °C for 22 h till almost full consumption of **3v** monitored by thin layer chromatography, and then the reaction mixture was directly subjected to flash column chromatography on silica gel (petroleum ether/ethyl acetate) to afford the corresponding product **9**.

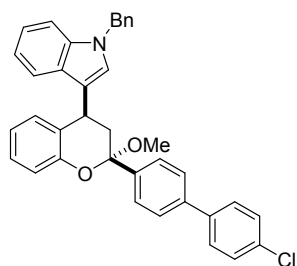

1-benzyl-3-(2-(4'-chloro-[1,1'-biphenyl]-4-yl)-2-methoxychroman-4-yl)-1H-indole (**9**)

White solid obtained by column chromatography (petroleum ether/ethyl acetate = 100:1); 100.8 mg, 91% yield; Reaction time = 22 h; mp 222.8-223.6 °C; <sup>1</sup>H NMR (400 MHz, CDCl<sub>3</sub>), δ 7.64 (d, *J* = 8.0 Hz, 2H), 7.50 (d, *J* = 8.0 Hz, 2H), 7.43 (d, *J* = 8.0 Hz, 2H), 7.30 (t, *J* = 8.0 Hz, 3H), 7.18-7.09 (m, 5H), 7.04-6.89 (m, 7H), 6.75 (t, *J* = 8.0 Hz, 1H), 5.17 (s, 2H), 4.76 (dd, *J*<sub>1</sub> = *J*<sub>2</sub> = 4.0 Hz, 1H), 3.13 (s, 3H), 2.46 (dd, *J*<sub>1</sub> = 8.0 Hz, *J*<sub>2</sub> = 4.0 Hz, 1H), 2.25 (t, *J* = 12.0 Hz, 1H); <sup>13</sup>C NMR (100 MHz, CDCl<sub>3</sub>) δ 152.0, 140.6, 139.8, 139.2, 137.6, 137.1, 133.6, 129.1, 129.0, 128.8, 128.4, 127.6 (2C), 127.4, 127.0, 126.9, 126.8, 126.7, 126.5, 121.8, 121.3, 120.0, 119.1, 117.1, 117.0, 109.9, 100.6, 50.4, 50.0, 42.8, 30.2. IR (KBr) ν 3434, 3032, 2962, 2931, 1610, 1581, 1480, 1457, 1388, 1345, 1297, 1263, 1225, 1154, 1100, 1040, 1017, 967, 906, 852, 816 cm<sup>-1</sup>. HRMS (ESI) calcd for C<sub>37</sub>H<sub>31</sub>ClNO<sub>2</sub> [M+H]<sup>+</sup> 556.2038, found 556.2042.

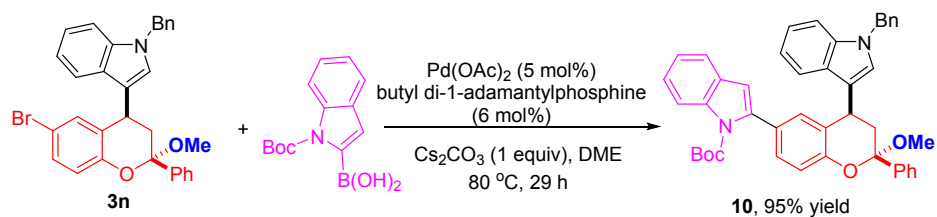

**General procedure for the synthesis of 10:** Under nitrogen atmosphere, compound **3n** (104.9 mg, 0.20 mmol), 2-indolyl boronic acid (1.7 equiv), Cs<sub>2</sub>CO<sub>3</sub> (2.0 equiv), Pd(OAc)<sub>2</sub> (0.05 equiv) and butyl di-1-adamantylphosphine (0.06 equiv) were successively added to a 15 mL dried tube, followed by adding 2.0 mL DME. The resulting mixture was stirred at 80 °C for 29 h till almost full consumption of **3n** monitored by thin layer chromatography, and then the reaction mixture was directly subjected to flash column chromatography on silica gel (petroleum ether/ethyl acetate) to afford the corresponding product **10**.

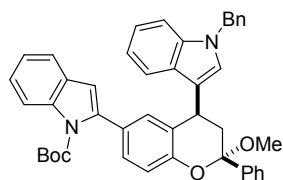

*tert*-butyl 2-(4-(1-benzyl-1*H*-indol-3-yl)-2-methoxy-2-phenylchroman-6-yl)-1*H*-indole-1-carboxylate (**10**)

White solid obtained by column chromatography (petroleum ether/ethyl acetate = 100:1 to 80:1); 124.9 mg, 95% yield; Reaction time = 29 h; mp 205.4-206.9 °C; <sup>1</sup>H NMR (400 MHz, CDCl<sub>3</sub>), δ 8.14 (d, *J* = 8.0 Hz, 1H), 7.67 (d, *J* = 8.0 Hz, 2H), 7.45-7.33 (m, 5H), 7.27-7.14 (m, 7H), 7.11-7.04 (m, 5H), 7.01 (s, 1H), 6.96 (t, *J* = 8.0 Hz, 1H), 6.32 (s, 1H), 5.23 (s, 2H), 4.84 (dd, *J*<sub>1</sub> = *J*<sub>2</sub> = 4.0 Hz, 1H), 3.17 (s, 3H), 2.55 (dd, *J*<sub>1</sub> = 8.0 Hz, *J*<sub>2</sub> = 4.0 Hz, 1H), 2.36 (t, *J* = 12.0 Hz, 1H), 1.32 (s, 9H); <sup>13</sup>C NMR (100 MHz, CDCl<sub>3</sub>) δ 151.9, 150.3, 140.9, 140.7, 137.5, 137.3, 137.2, 129.4, 129.2, 128.8, 128.4, 128.3, 128.2, 127.9, 127.6, 127.2, 126.8, 126.7, 126.3, 126.0, 124.0, 122.8, 121.9, 120.2, 119.8, 119.1, 116.7, 116.6, 115.2, 109.9, 109.3, 100.9, 83.1, 50.3, 49.9, 42.9, 30.4, 27.7. IR (KBr) ν 3425, 3058, 2974, 2933, 1726, 1610, 1486, 1455, 1365, 1330, 1257, 1217, 1161, 1126, 1042, 1022, 907, 813, 739, 703 cm<sup>-1</sup>. HRMS (ESI) calcd for C<sub>44</sub>H<sub>41</sub>N<sub>2</sub>O<sub>4</sub> [M+H]<sup>+</sup> 661.3061, found 661.3060.

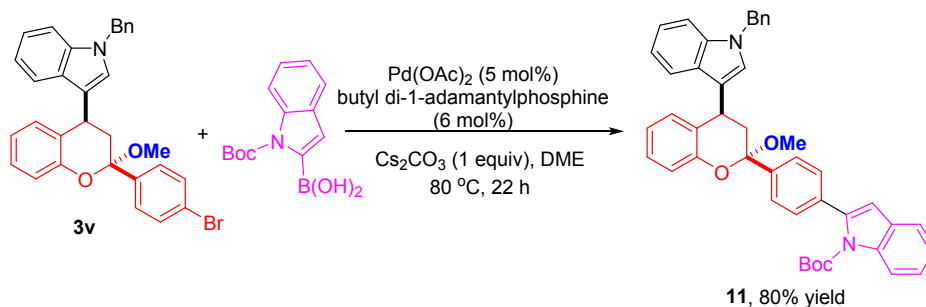

**General procedure for the synthesis of 11:** Under nitrogen atmosphere, compound **3v** (104.9 mg, 0.20 mmol), 2-indolyl boronic acid (1.8 equiv), Cs<sub>2</sub>CO<sub>3</sub> (2.0 equiv), Pd(OAc)<sub>2</sub> (0.05 equiv) and butyl di-1-adamantylphosphine (0.06 equiv) were successively added to a 15 mL dried tube, followed by adding 2.0 mL DME. The resulting mixture was stirred at 80 °C for 22 h till almost full consumption of **3v** monitored by thin layer chromatography, and then the reaction mixture was directly subjected to flash column chromatography on silica gel (petroleum ether/ethyl acetate) to afford the corresponding product **11**.

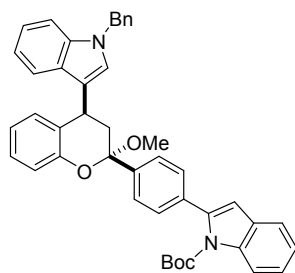

*tert*-butyl 2-(4-(1-benzyl-1*H*-indol-3-yl)-2-methoxychroman-2-yl)phenyl)-1*H*-indole-1-carboxylate (**11**)

White solid obtained by column chromatography (petroleum ether/ethyl acetate = 100:1 to 80:1); 105.8 mg, 80% yield; Reaction time = 22 h; mp 229.8-230.9 °C; <sup>1</sup>H NMR (400 MHz, CDCl<sub>3</sub>) δ 8.23 (d, *J* = 8.0 Hz, 1H), 7.69 (d, *J* = 8.0 Hz, 2H), 7.54 (d, *J* = 8.0 Hz, 1H), 7.47 (d, *J* = 8.0 Hz, 2H), 7.38 (d, *J* = 8.0 Hz, 1H), 7.35-6.98 (m, 14H), 6.83 (t, *J* = 8.0 Hz, 1H), 6.56 (s, 1H), 5.26 (s, 2H), 4.85 (dd, *J*<sub>1</sub> = *J*<sub>2</sub> = 4.0 Hz, 1H), 3.22 (s, 3H), 2.55 (dd, *J*<sub>1</sub> = 4.0 Hz, *J*<sub>2</sub> = 8.0 Hz, 1H), 2.32 (t, *J* = 12.0 Hz, 1H), 1.28 (s, 9H); <sup>13</sup>C NMR (100 MHz, CDCl<sub>3</sub>) δ 152.0, 150.2, 140.6, 140.1, 137.6 (2C), 137.1, 134.9, 129.3, 129.1, 128.8, 127.7, 127.6, 127.5, 126.9, 126.7, 126.6, 125.8, 124.5, 123.0, 121.9, 121.3, 120.5, 120.0, 119.1, 117.1, 117.0, 115.3, 110.3, 109.9, 100.6, one carbon missing in the aromatic region, 83.5, 50.4, 50.0, 42.8, 30.2, 27.7. IR (KBr) ν 3427, 3071, 3033, 2979, 2935, 1721, 1583, 1456, 1363, 1330, 1264, 1227, 1161, 1037, 967, 905, 849, 816, 745 cm<sup>-1</sup>. HRMS (ESI) calcd for C<sub>44</sub>H<sub>41</sub>N<sub>2</sub>O<sub>4</sub> [M+H]<sup>+</sup> 661.3061, found 661.3074.

## 5. Crystal data for 3o

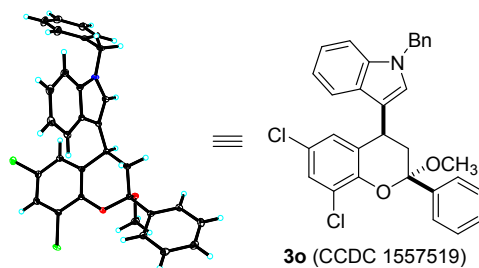

Displacement ellipsoids are drawn at the 30% probability level.

**Table S1.** Crystal data and structure refinement for **3o**.

|                                   |                                                                 |                    |
|-----------------------------------|-----------------------------------------------------------------|--------------------|
| Identification code               | <b>3o</b>                                                       |                    |
| Empirical formula                 | C <sub>31</sub> H <sub>25</sub> Cl <sub>2</sub> NO <sub>2</sub> |                    |
| Formula weight                    | 514.42                                                          |                    |
| Temperature                       | 100(2) K                                                        |                    |
| Wavelength                        | 0.71073 Å                                                       |                    |
| Crystal system                    | Triclinic                                                       |                    |
| Space group                       | P-1                                                             |                    |
| Unit cell dimensions              | a = 9.3851(6) Å                                                 | α = 95.0880(10)°.  |
|                                   | b = 11.5543(8) Å                                                | β = 91.1550(10)°.  |
|                                   | c = 12.0921(8) Å                                                | γ = 104.0260(10)°. |
| Volume                            | 1265.96(15) Å <sup>3</sup>                                      |                    |
| Z                                 | 2                                                               |                    |
| Density (calculated)              | 1.350 Mg/m <sup>3</sup>                                         |                    |
| Absorption coefficient            | 0.286 mm <sup>-1</sup>                                          |                    |
| F(000)                            | 536                                                             |                    |
| Crystal size                      | 0.280 x 0.240 x 0.210 mm <sup>3</sup>                           |                    |
| Theta range for data collection   | 1.692 to 31.044°.                                               |                    |
| Index ranges                      | -13 ≤ h ≤ 13, -15 ≤ k ≤ 16, -16 ≤ l ≤ 16                        |                    |
| Reflections collected             | 19072                                                           |                    |
| Independent reflections           | 7379 [R(int) = 0.0291]                                          |                    |
| Completeness to theta = 25.242°   | 99.6 %                                                          |                    |
| Absorption correction             | Semi-empirical from equivalents                                 |                    |
| Refinement method                 | Full-matrix least-squares on F <sup>2</sup>                     |                    |
| Data / restraints / parameters    | 7379 / 0 / 326                                                  |                    |
| Goodness-of-fit on F <sup>2</sup> | 1.034                                                           |                    |
| Final R indices [I > 2σ(I)]       | R1 = 0.0375, wR2 = 0.0992                                       |                    |
| R indices (all data)              | R1 = 0.0513, wR2 = 0.1070                                       |                    |
| Extinction coefficient            | n/a                                                             |                    |



Largest diff. peak and hole 0.384 and -0.258 e.Å<sup>-3</sup>

## 6. $^1\text{H}$ NMR and $^{13}\text{C}$ NMR spectra

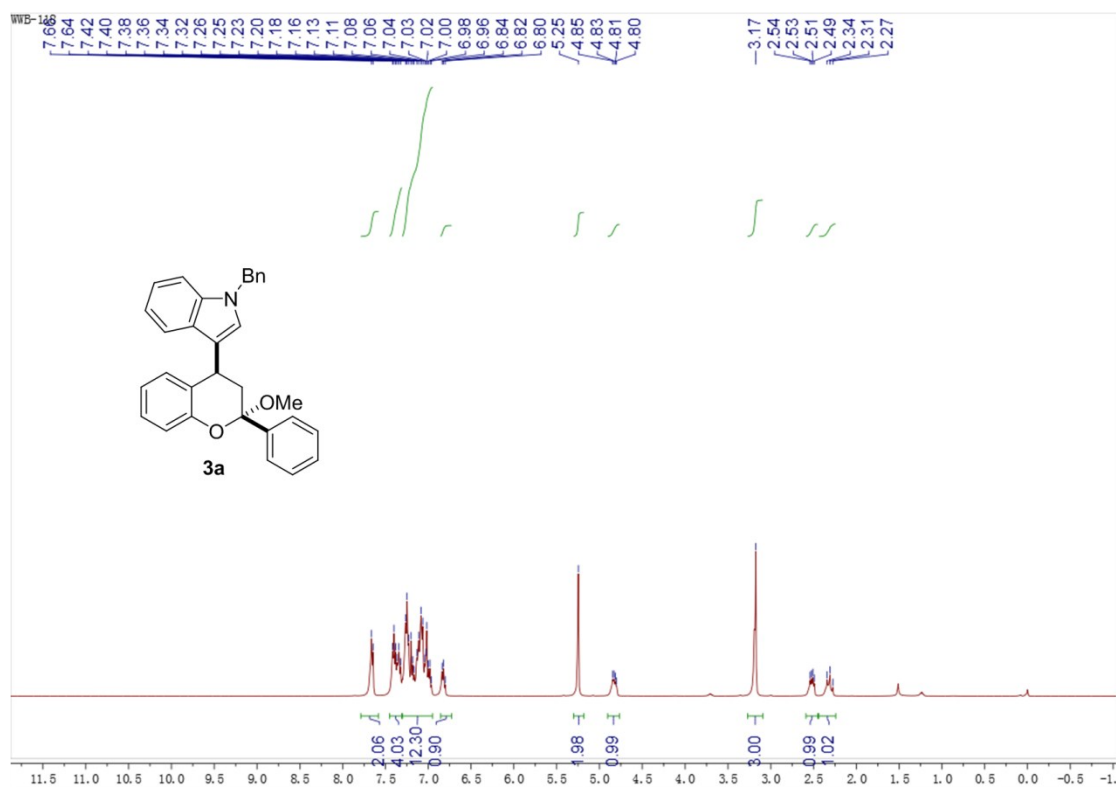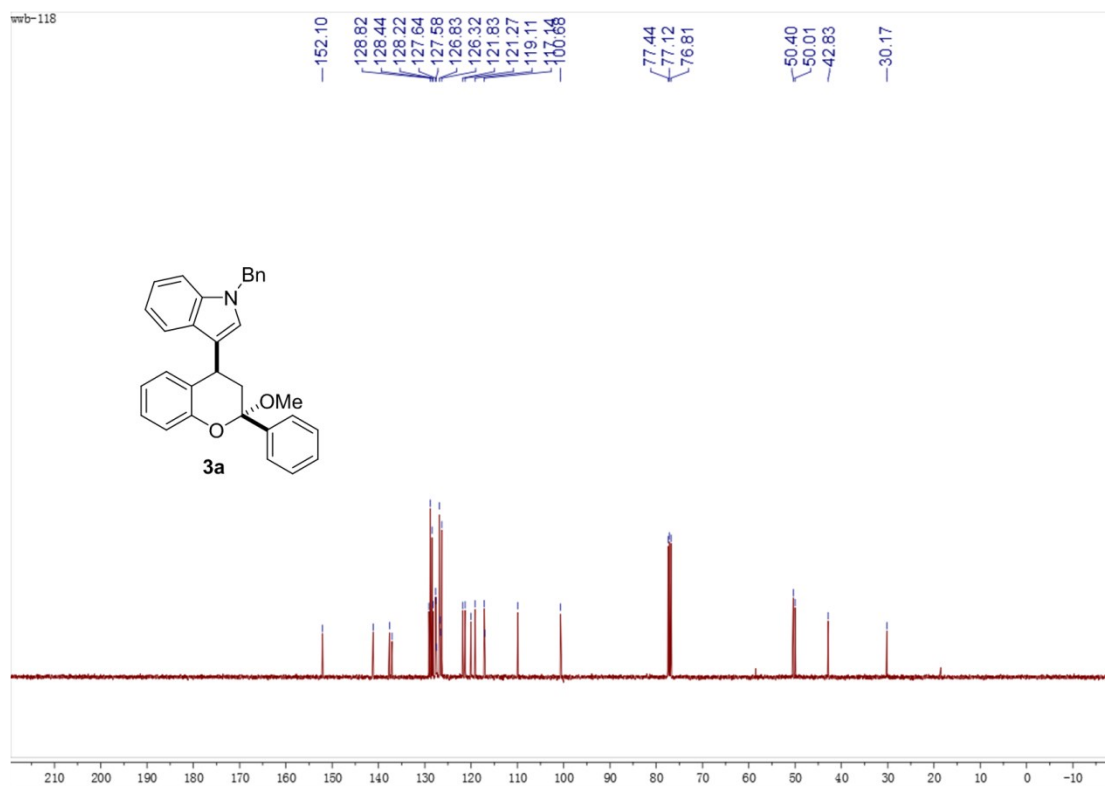

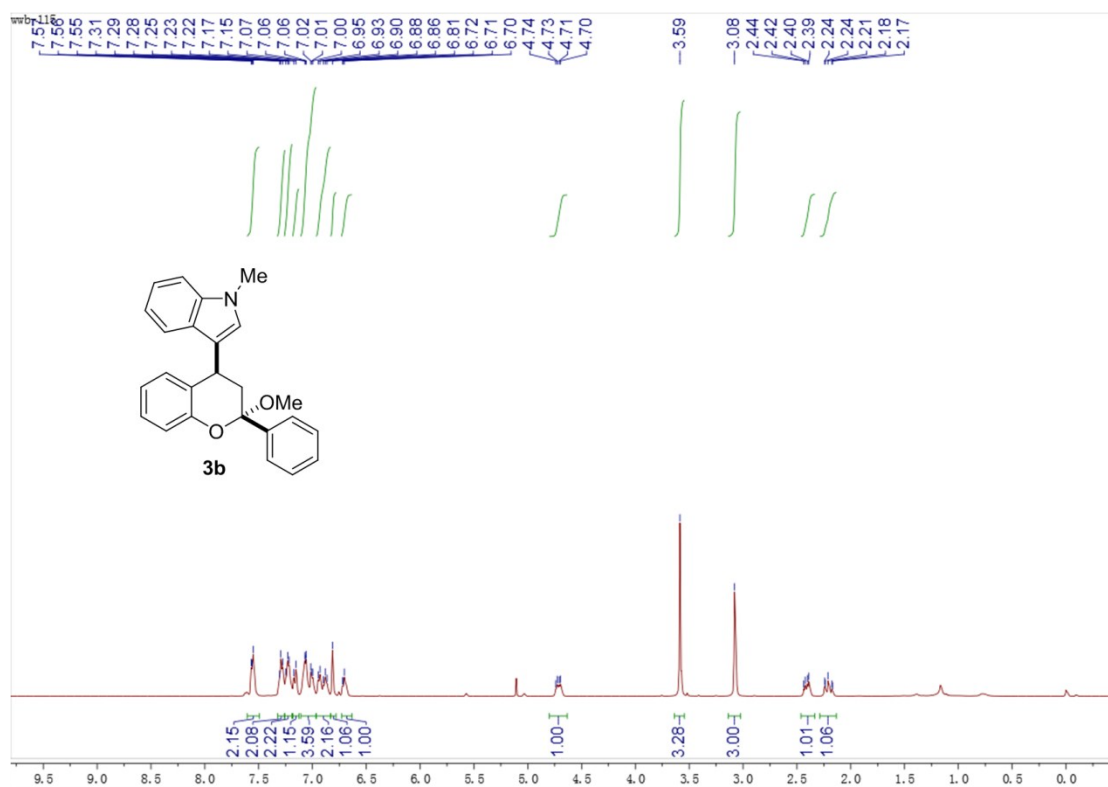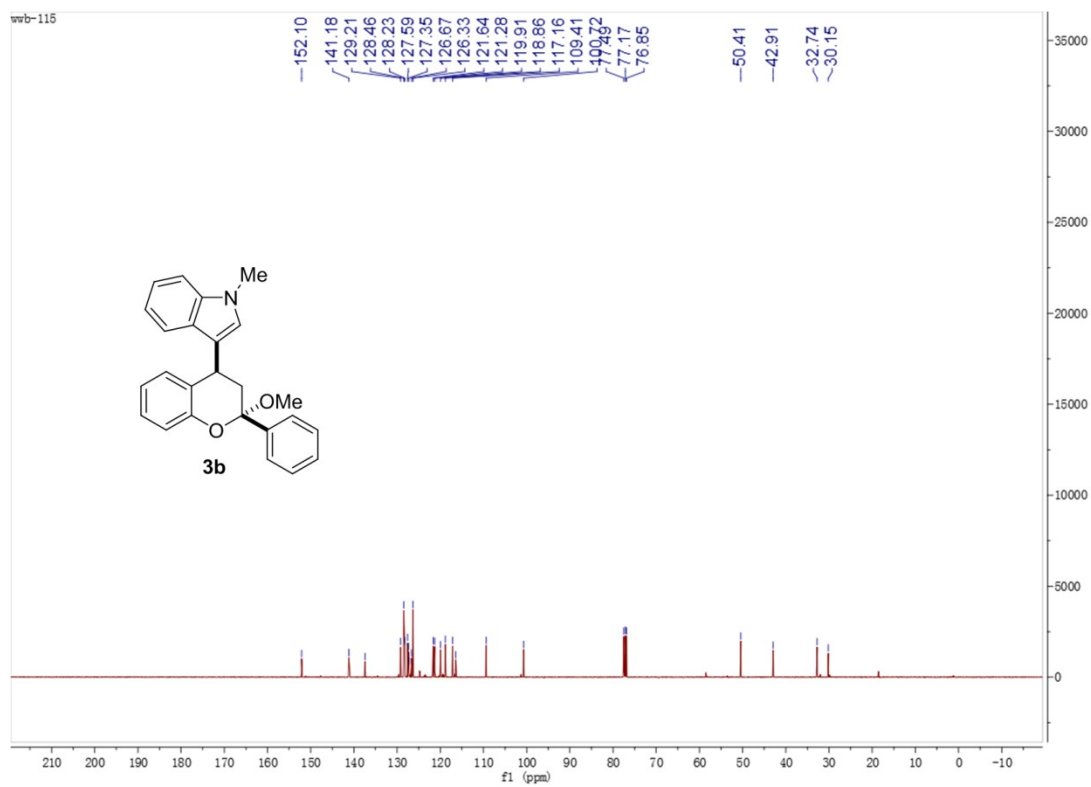

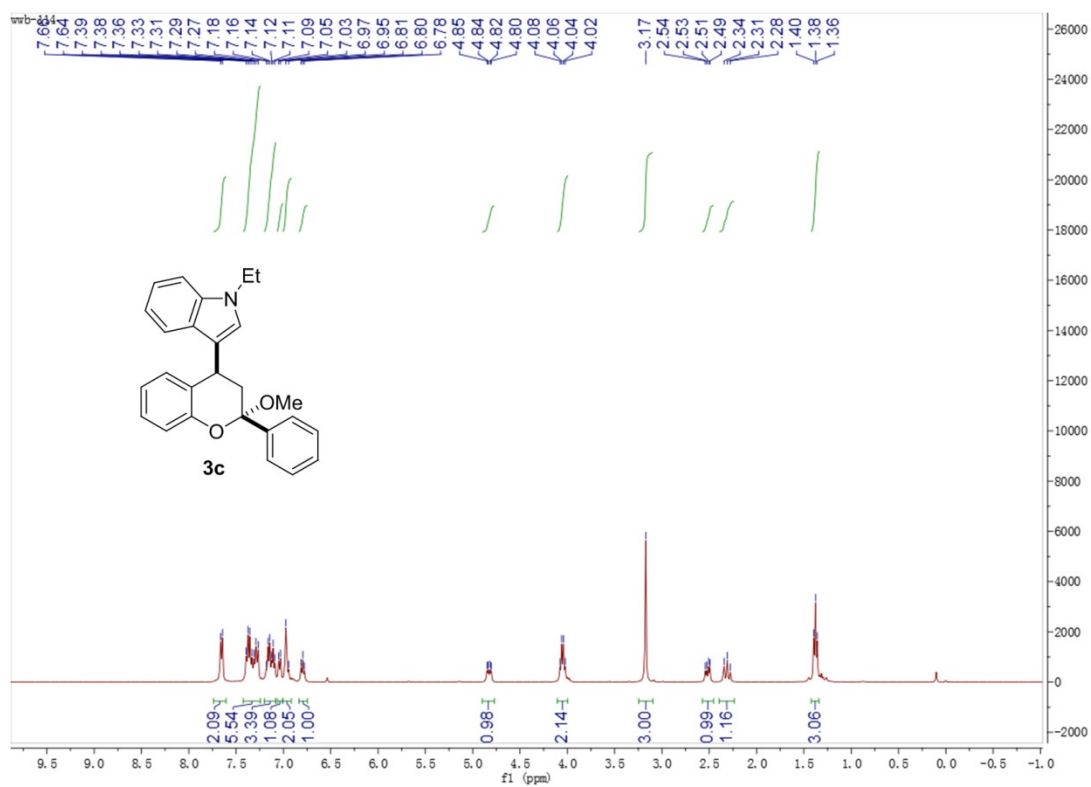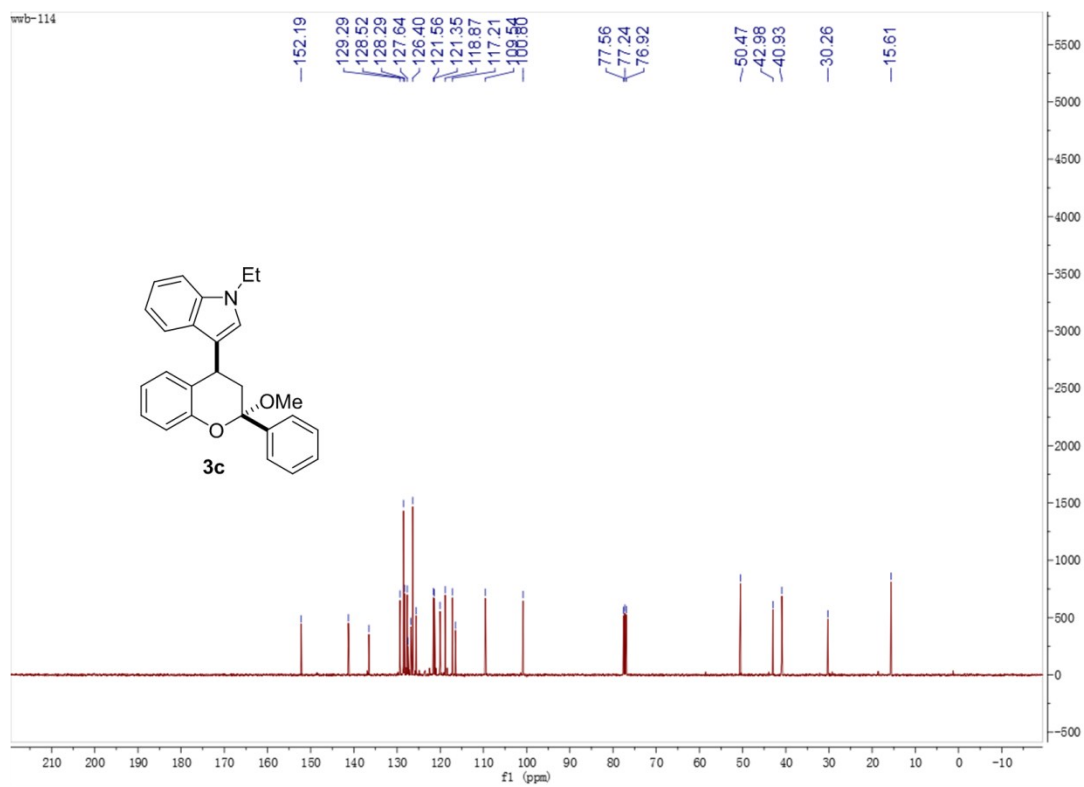

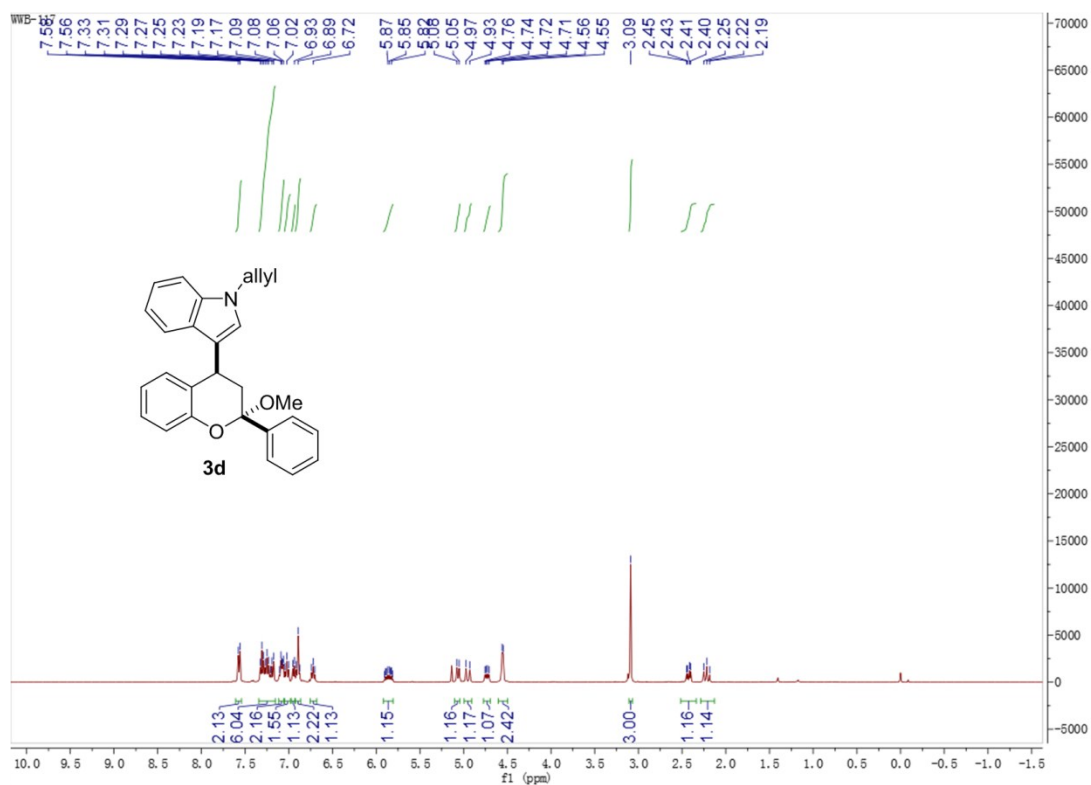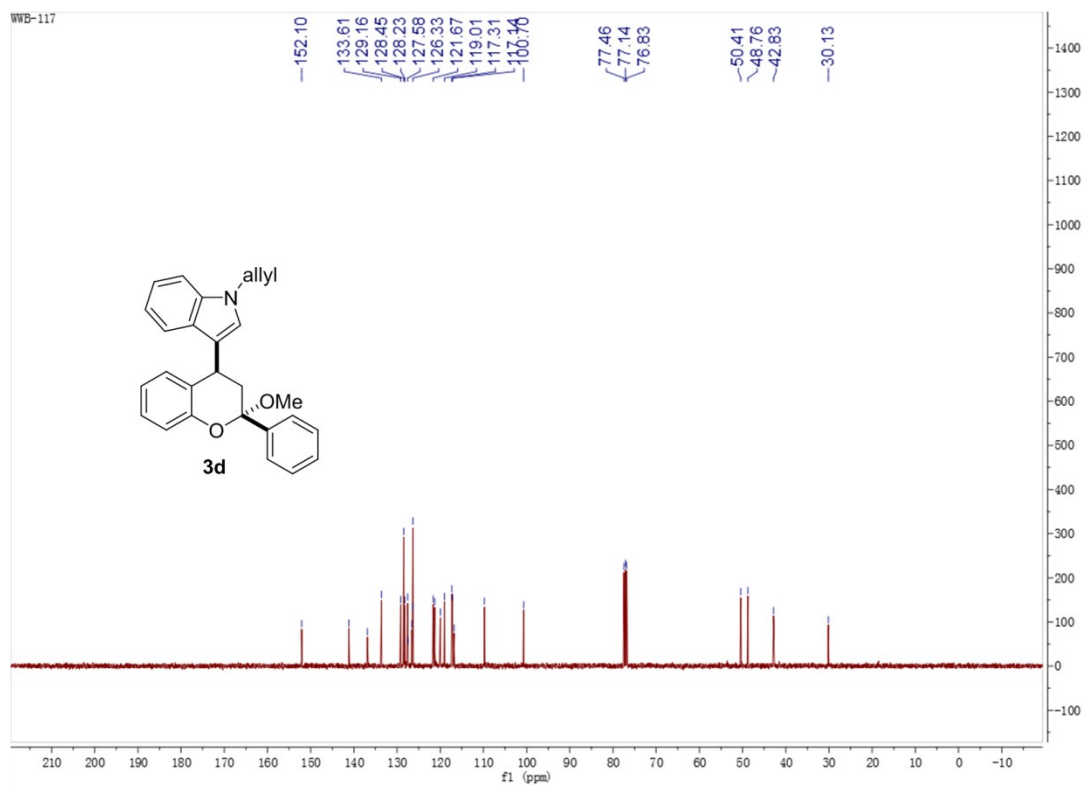

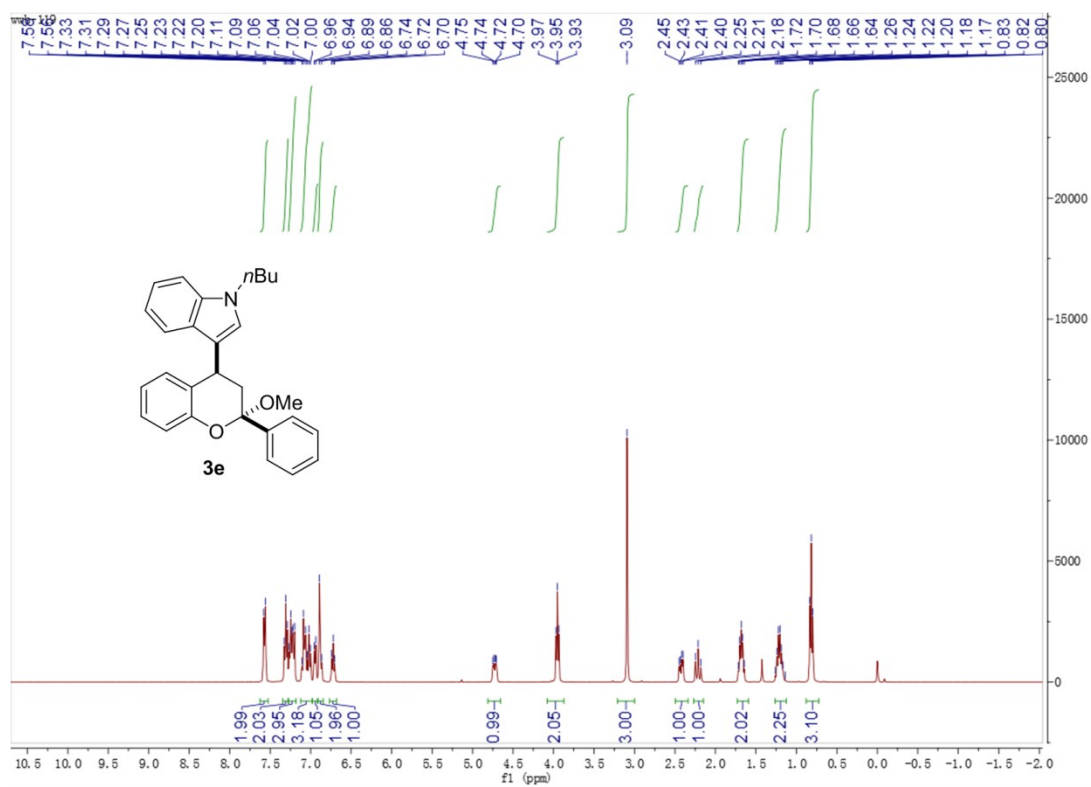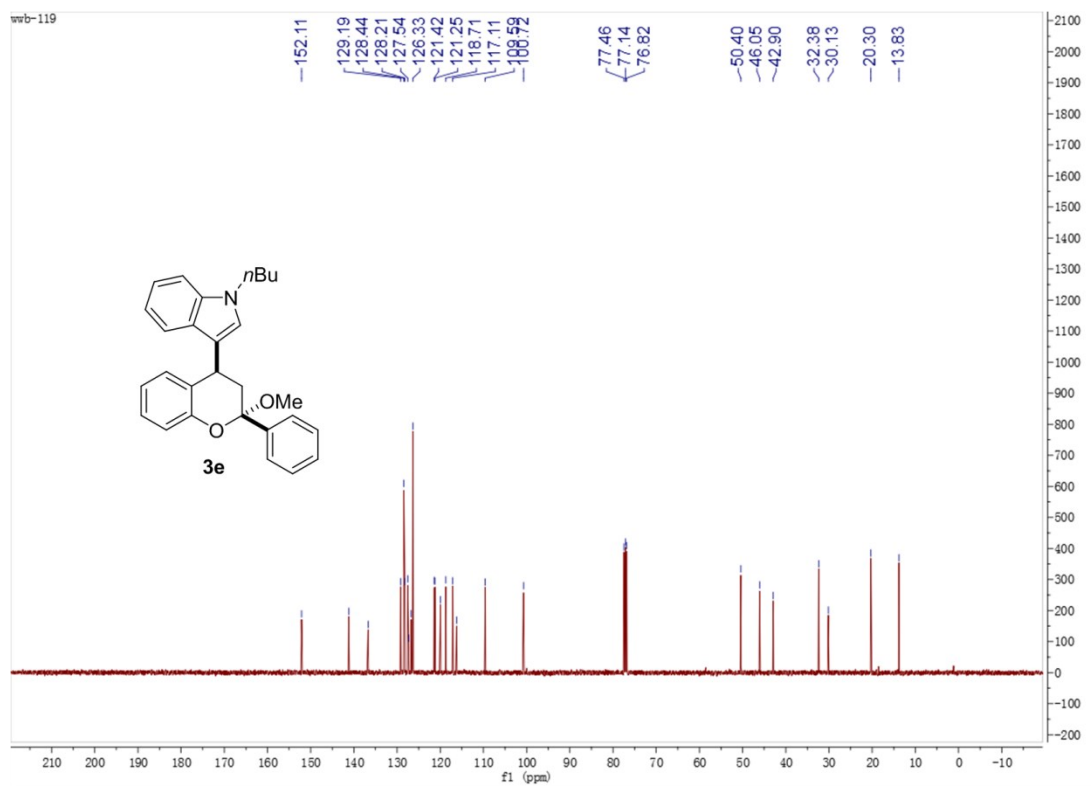

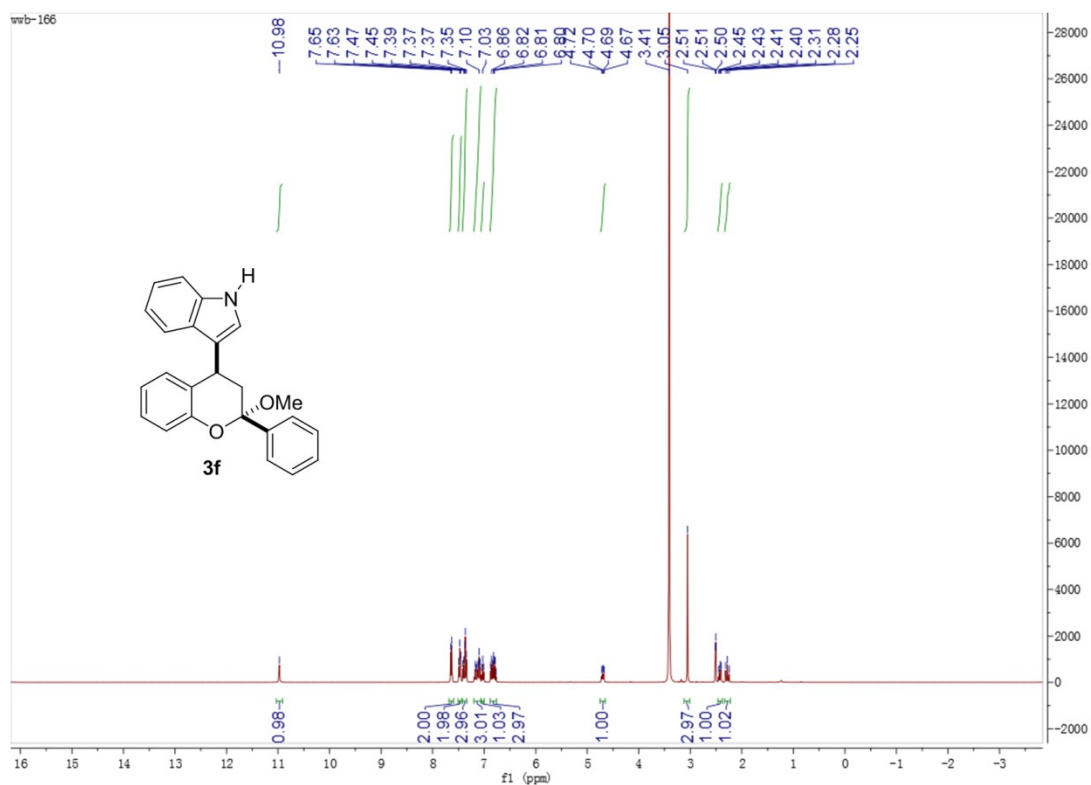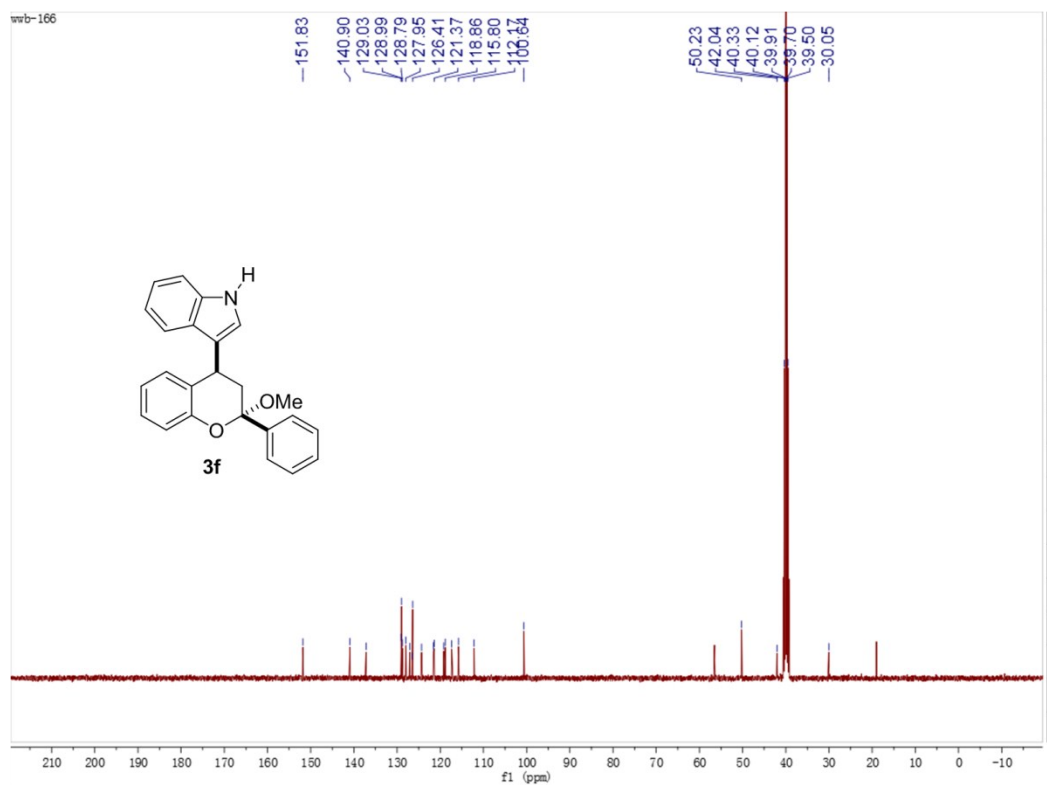

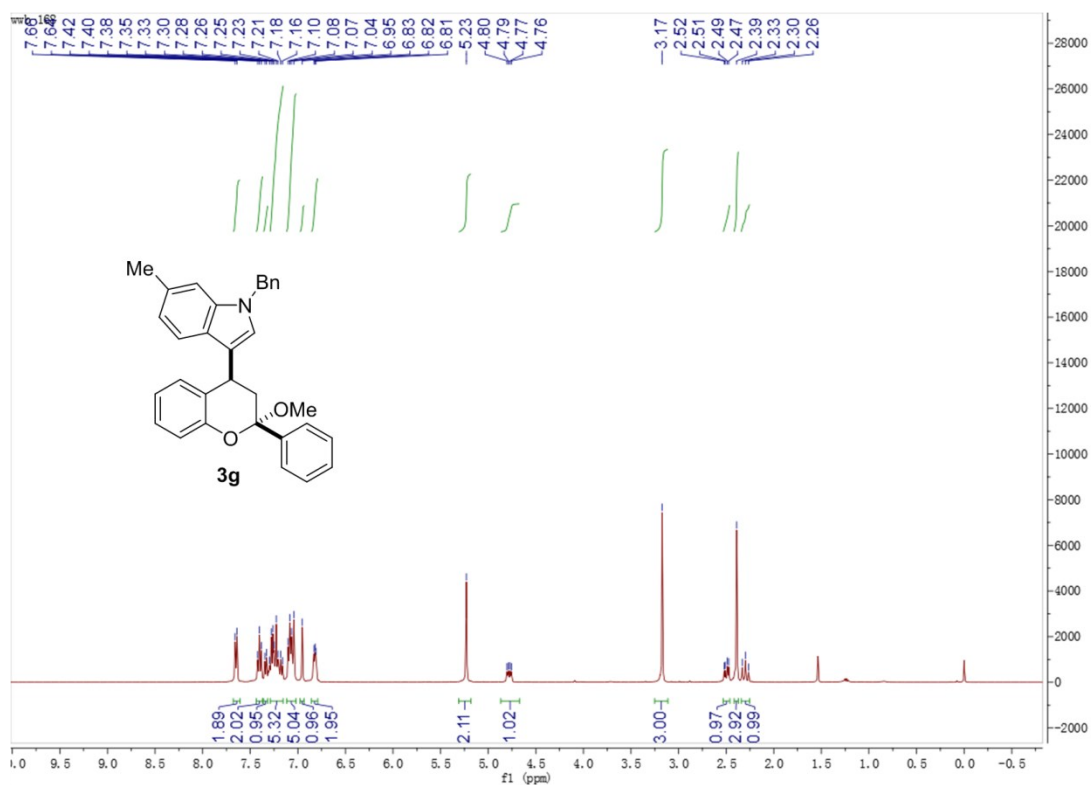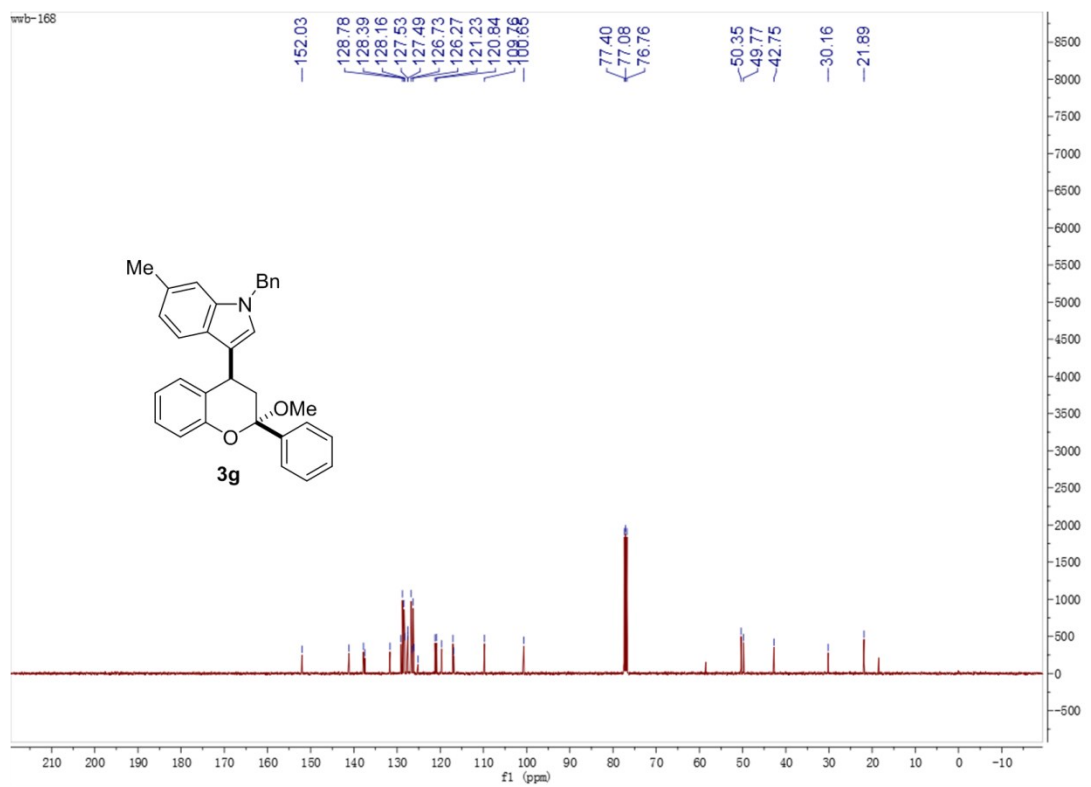



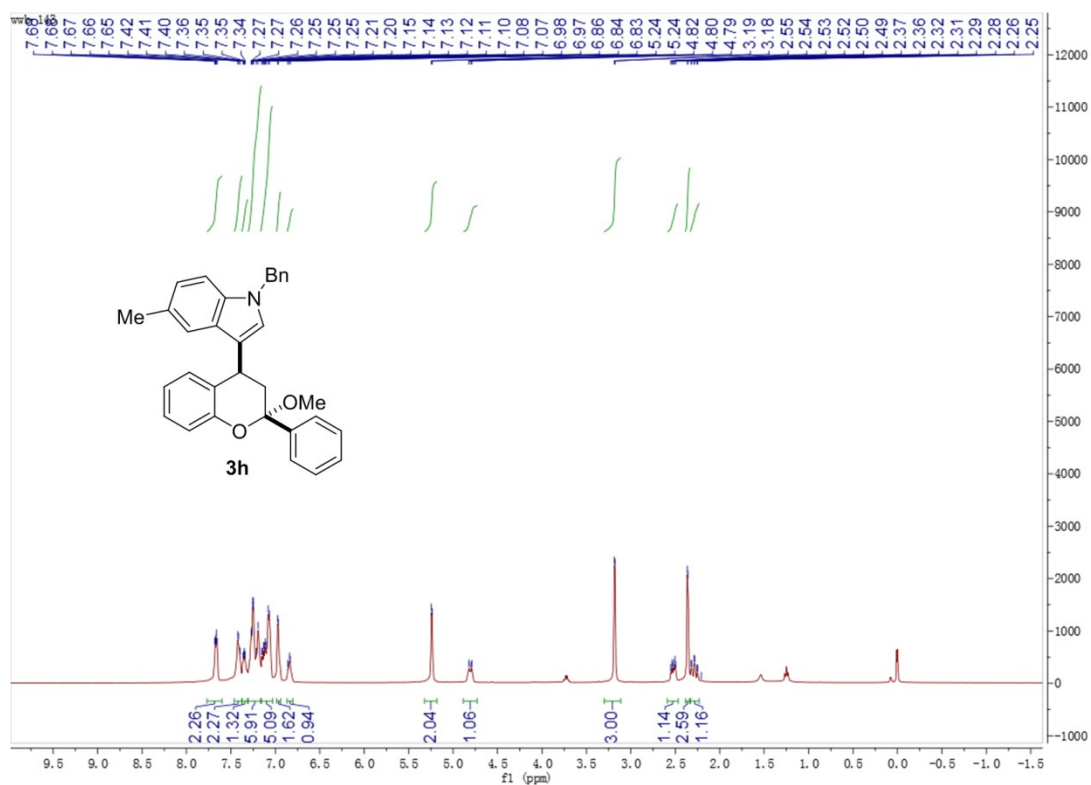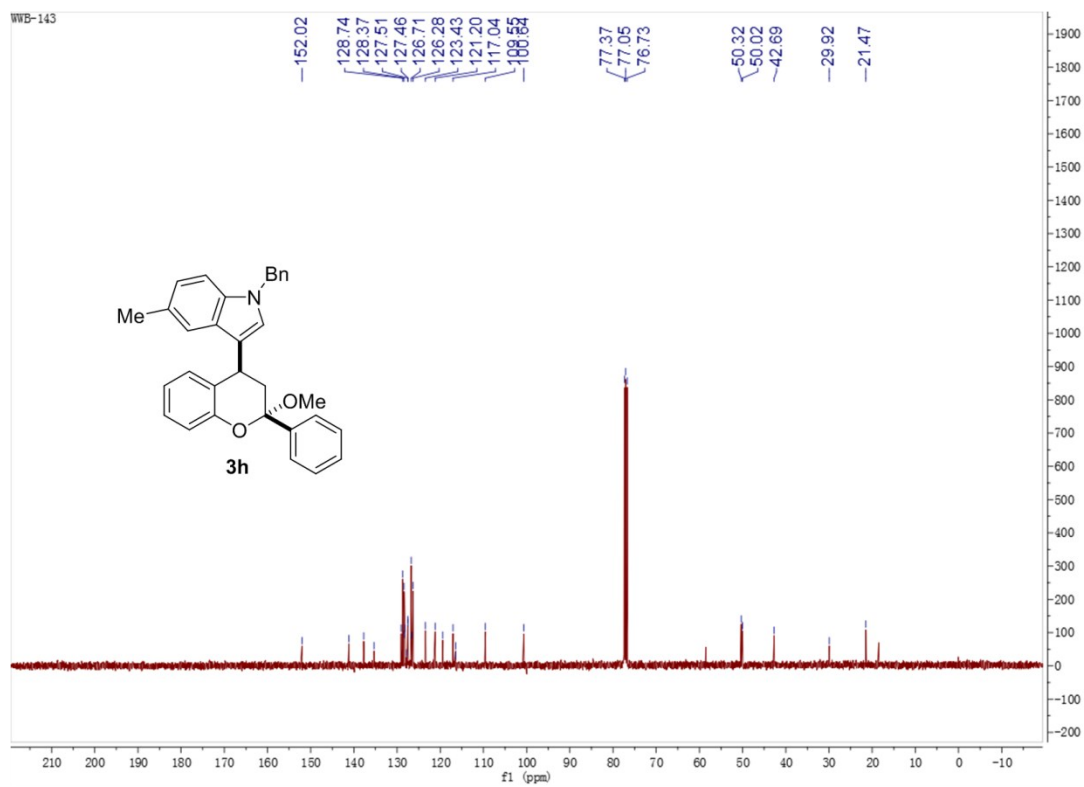

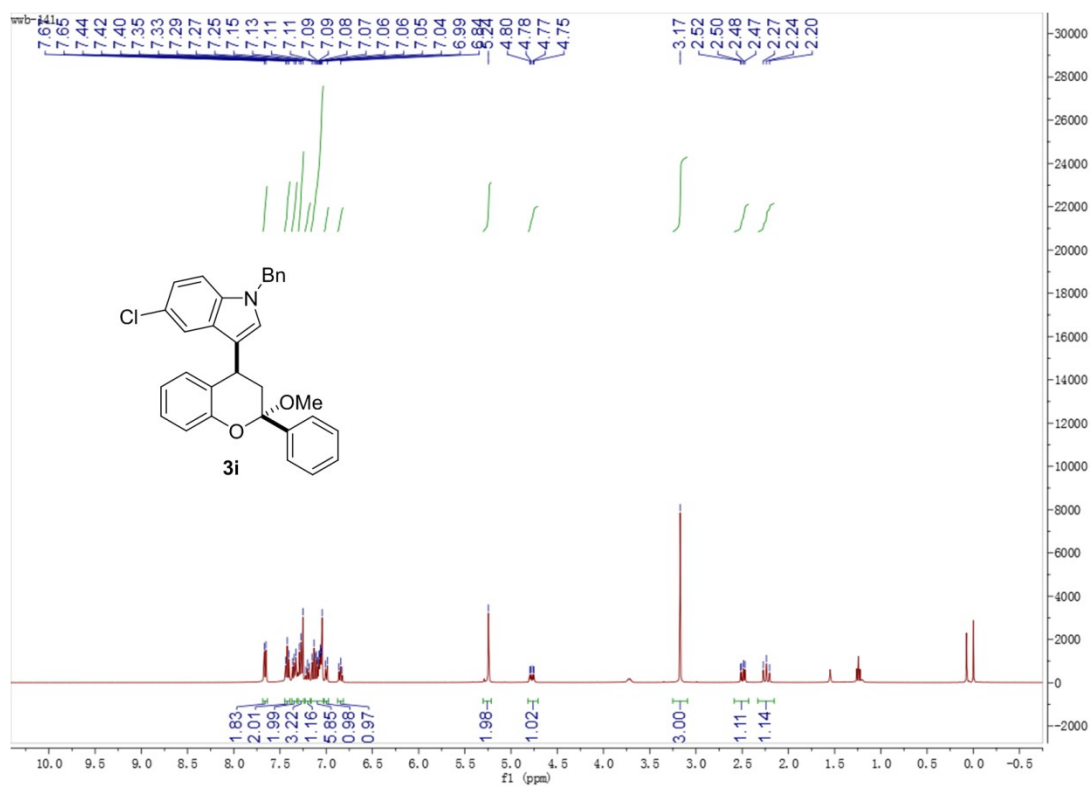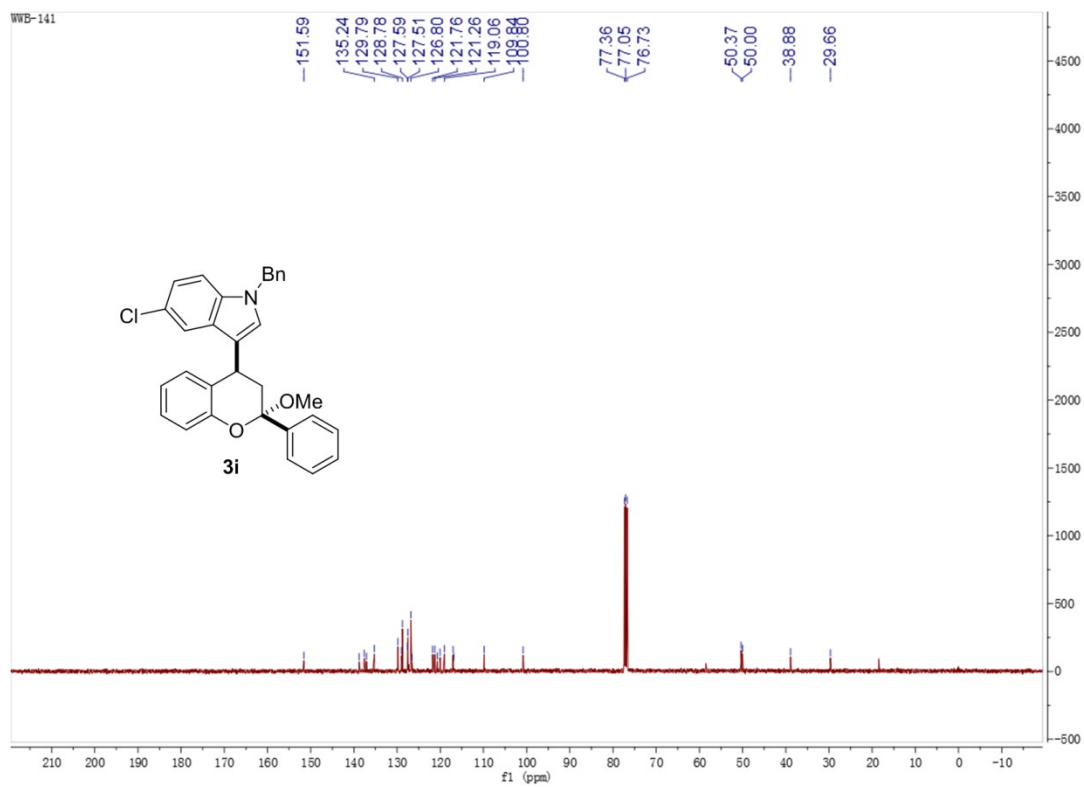

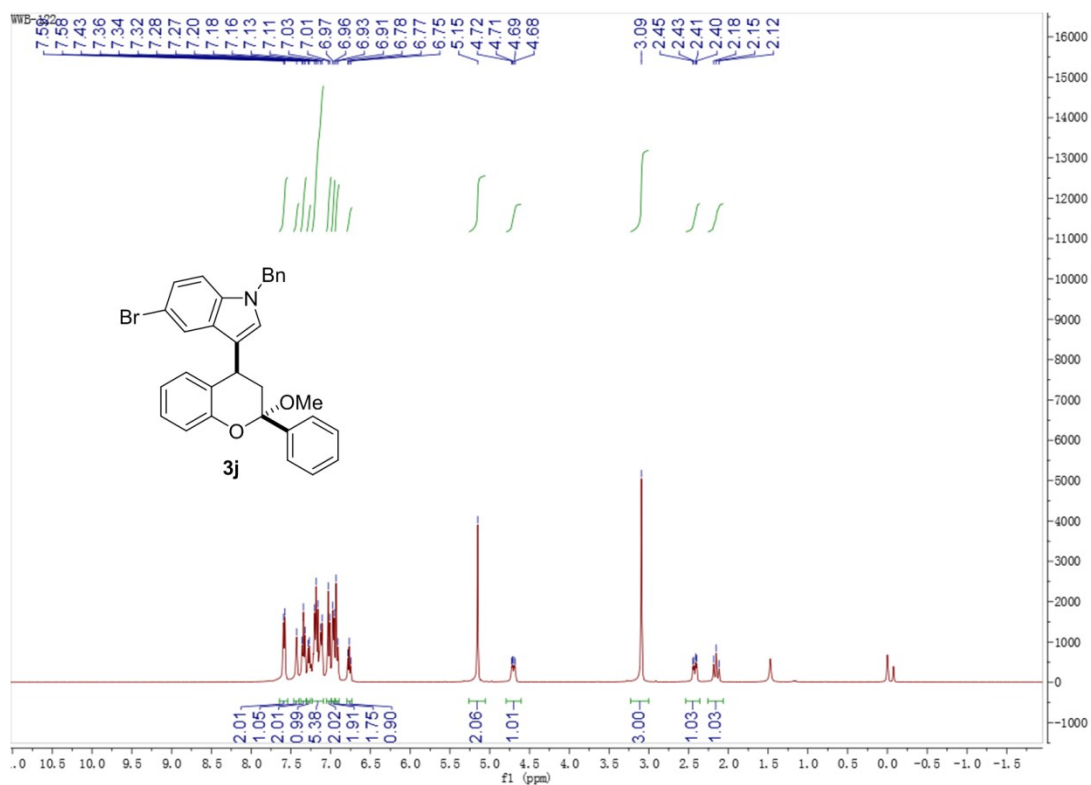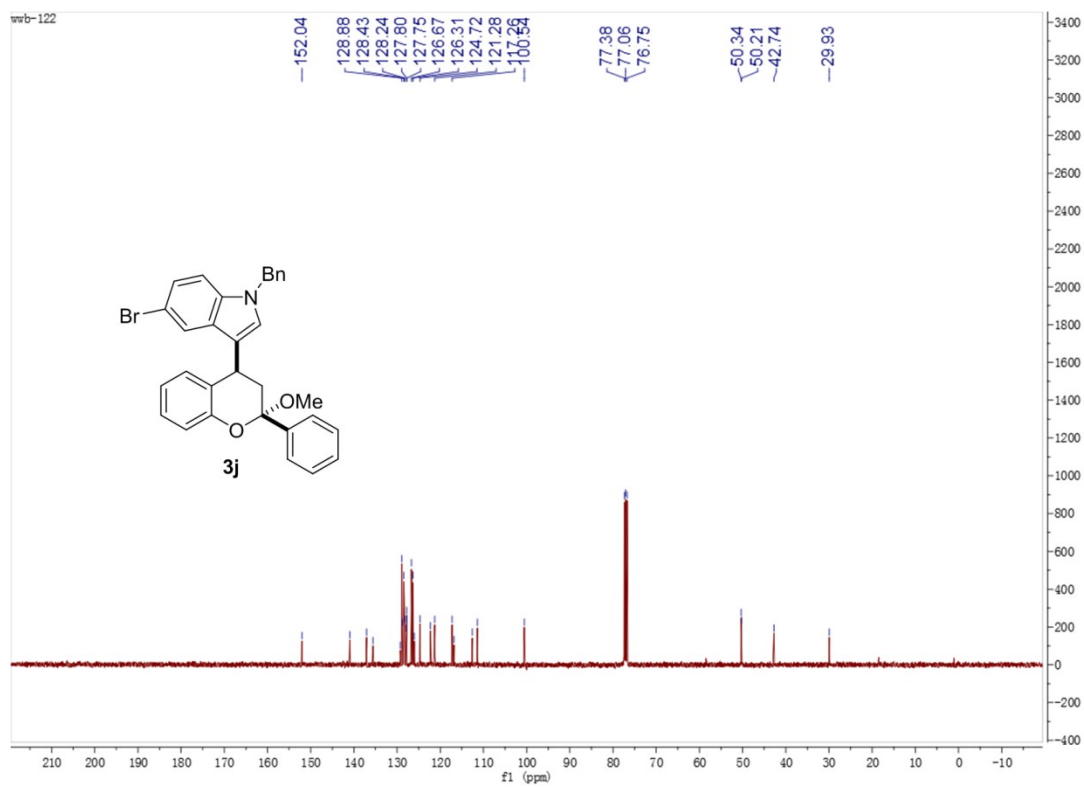

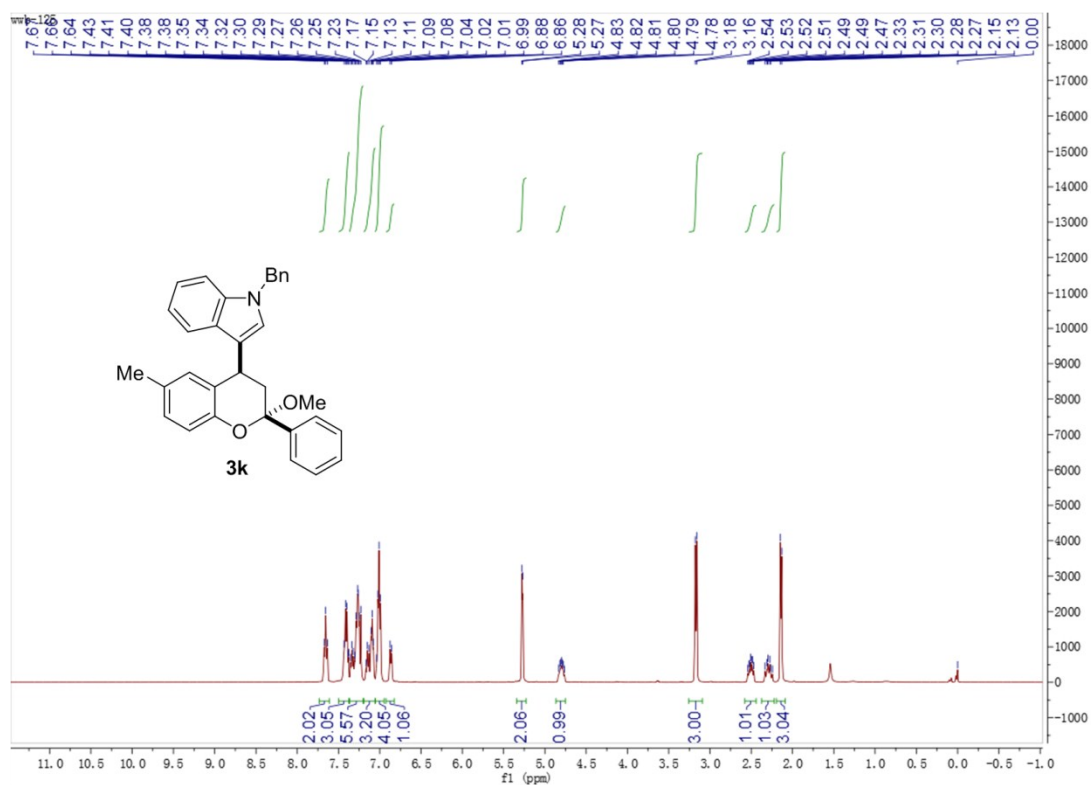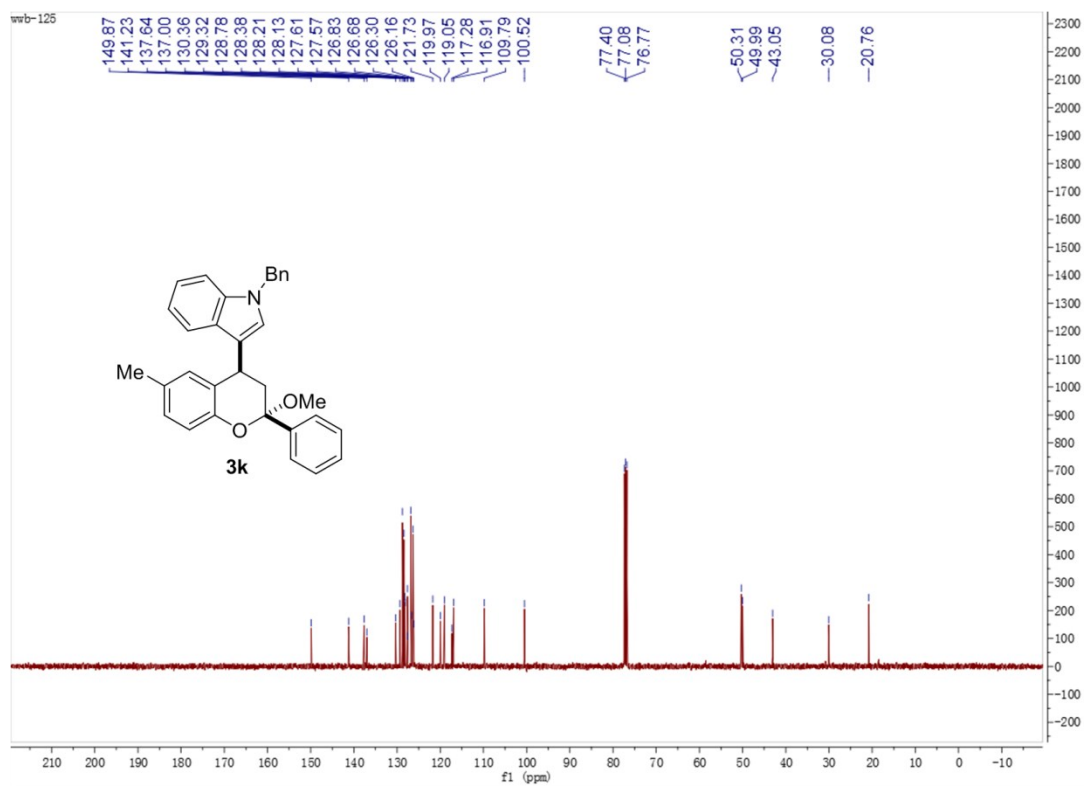

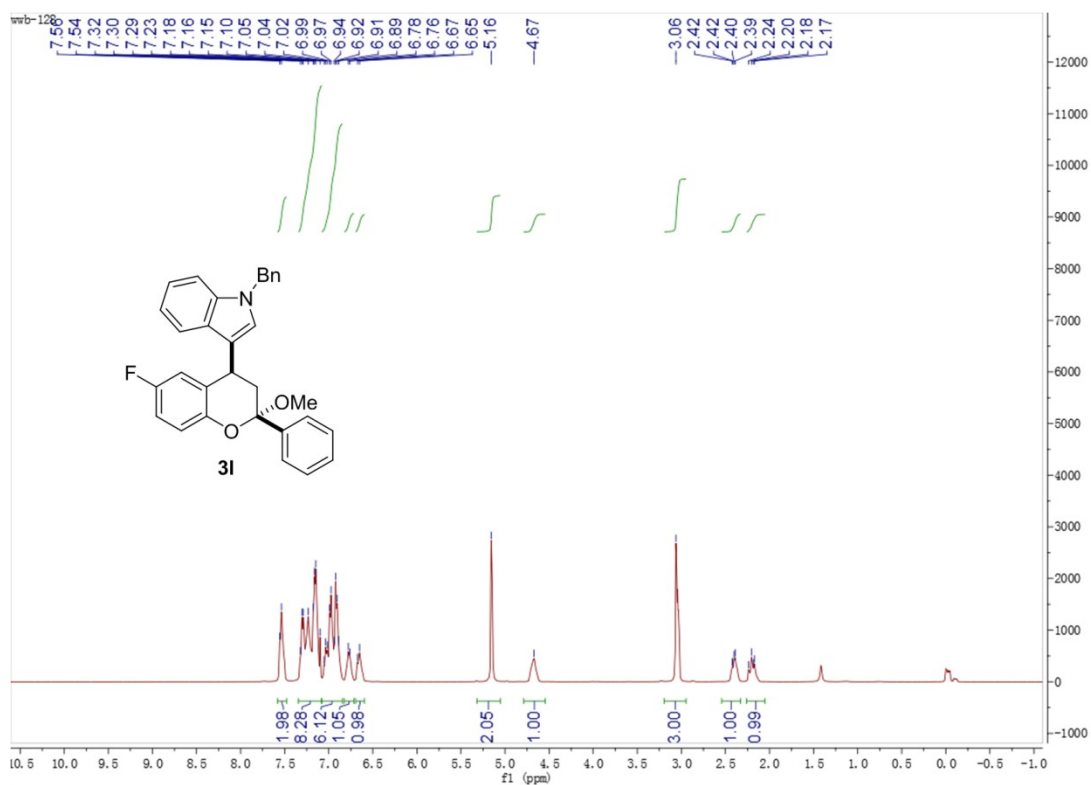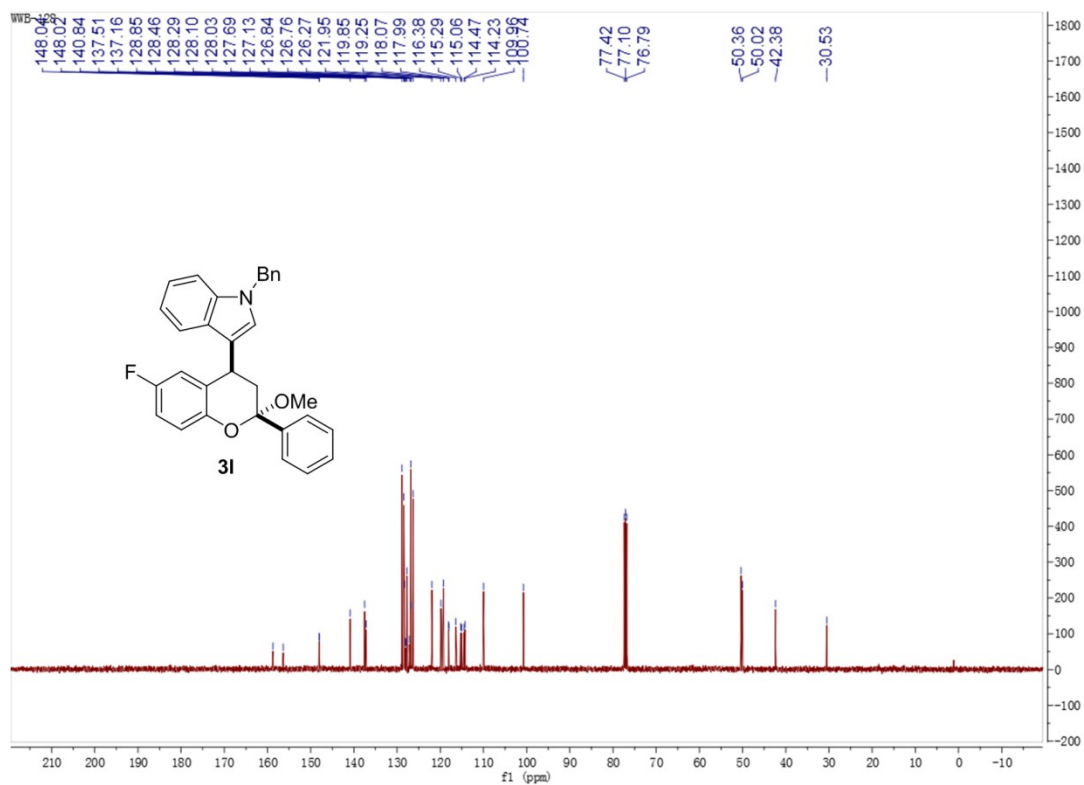

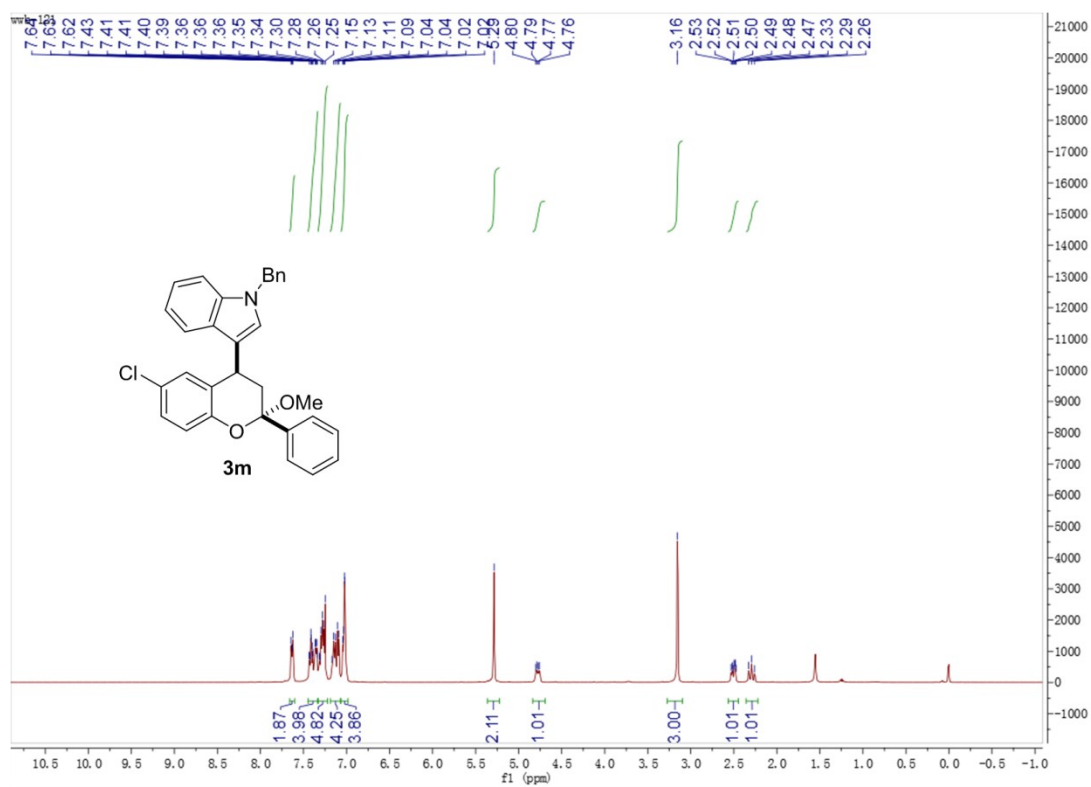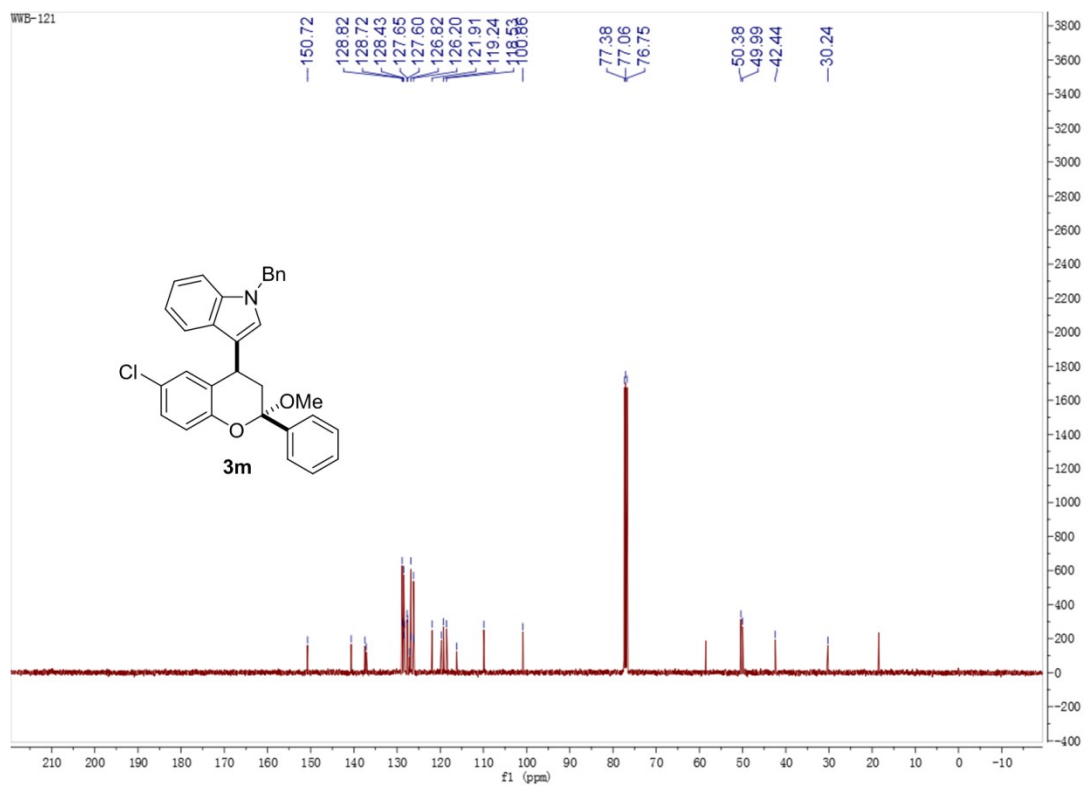

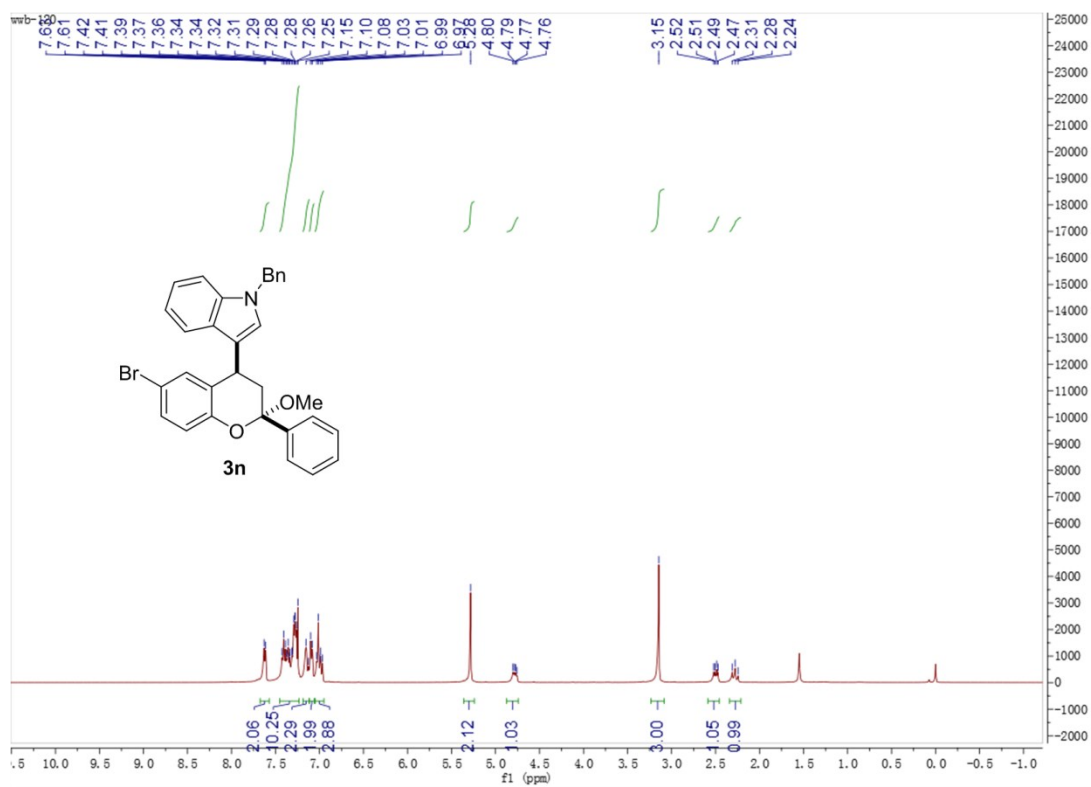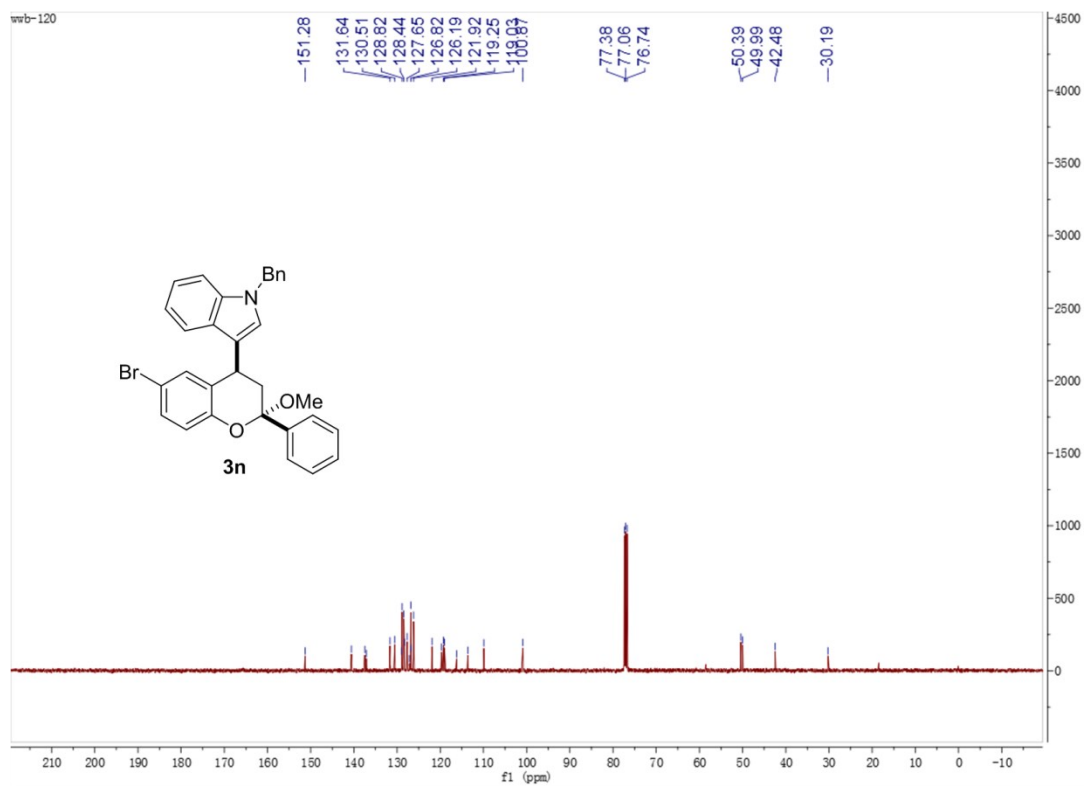

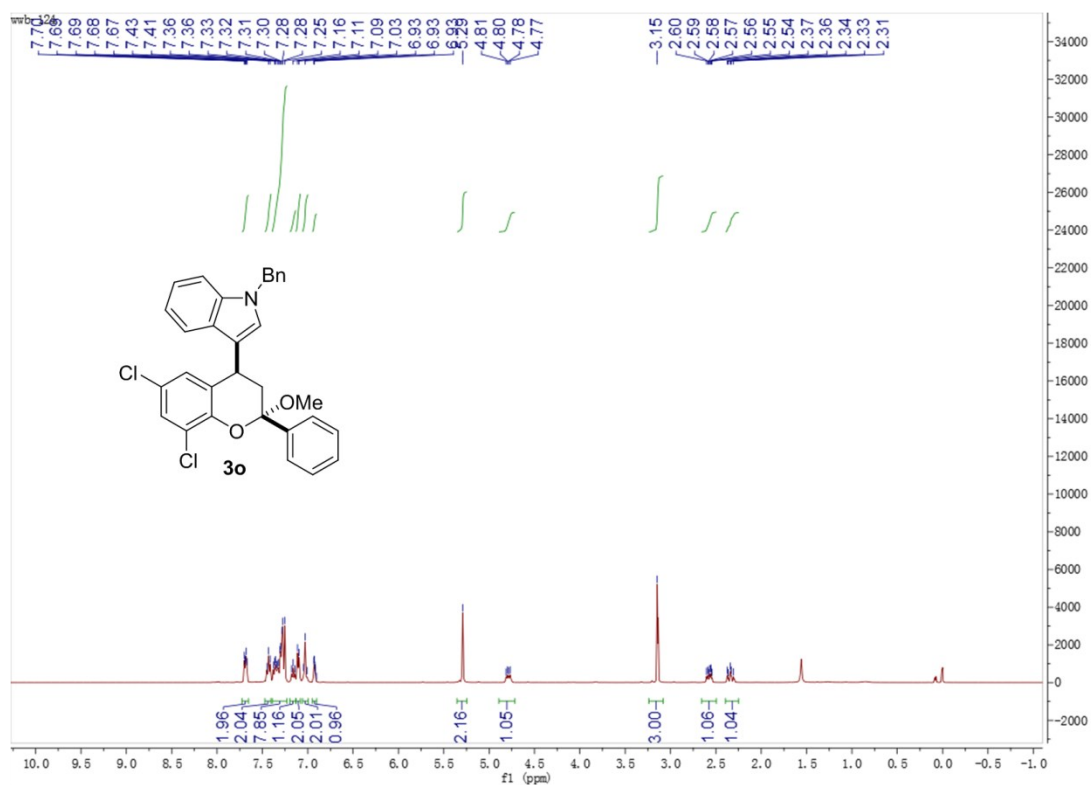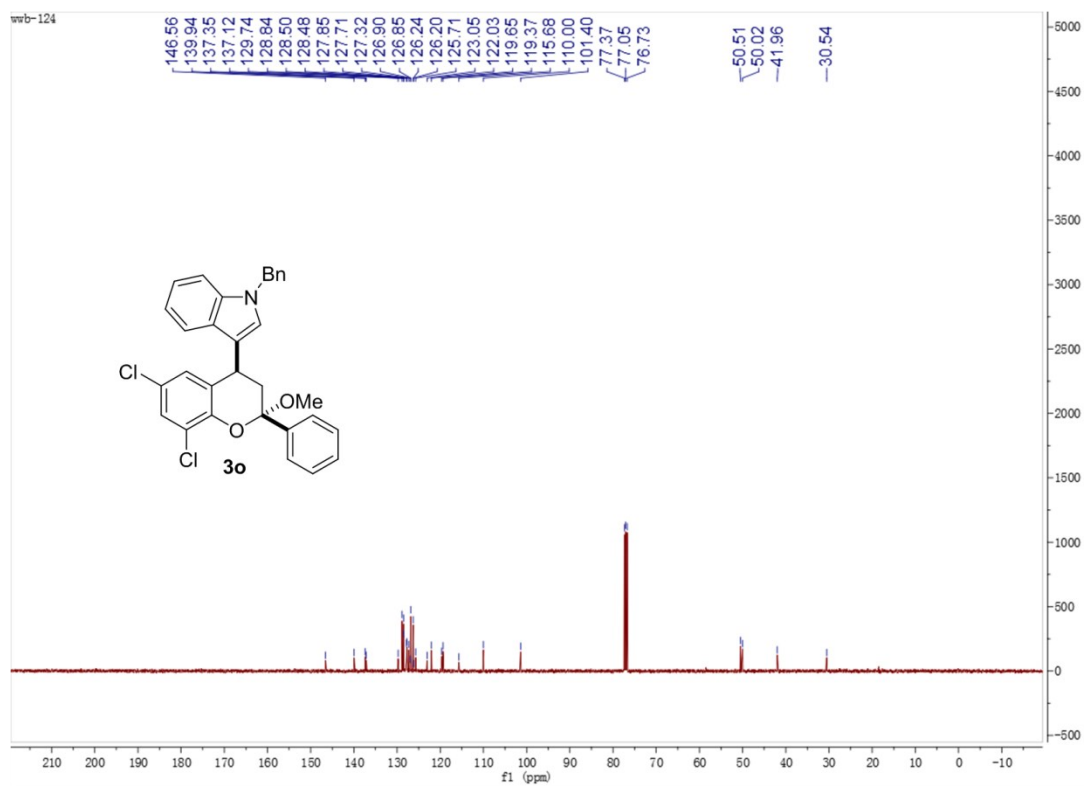



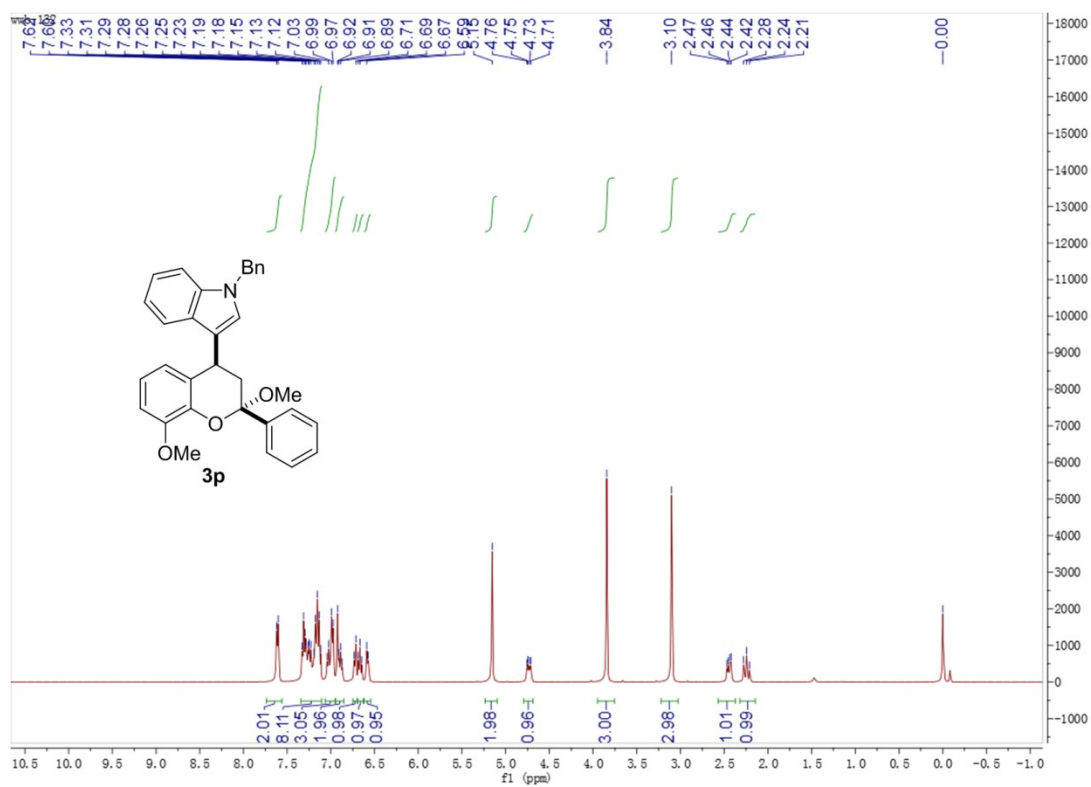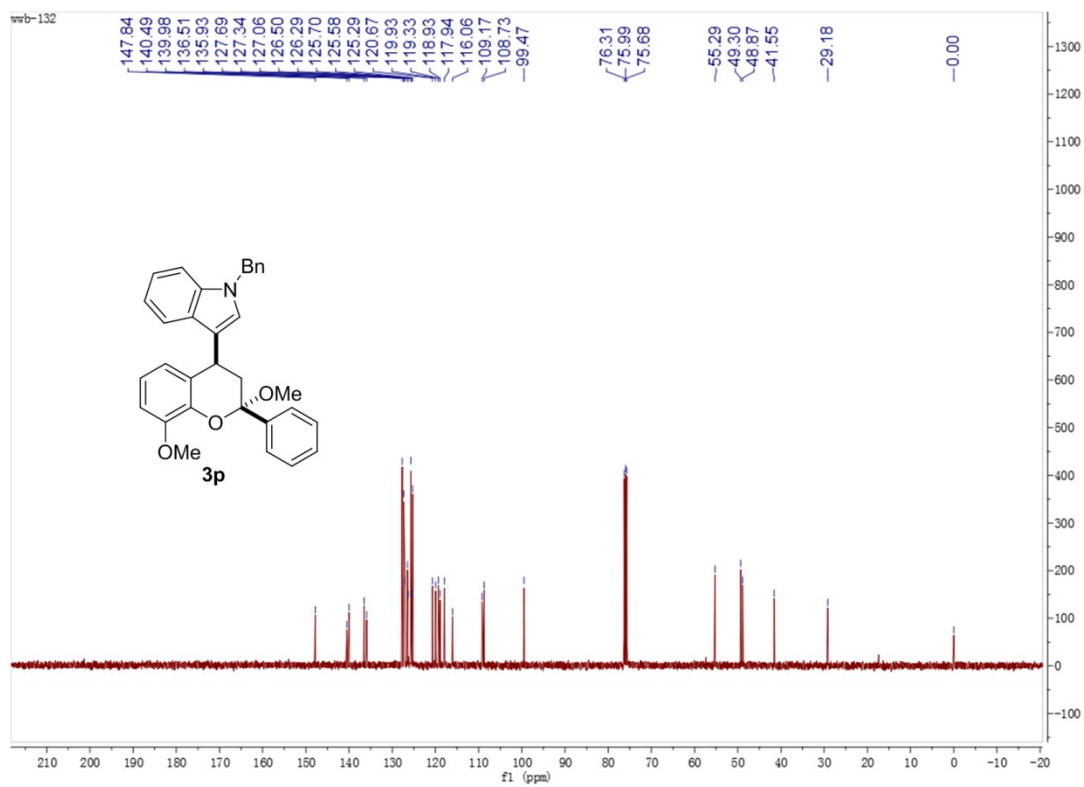

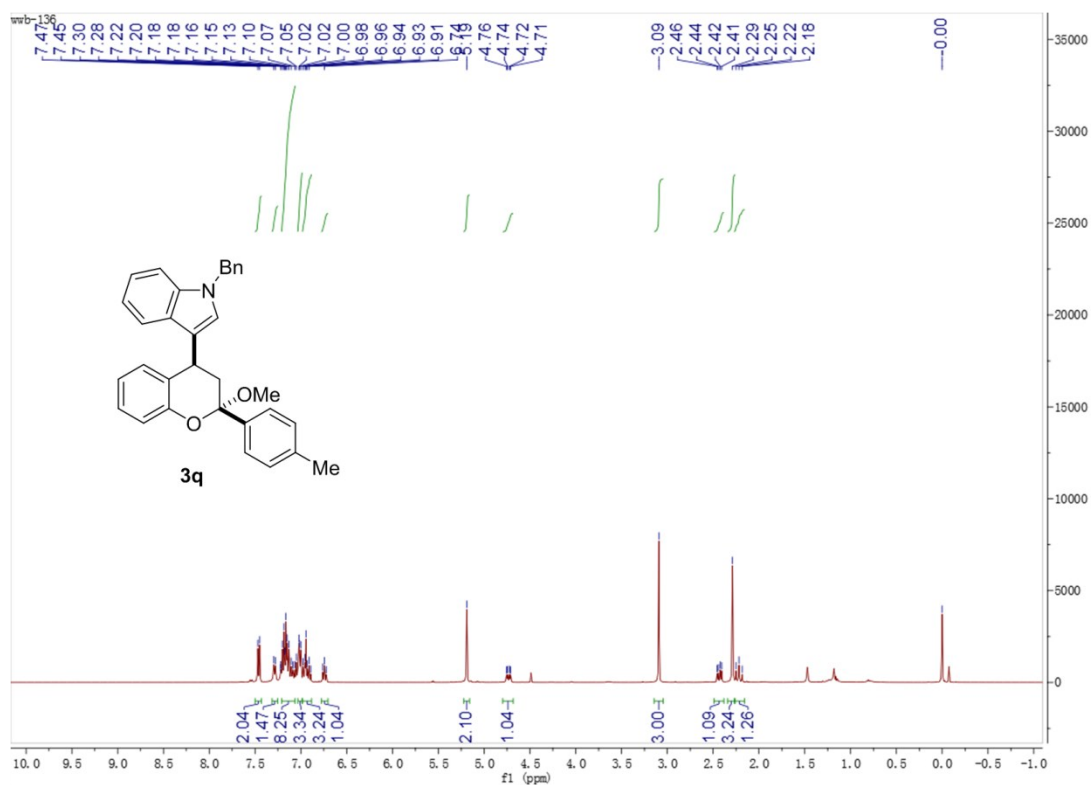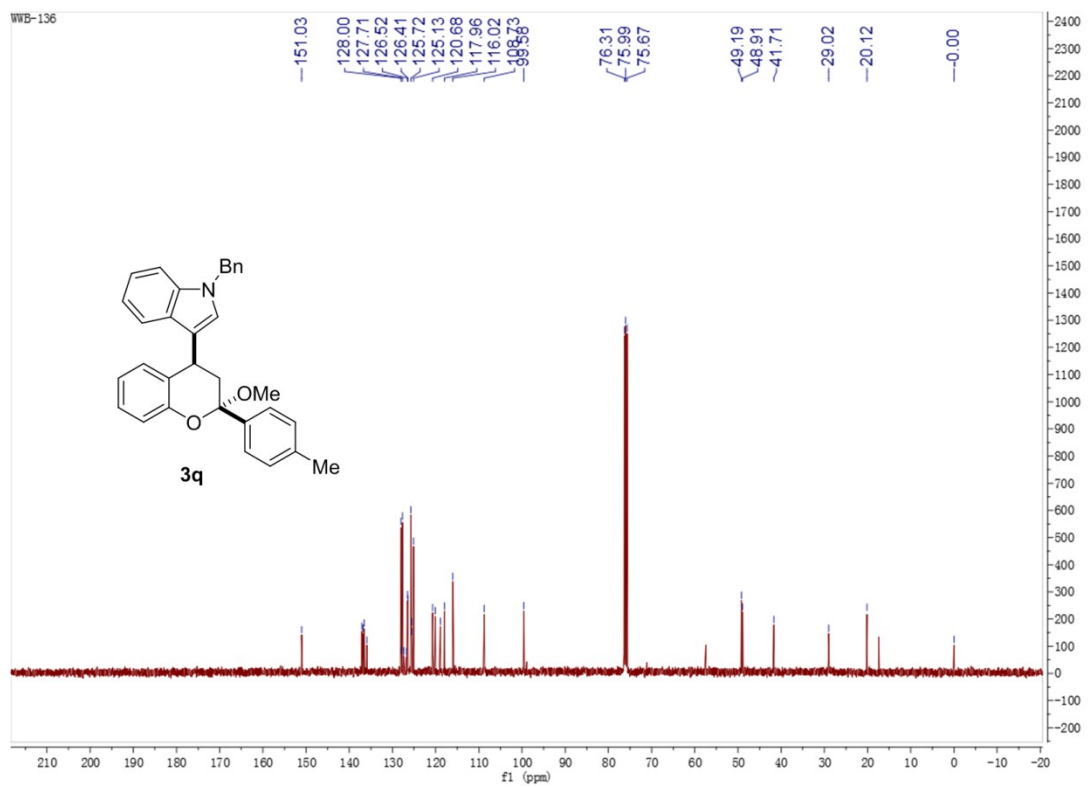

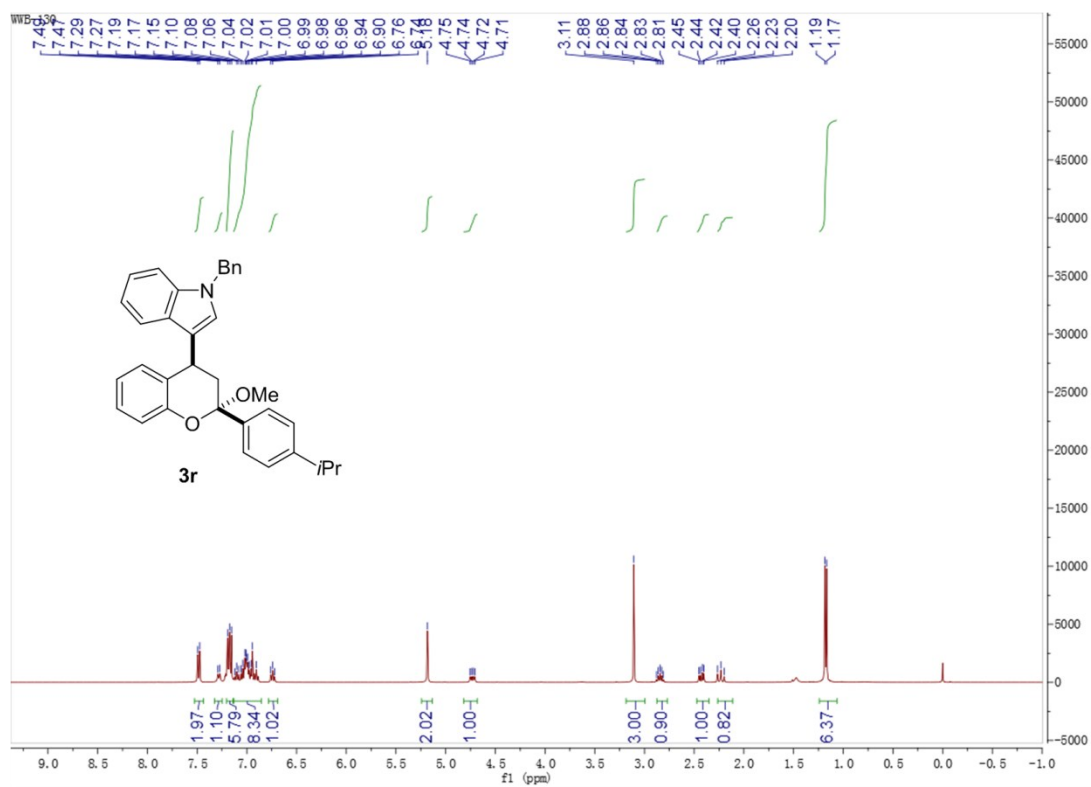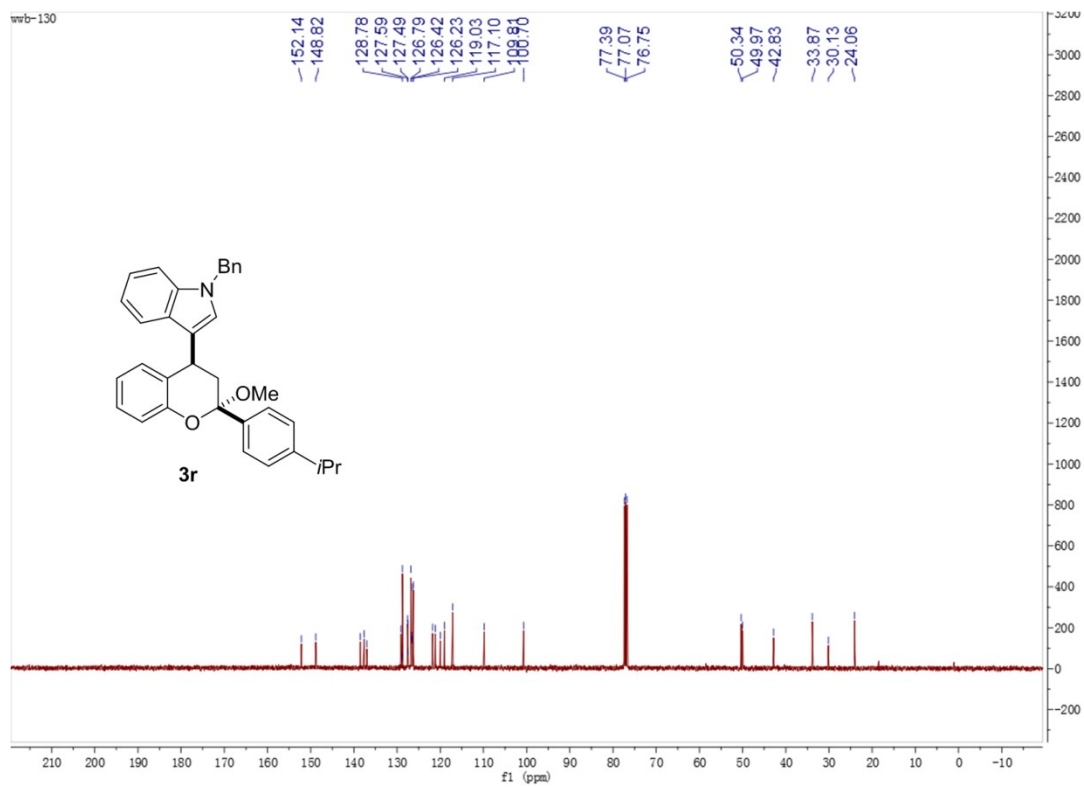

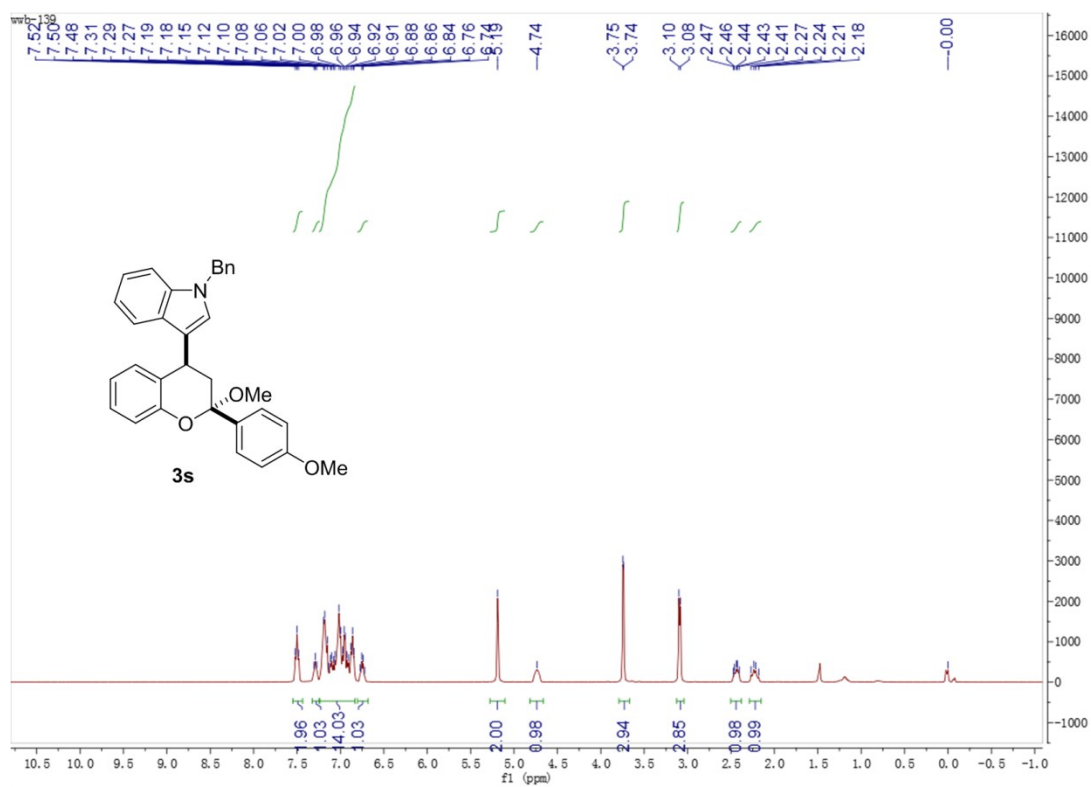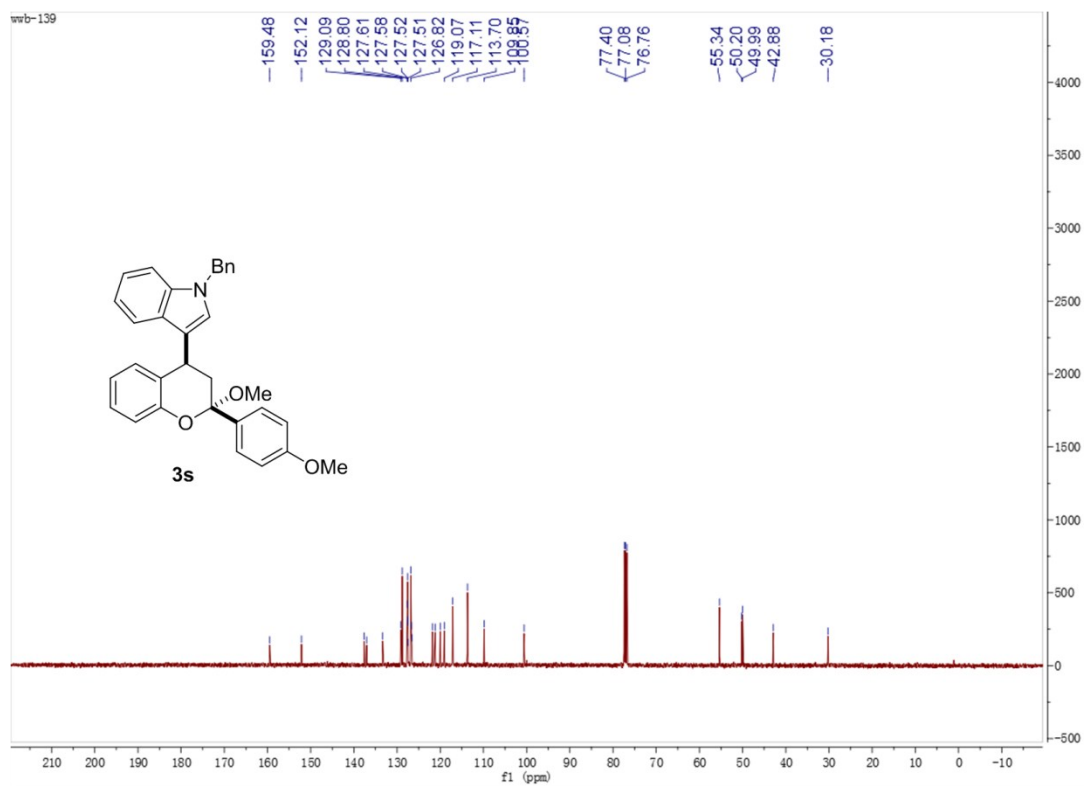

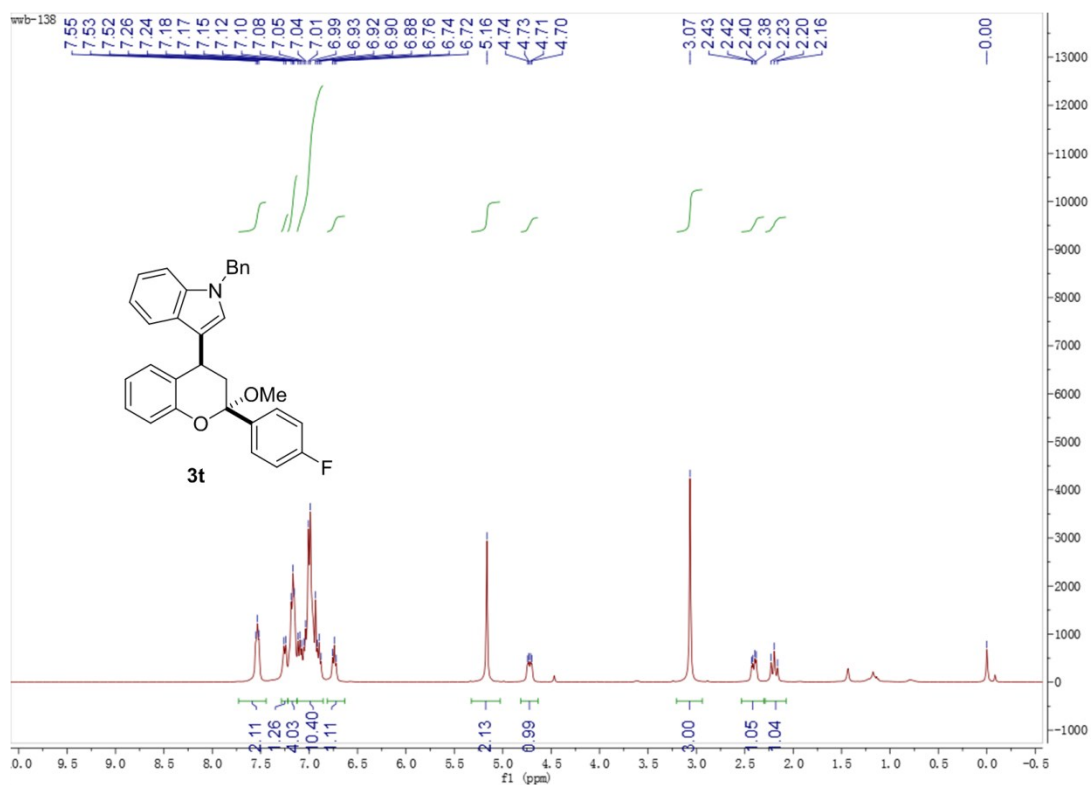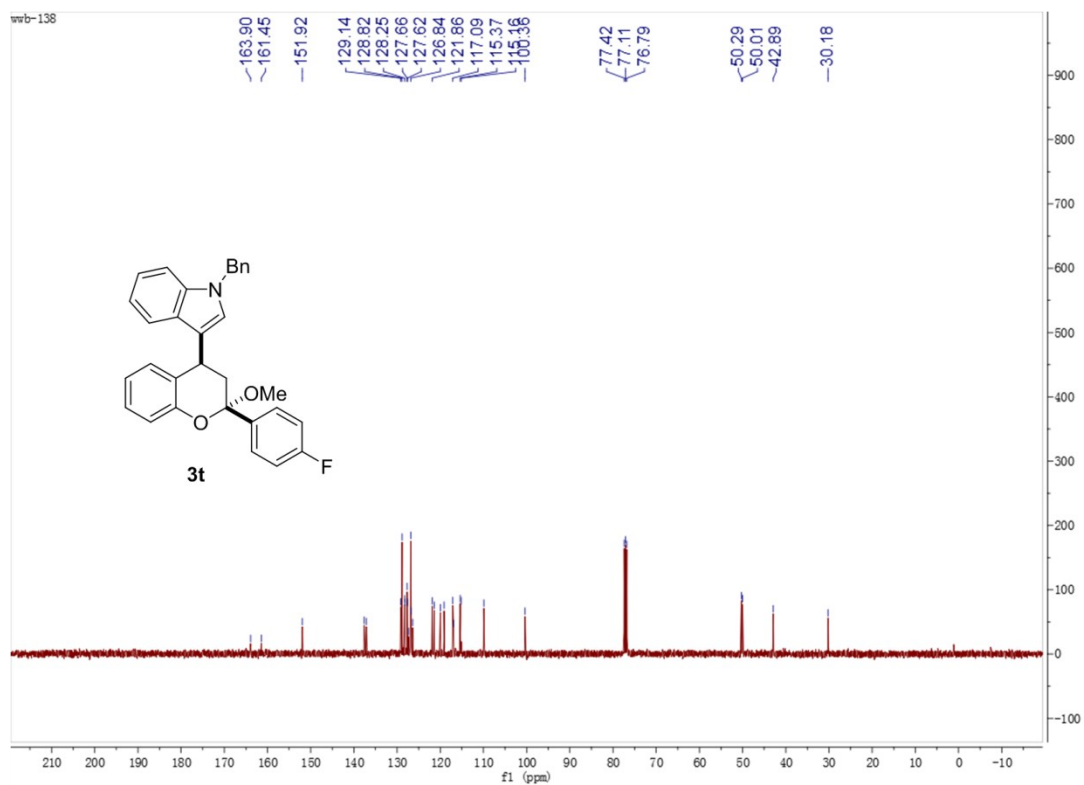

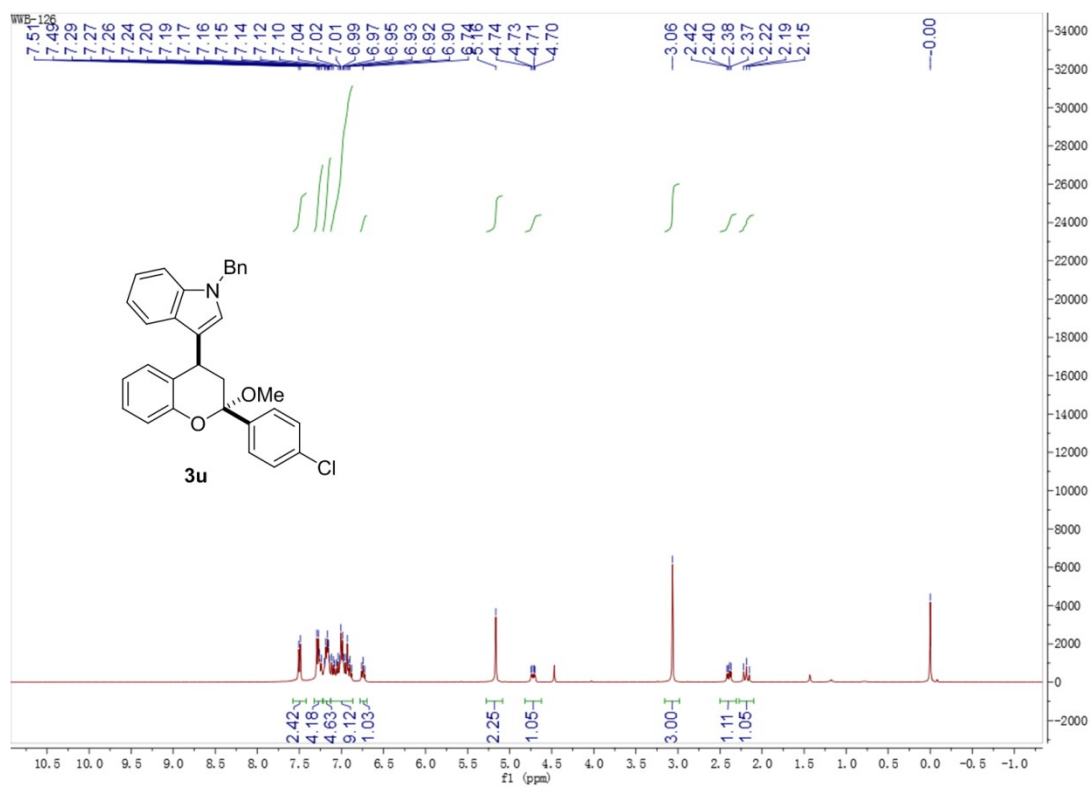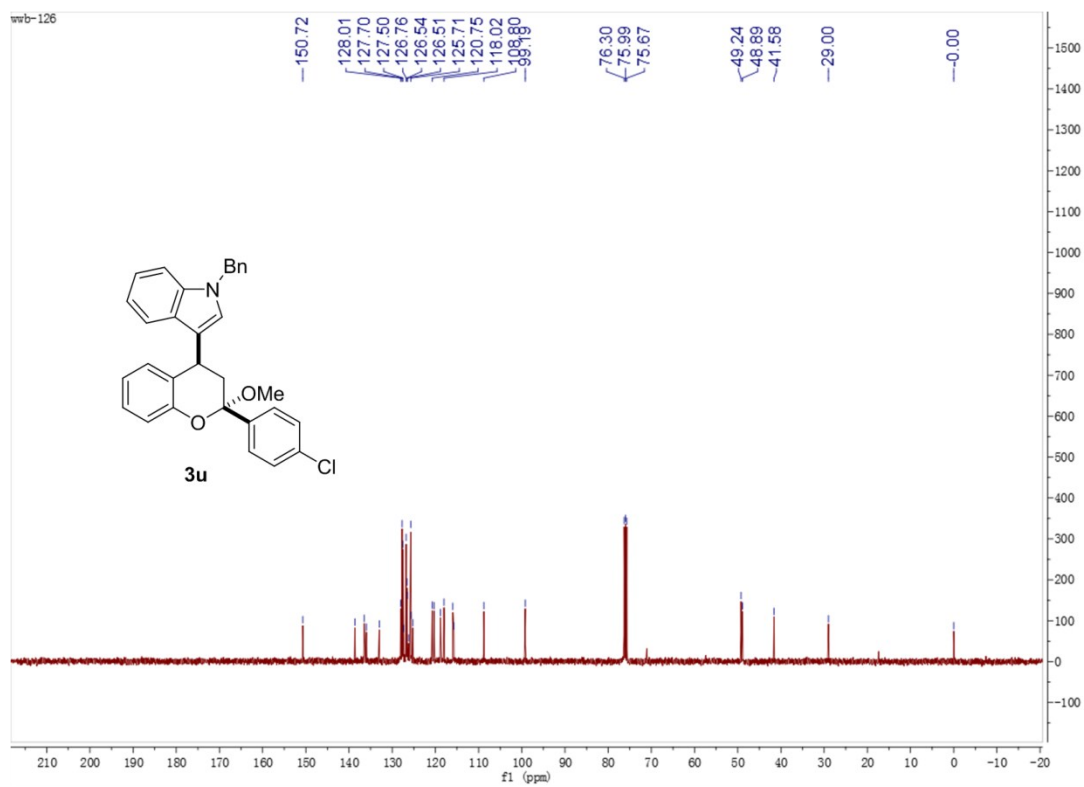

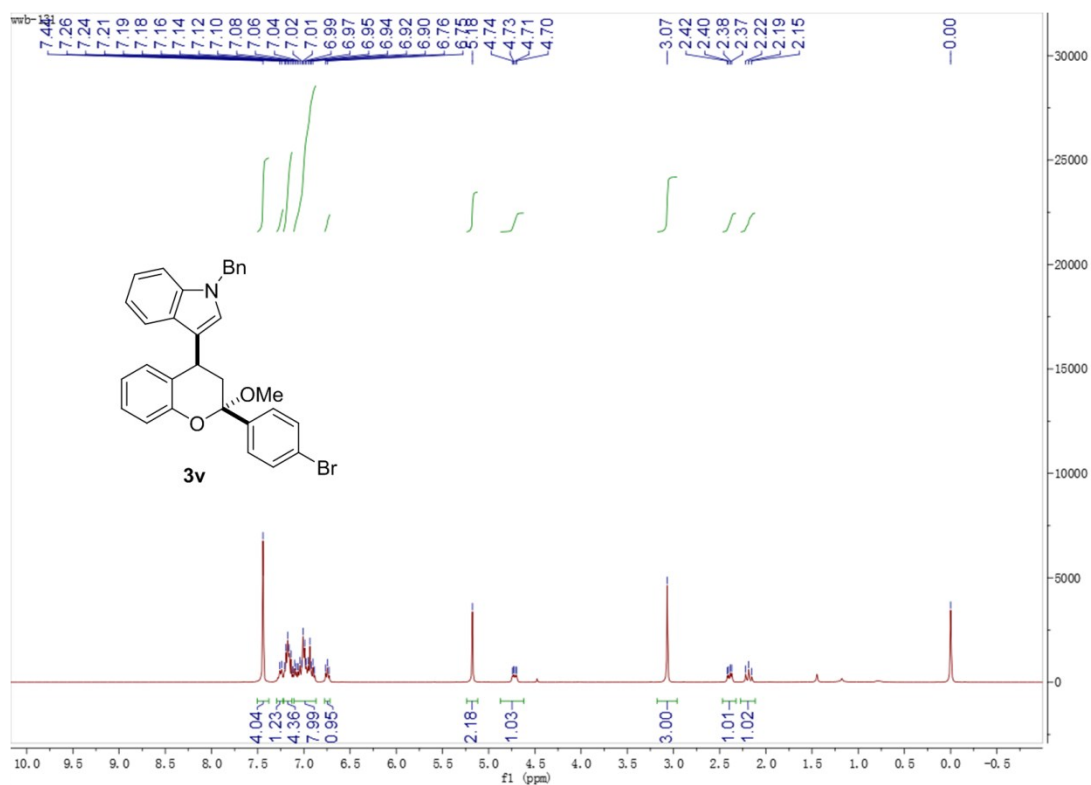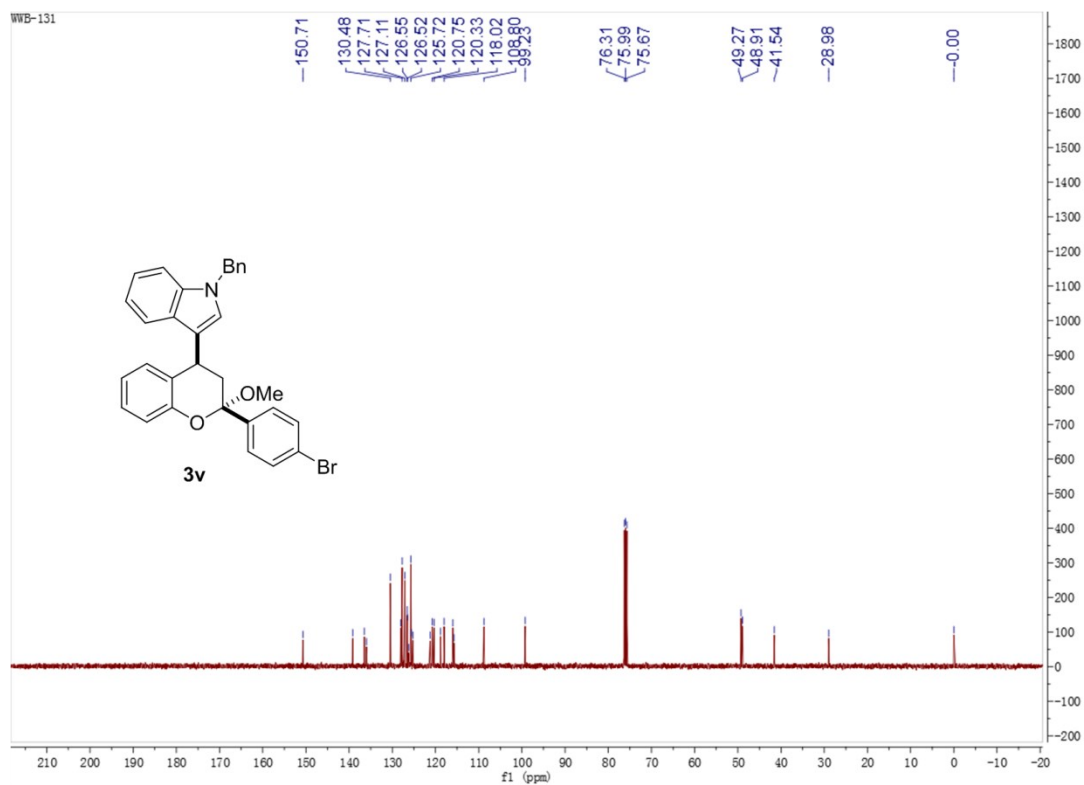

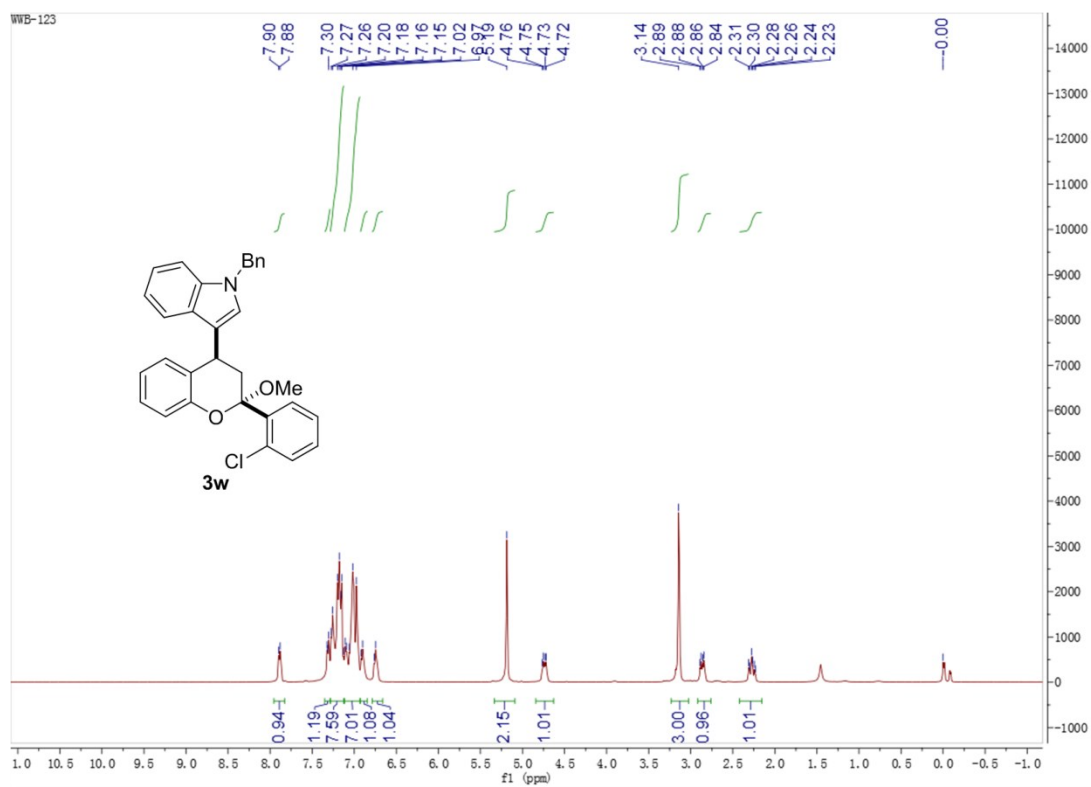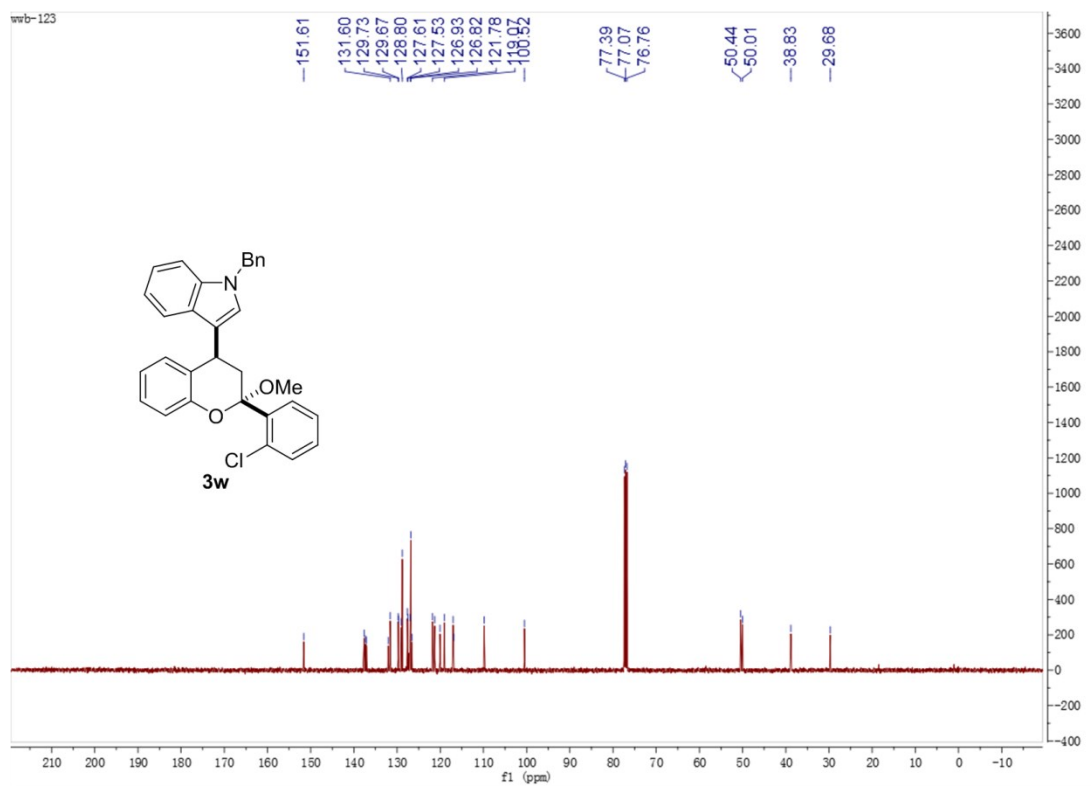



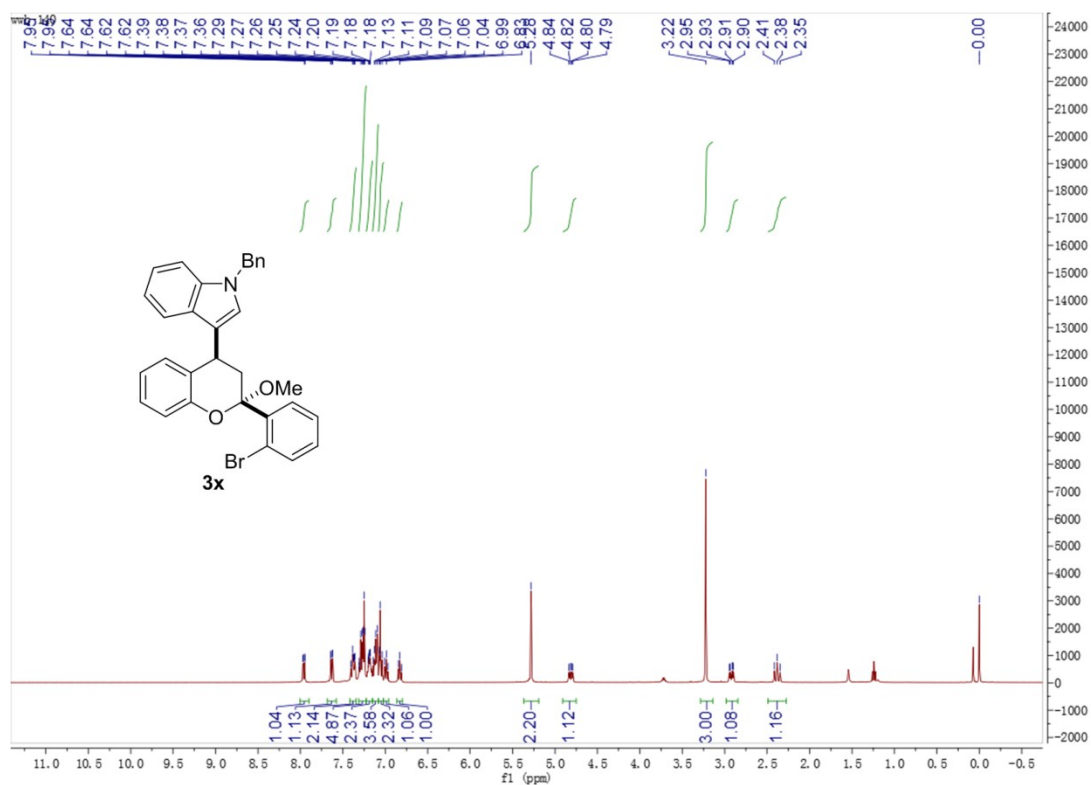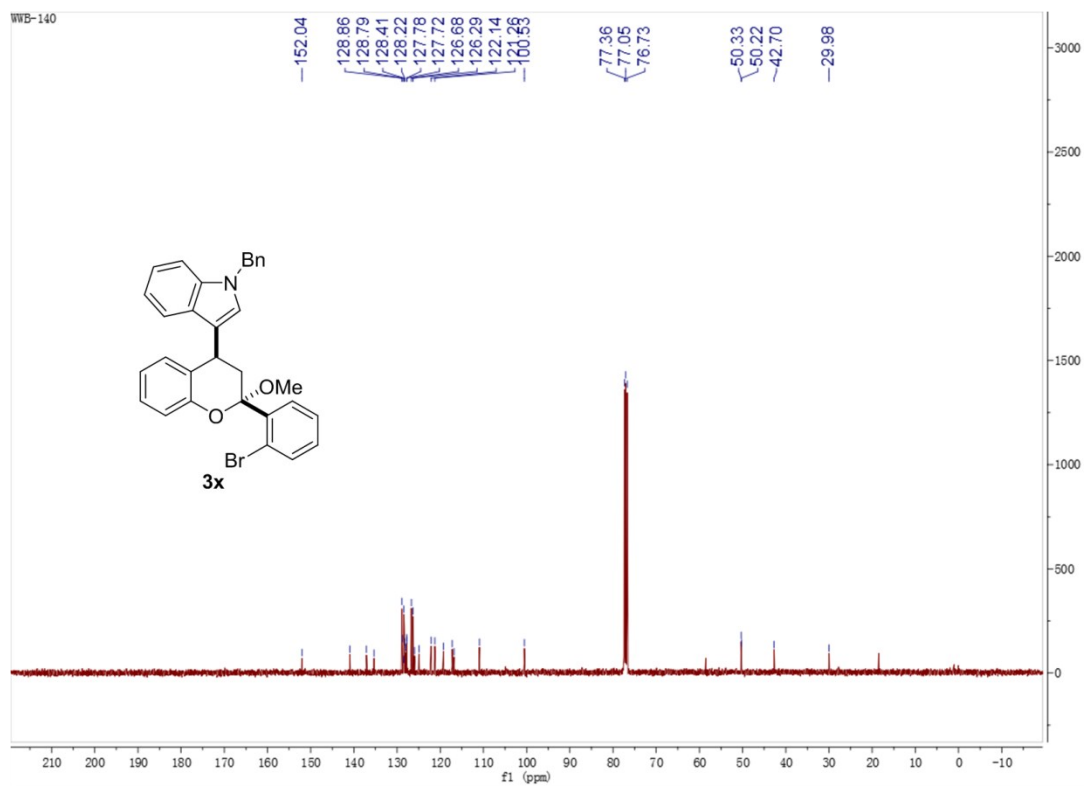

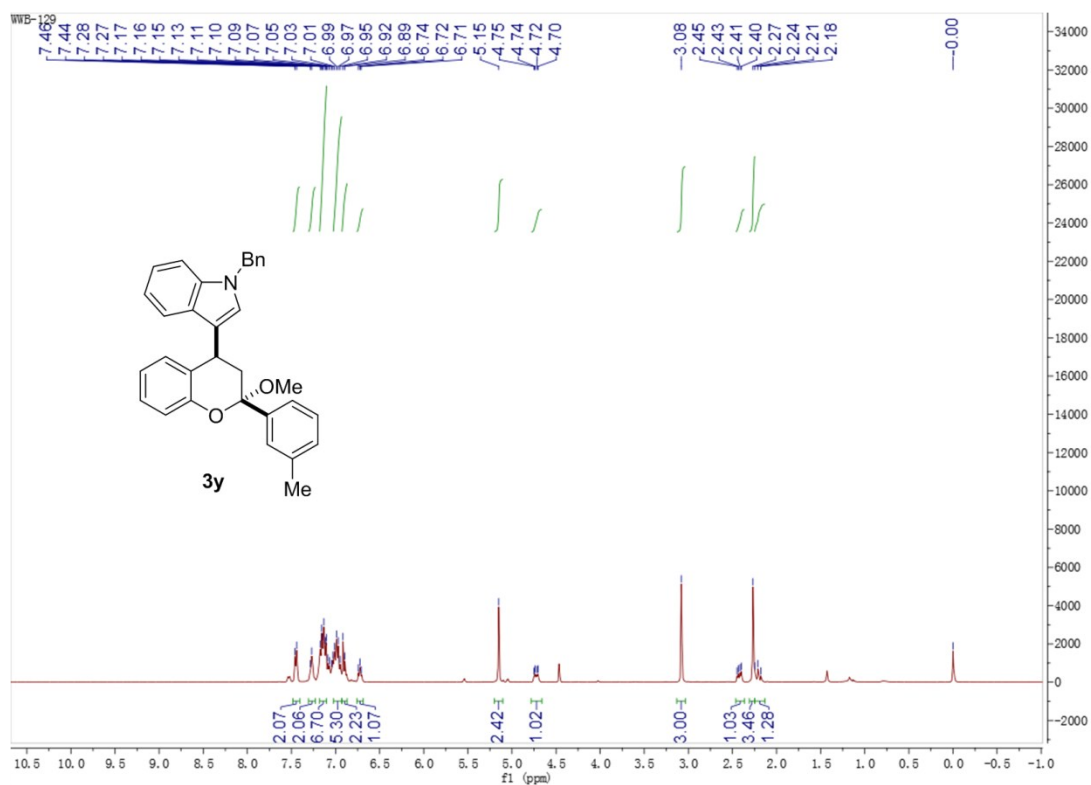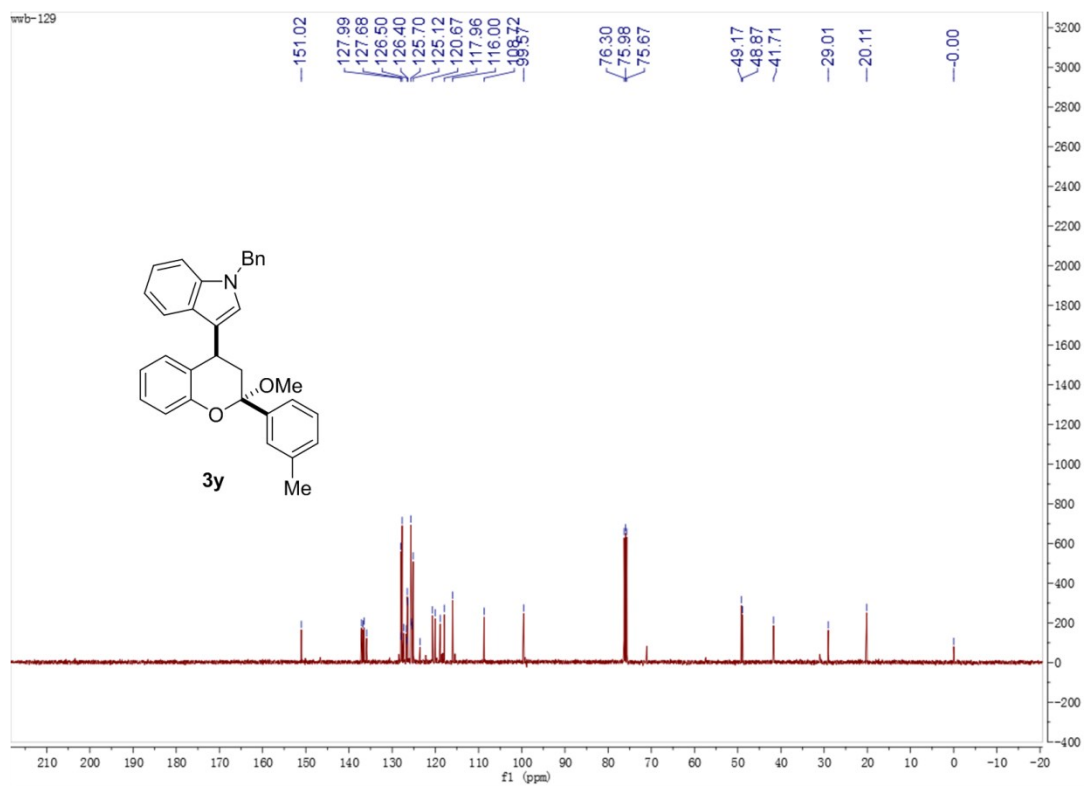

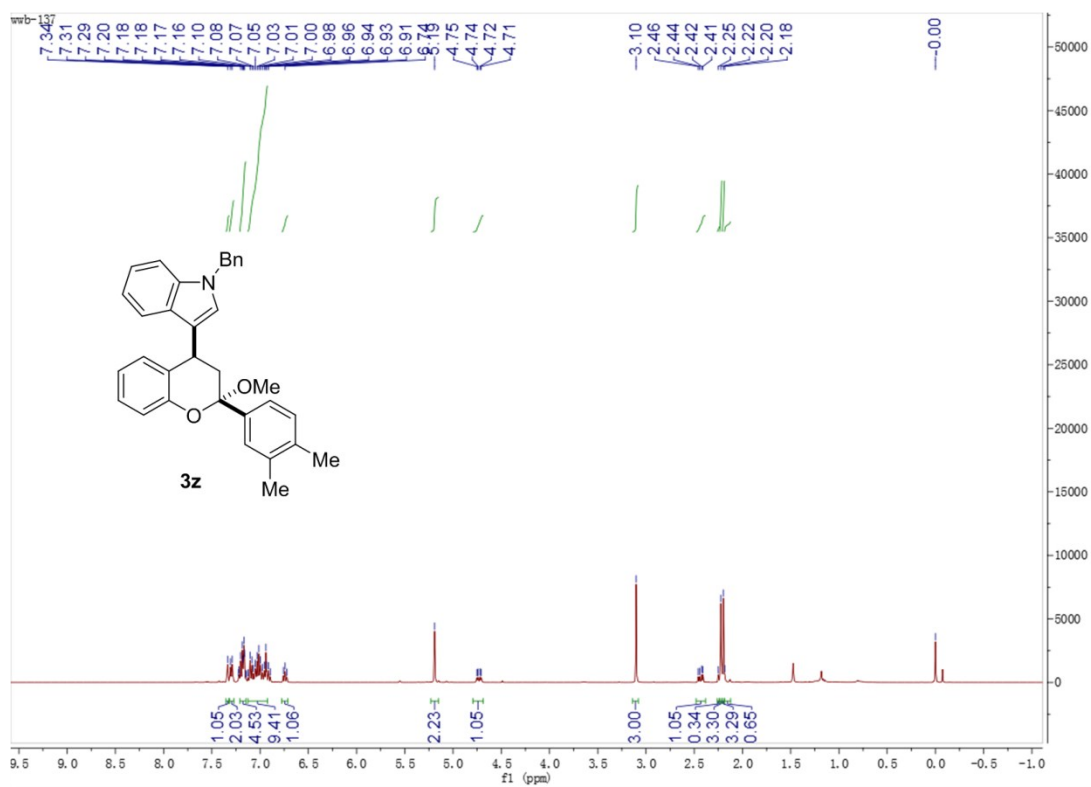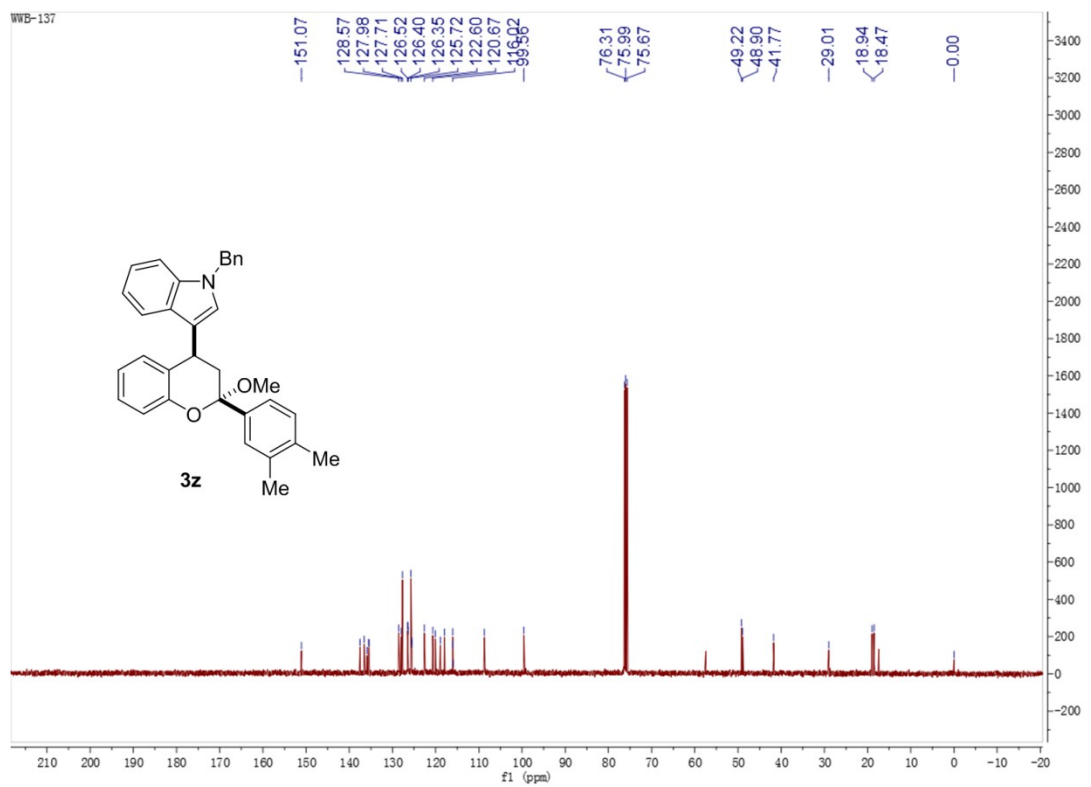

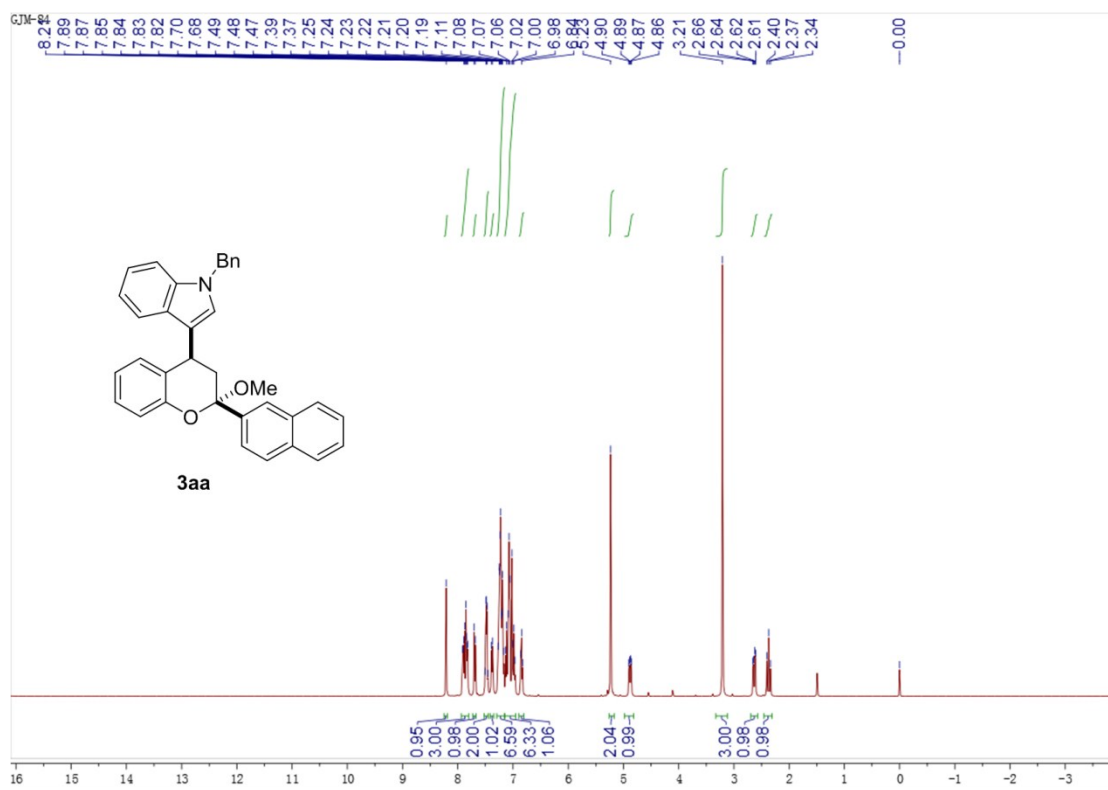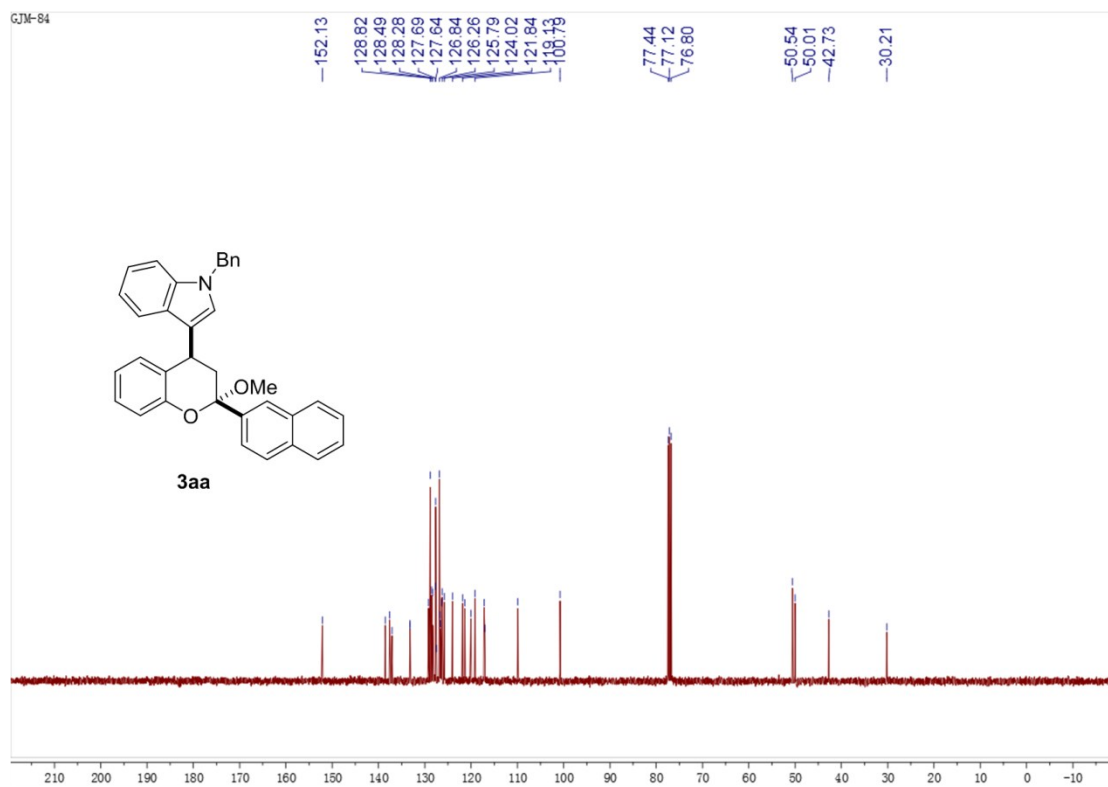

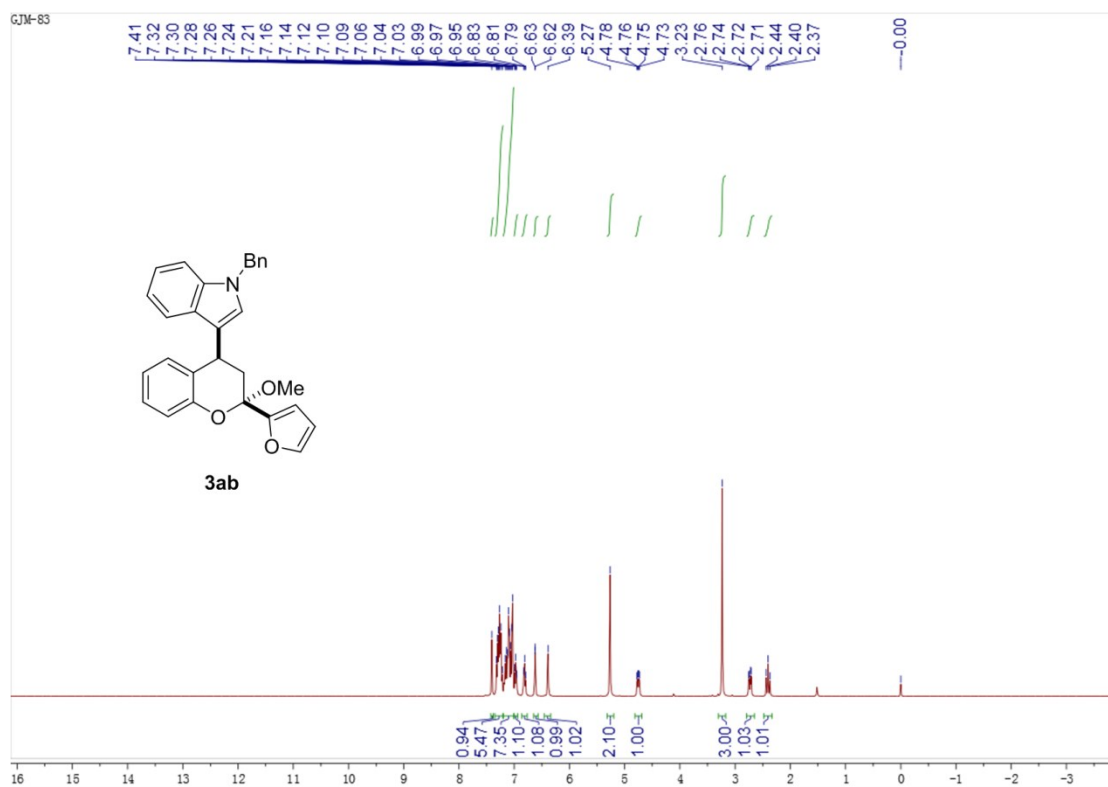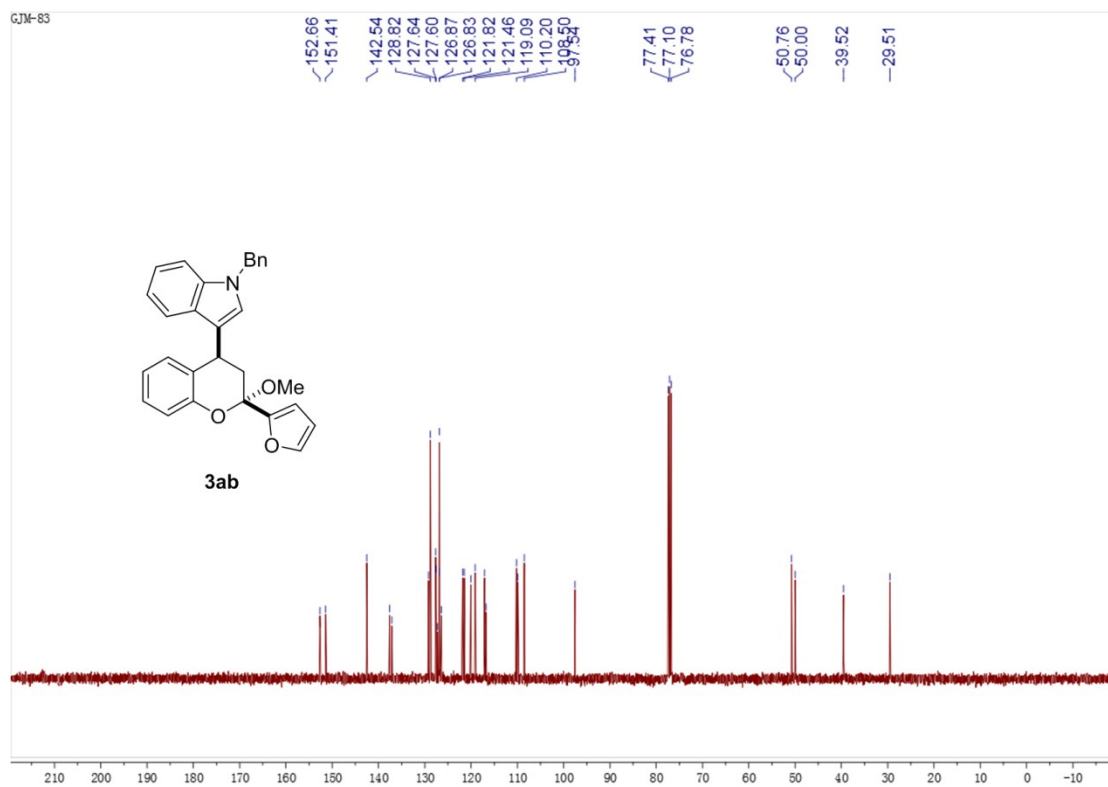

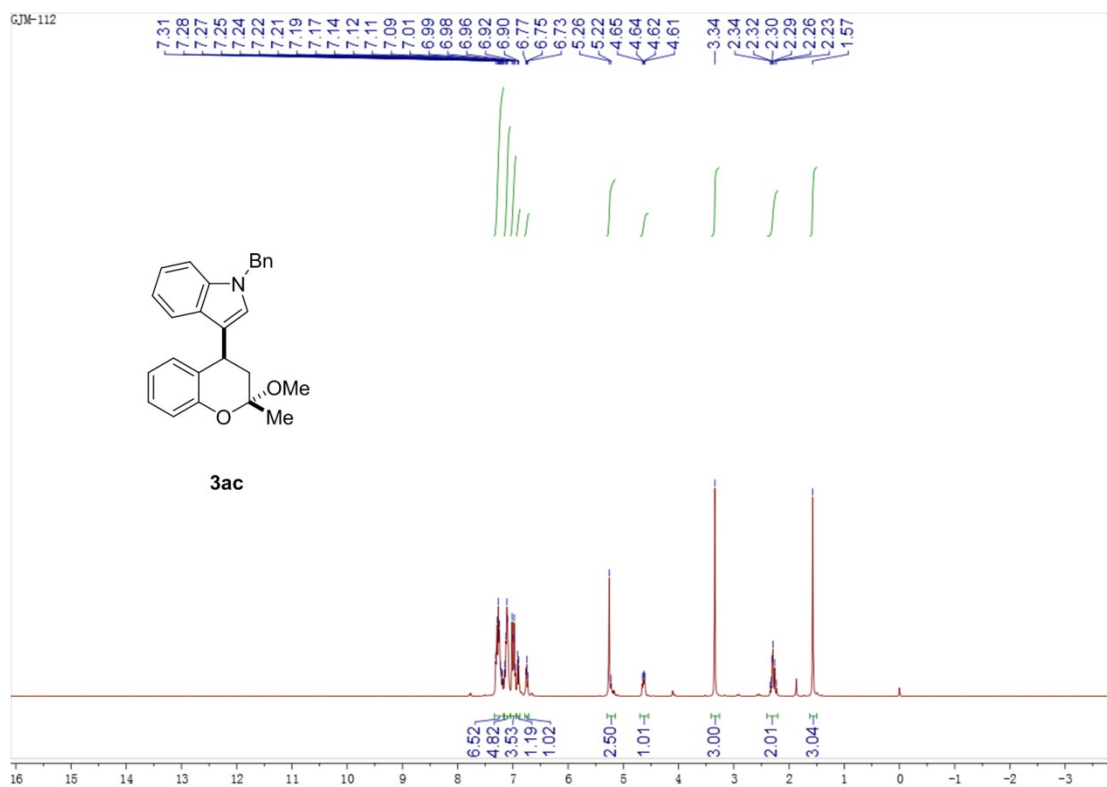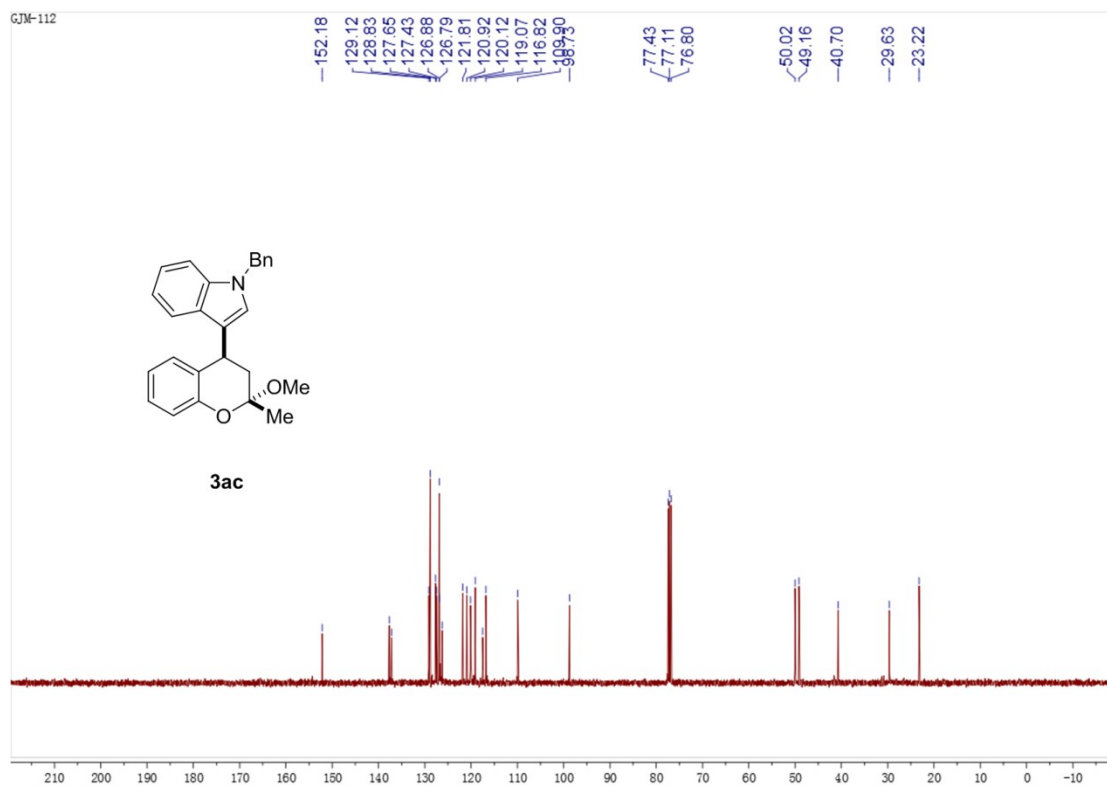

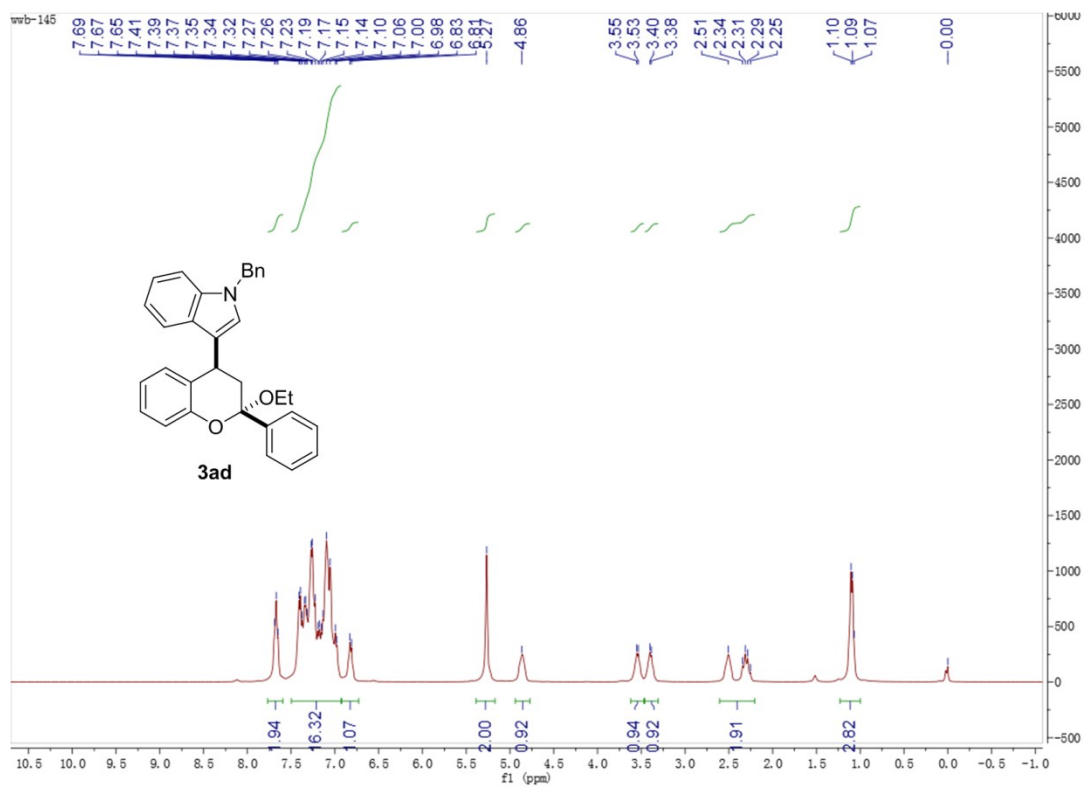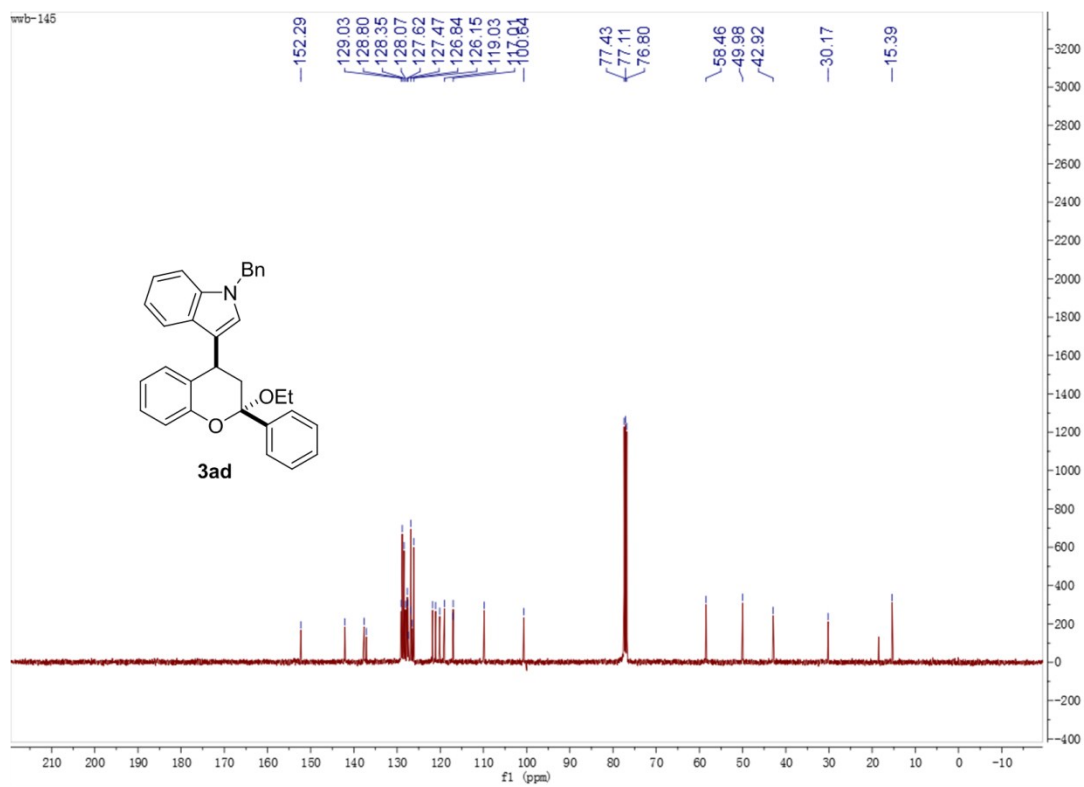

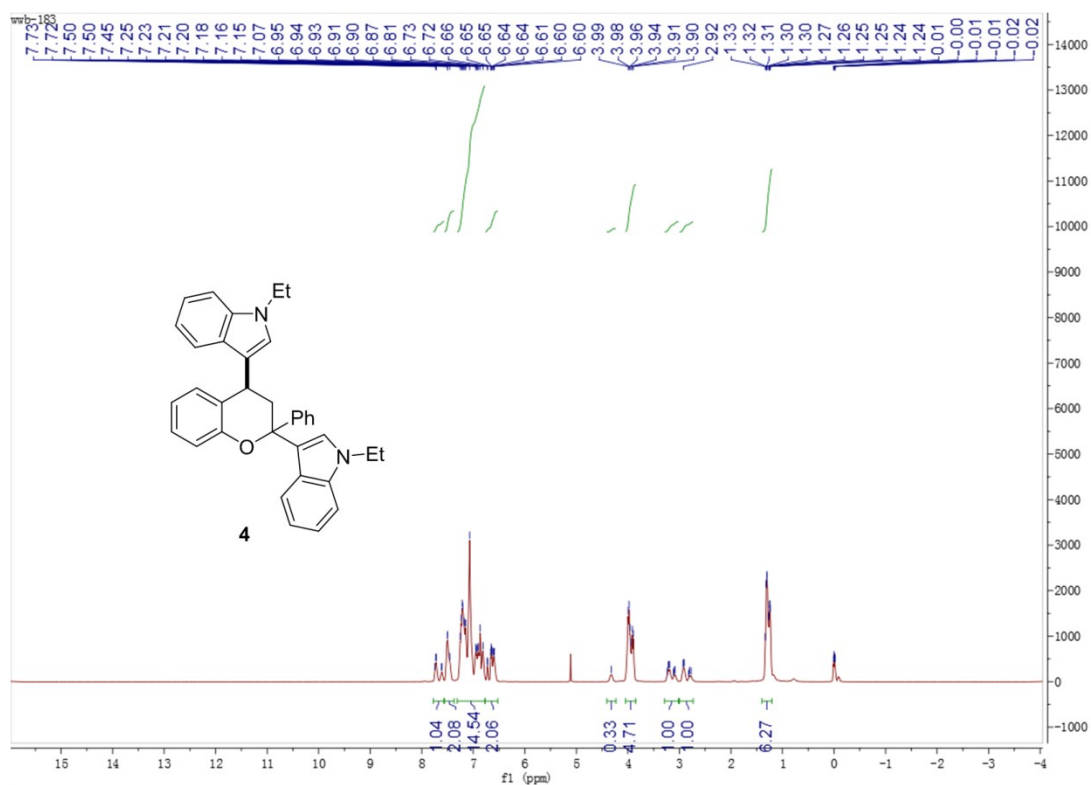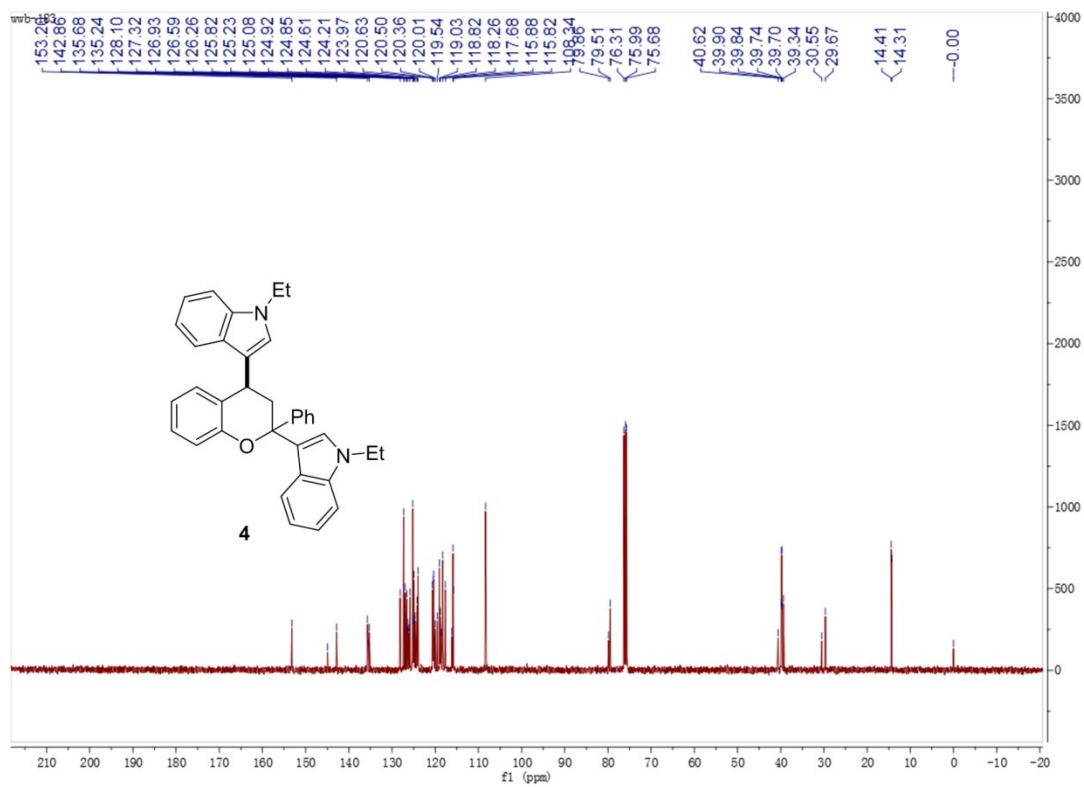



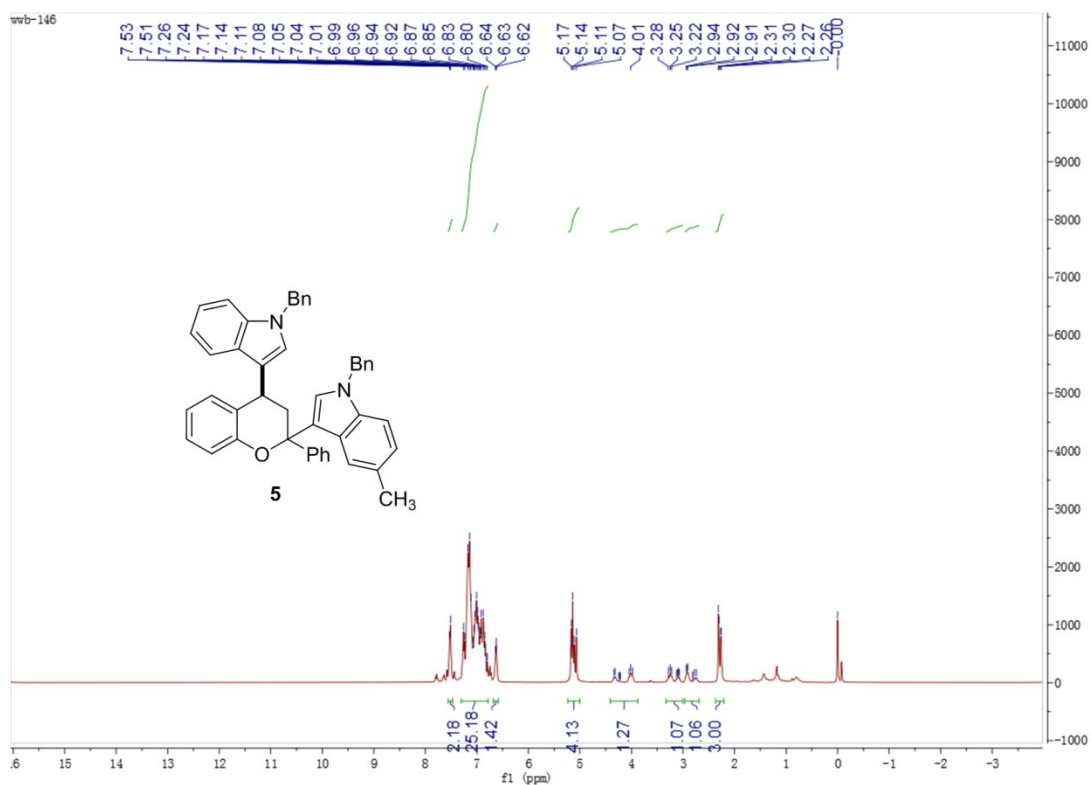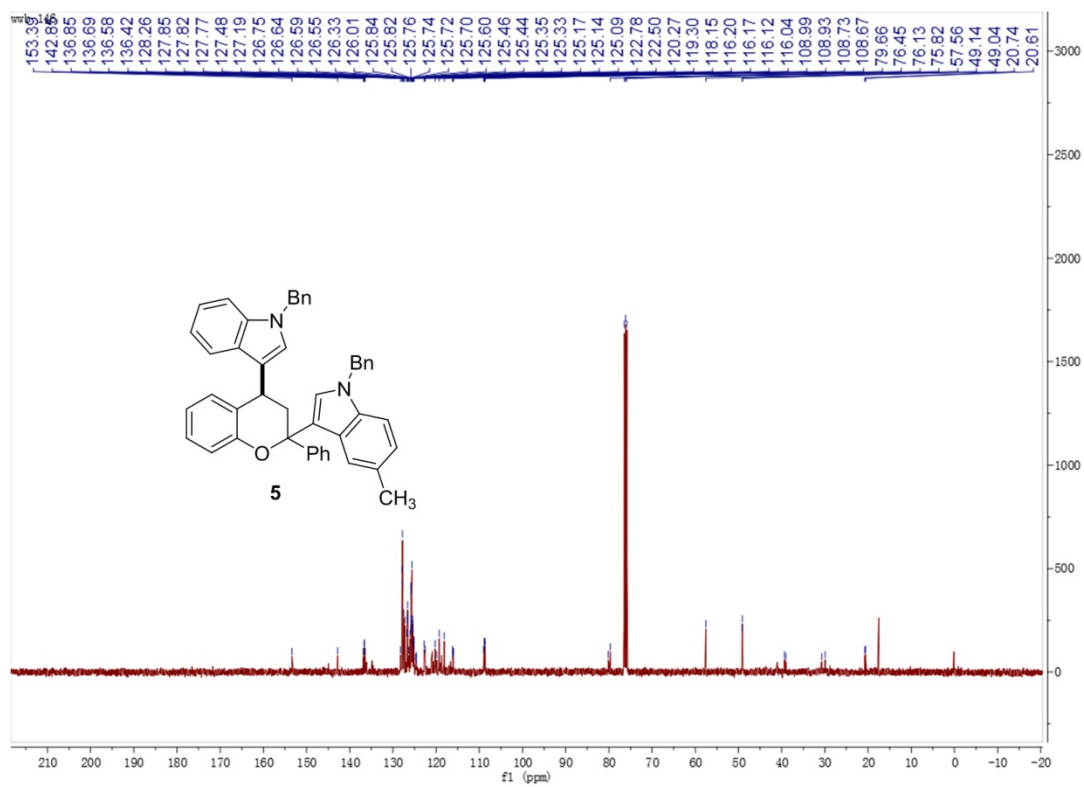

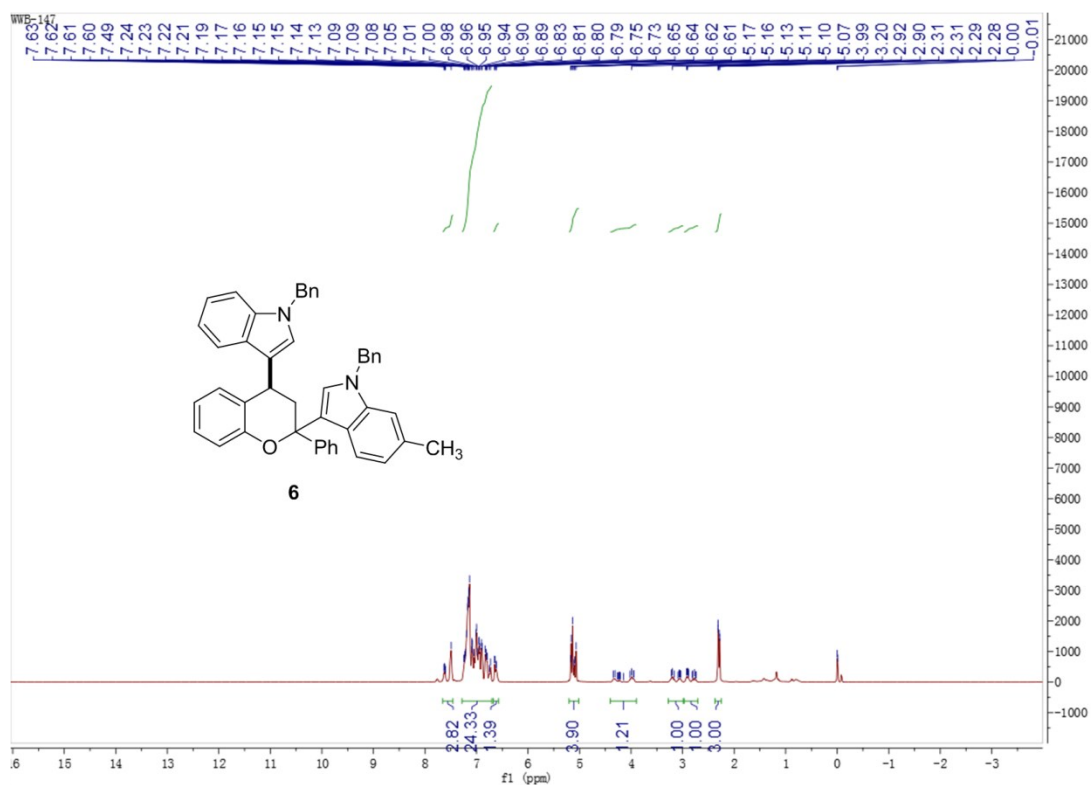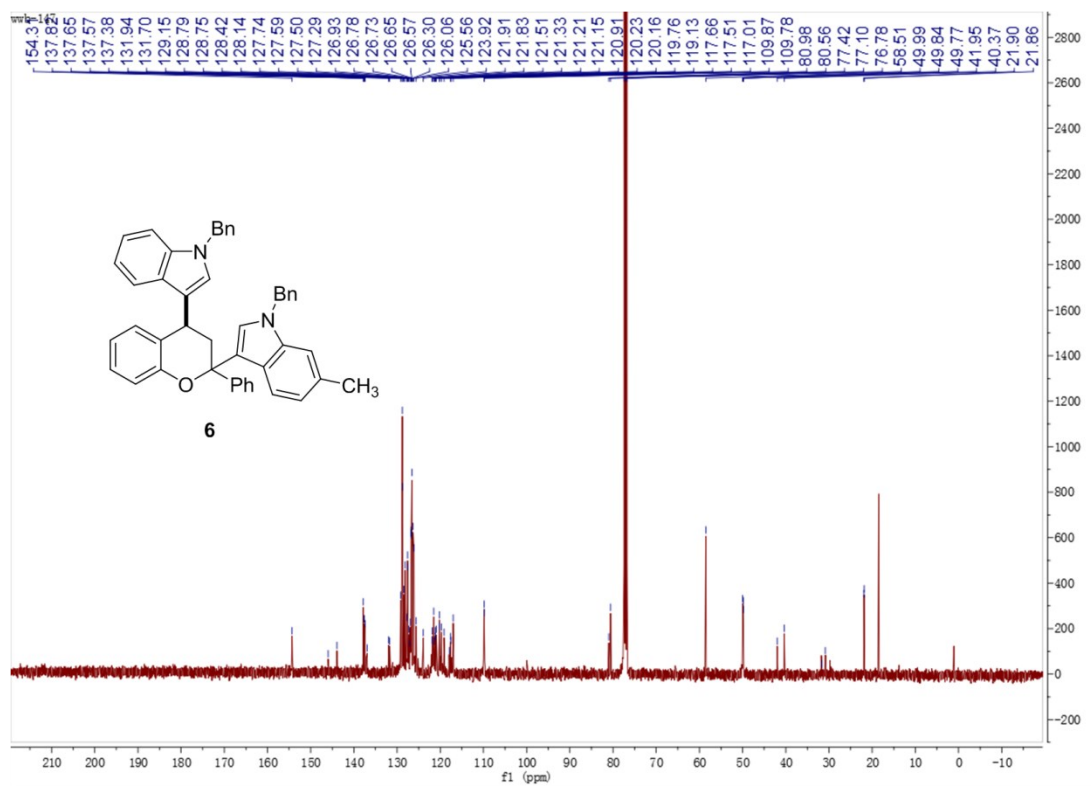

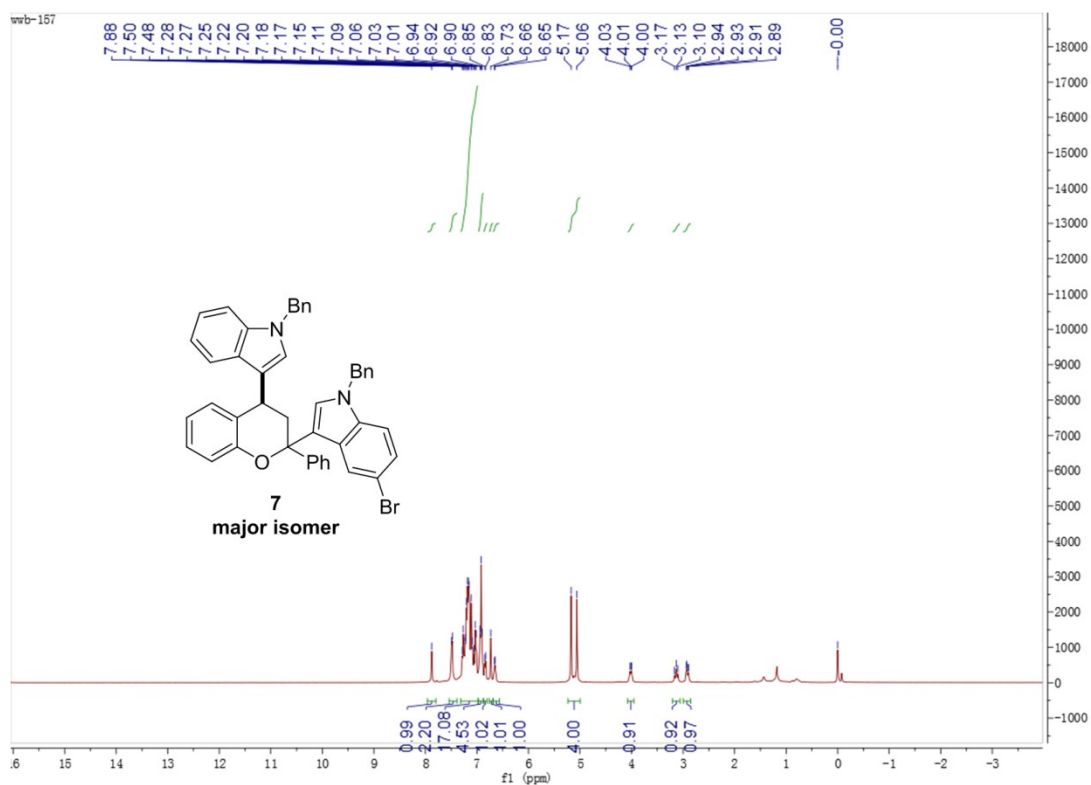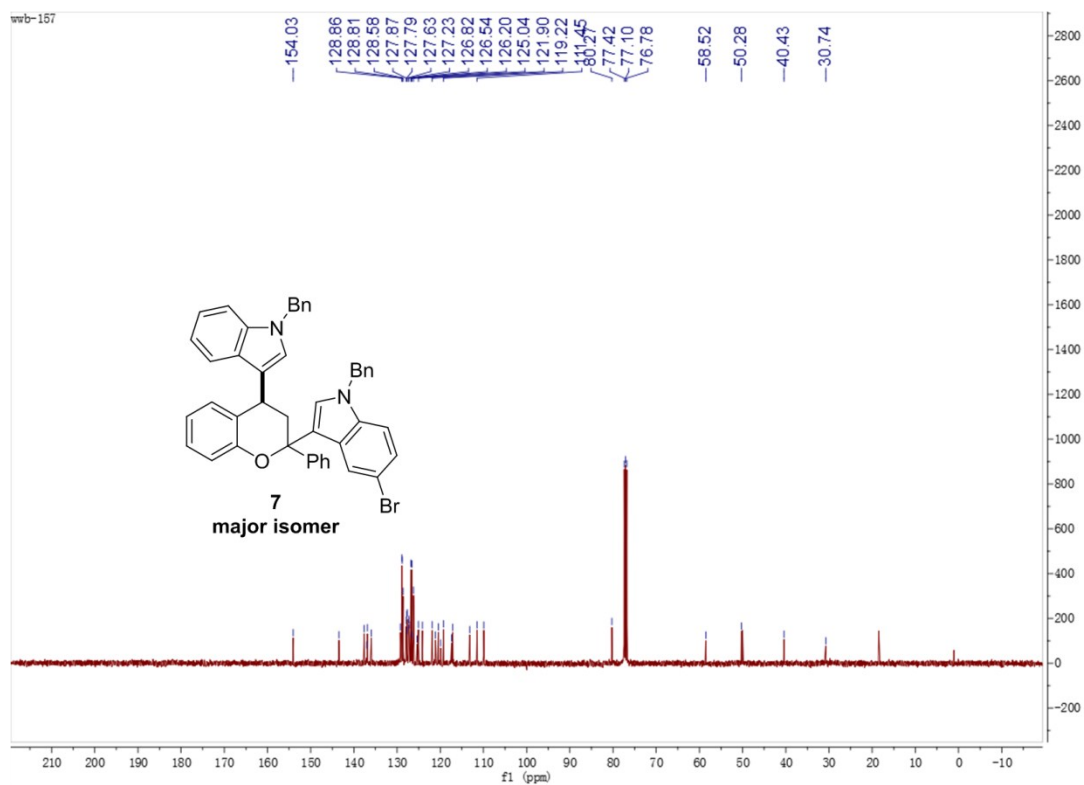



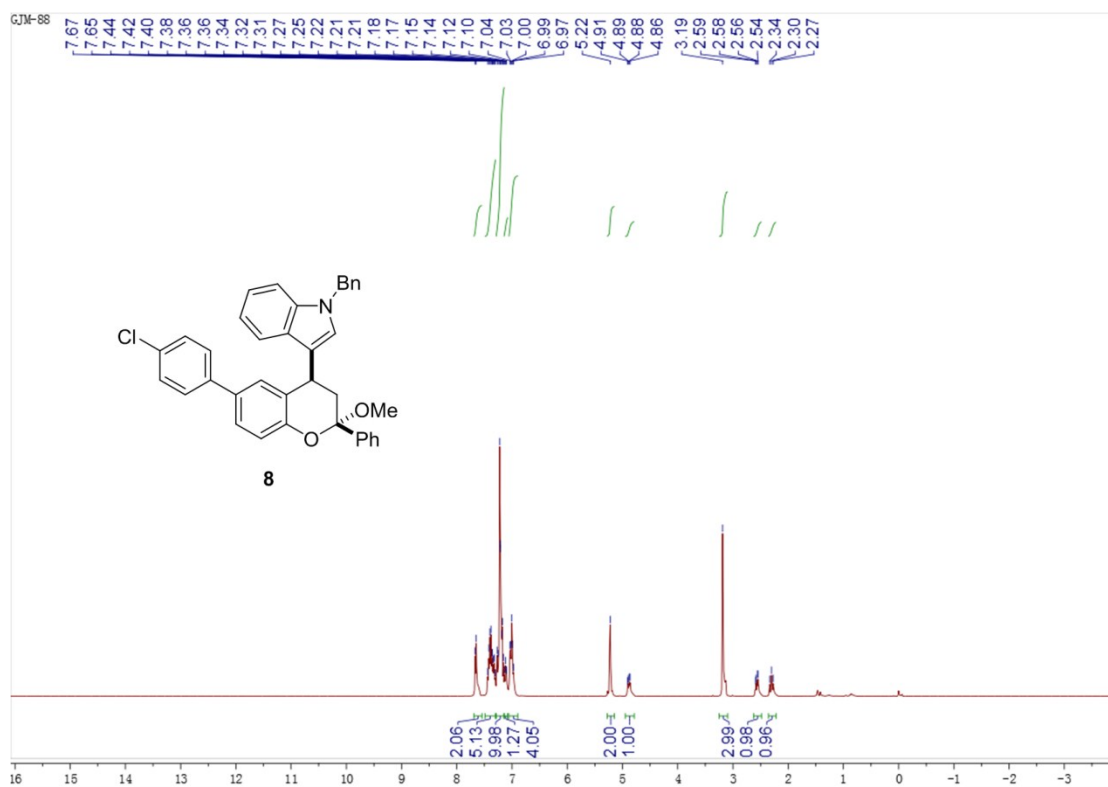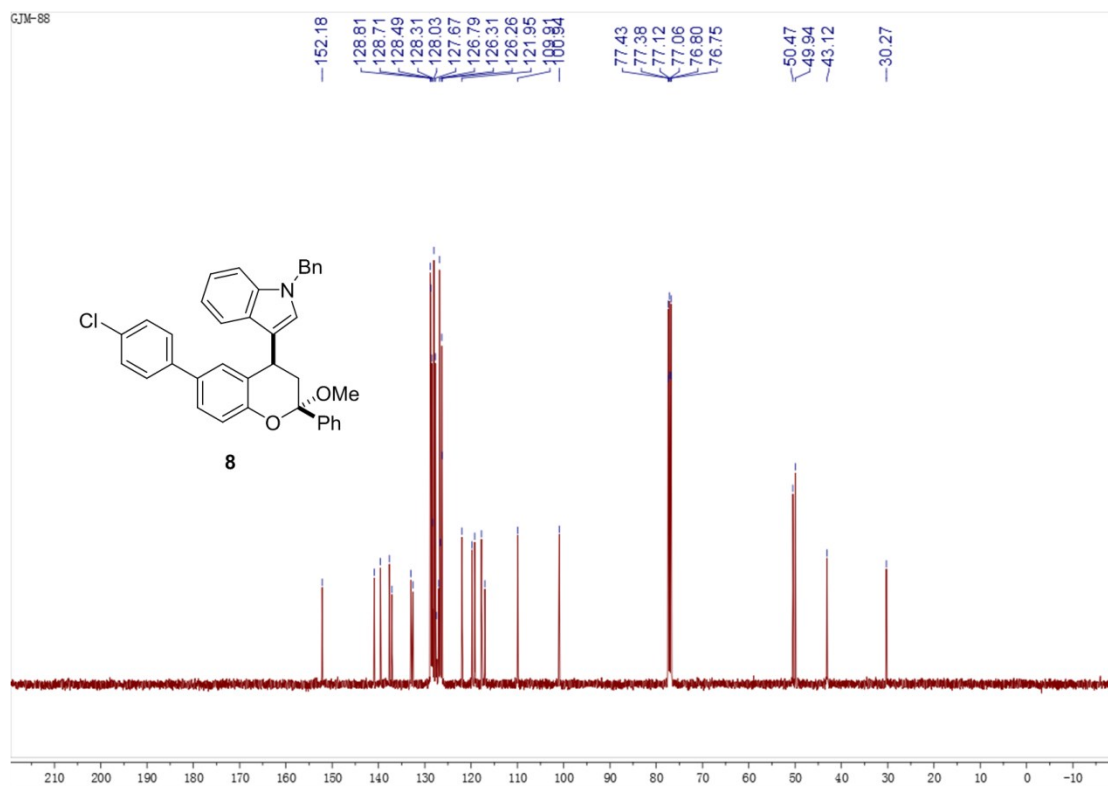

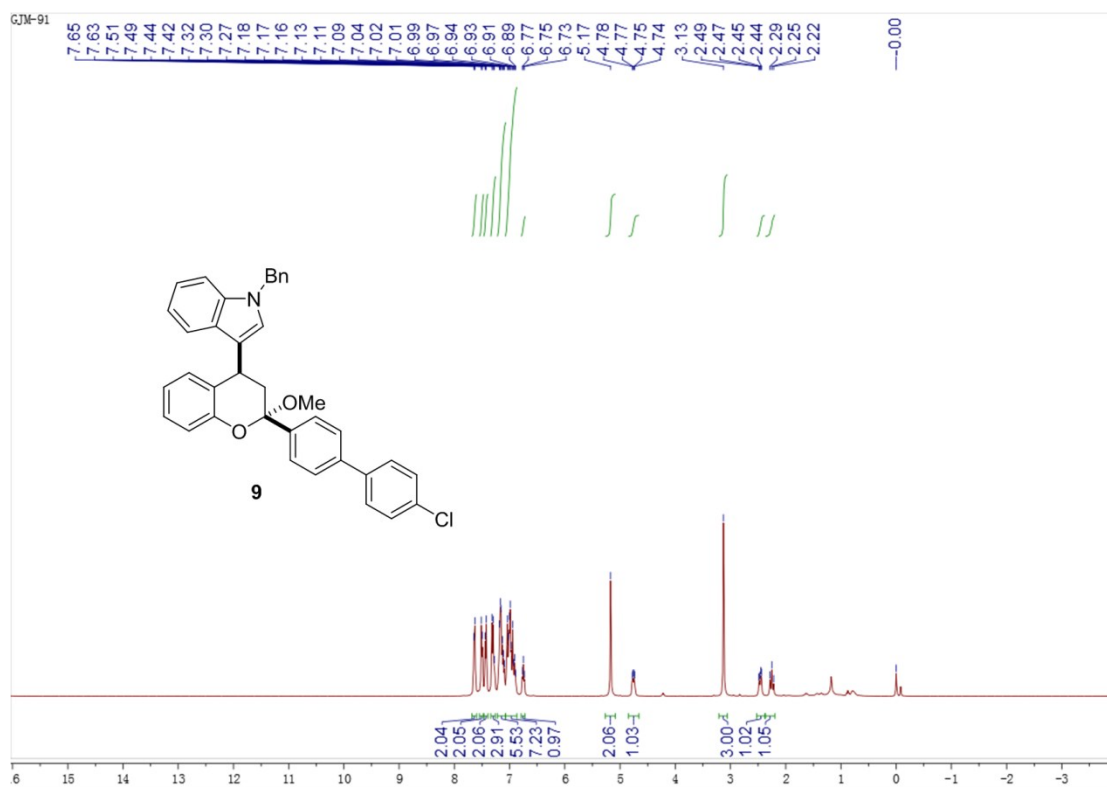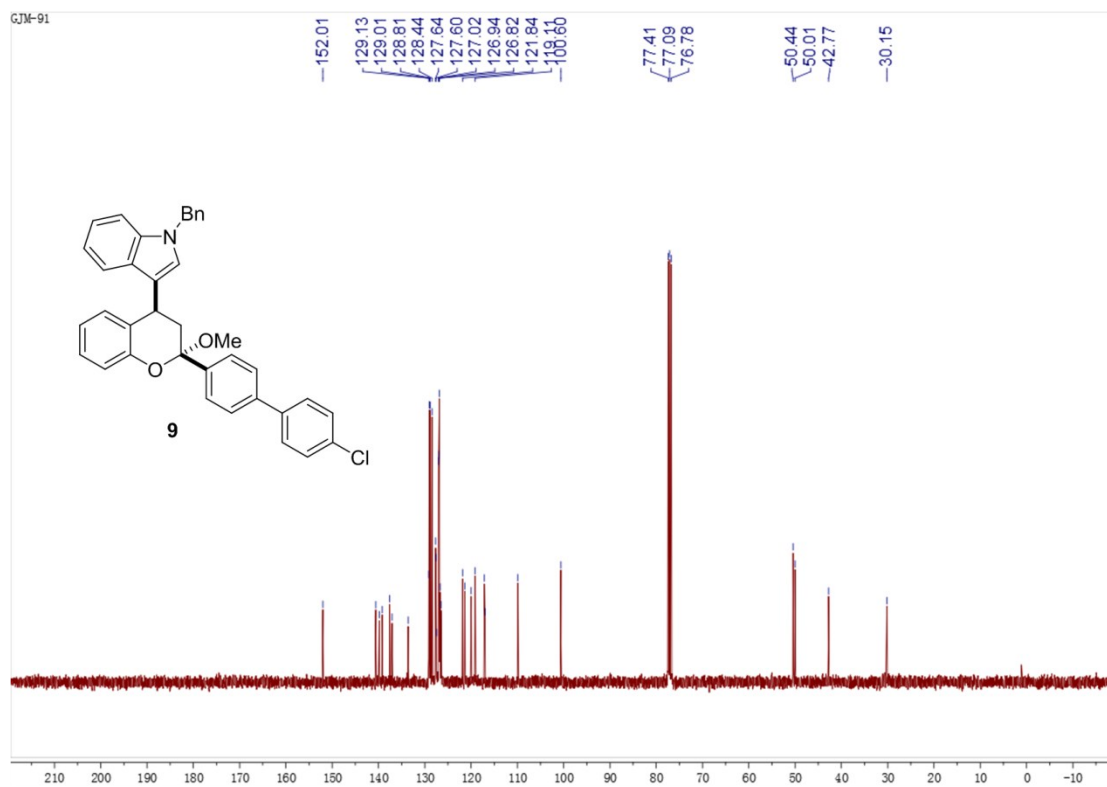

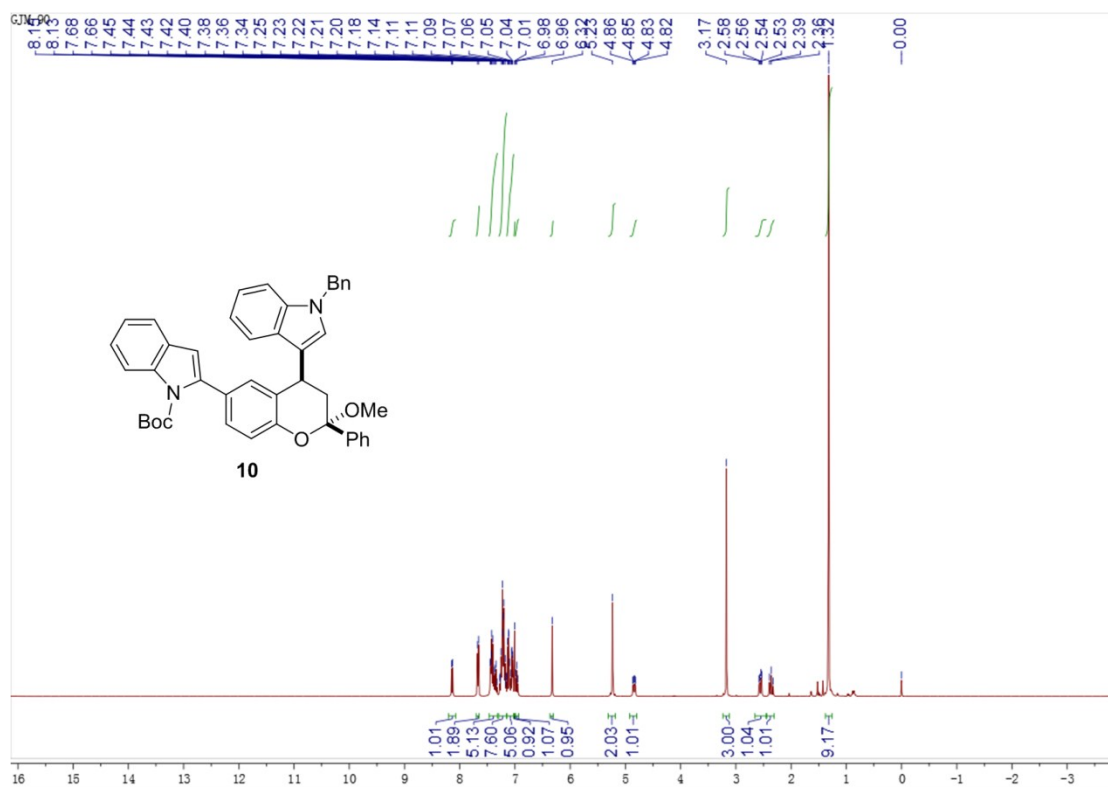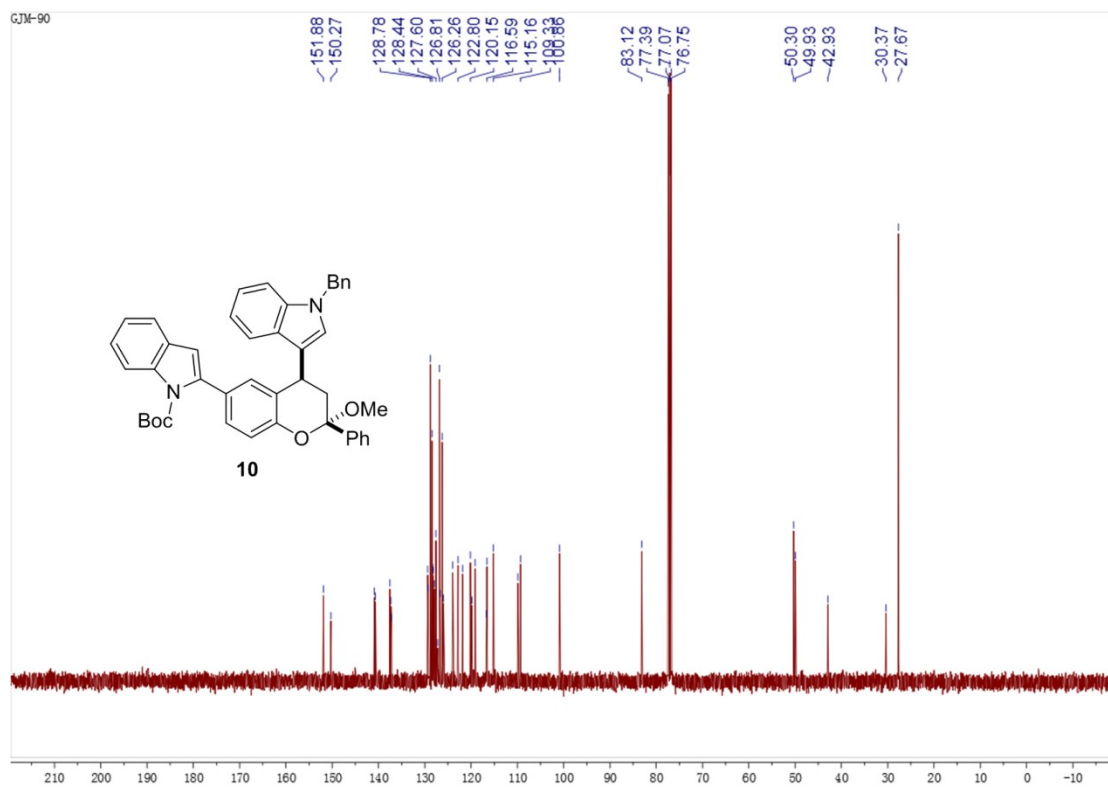

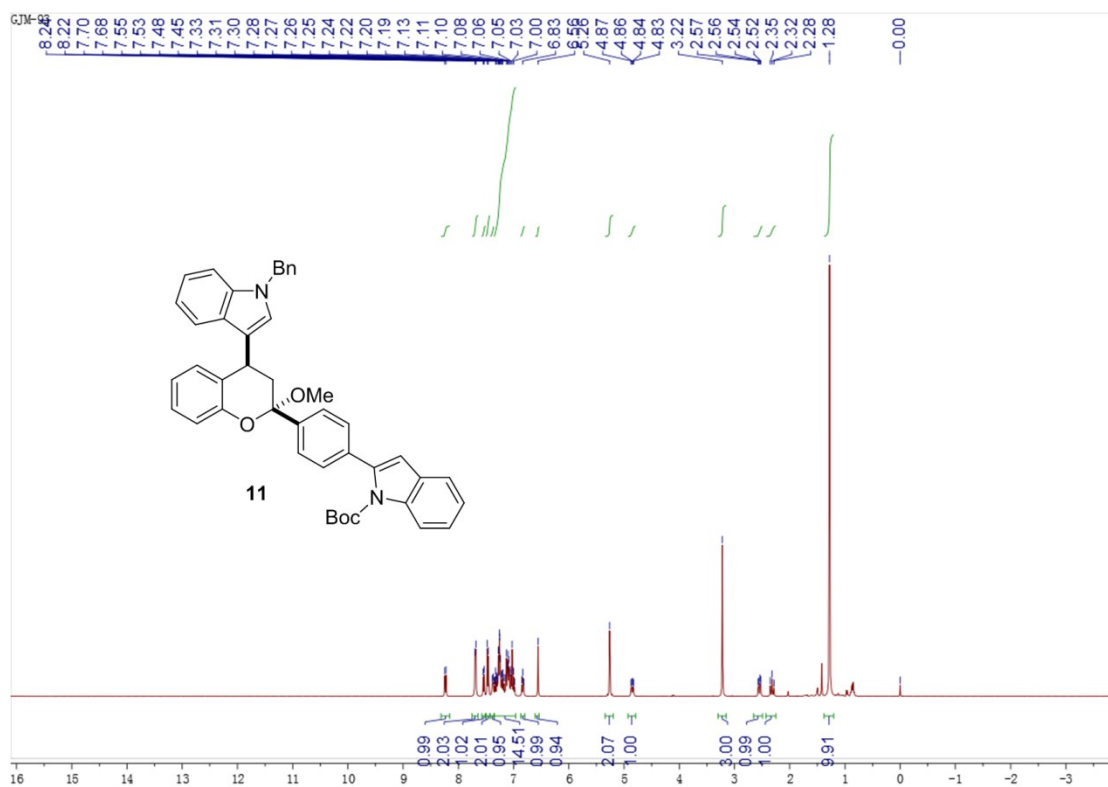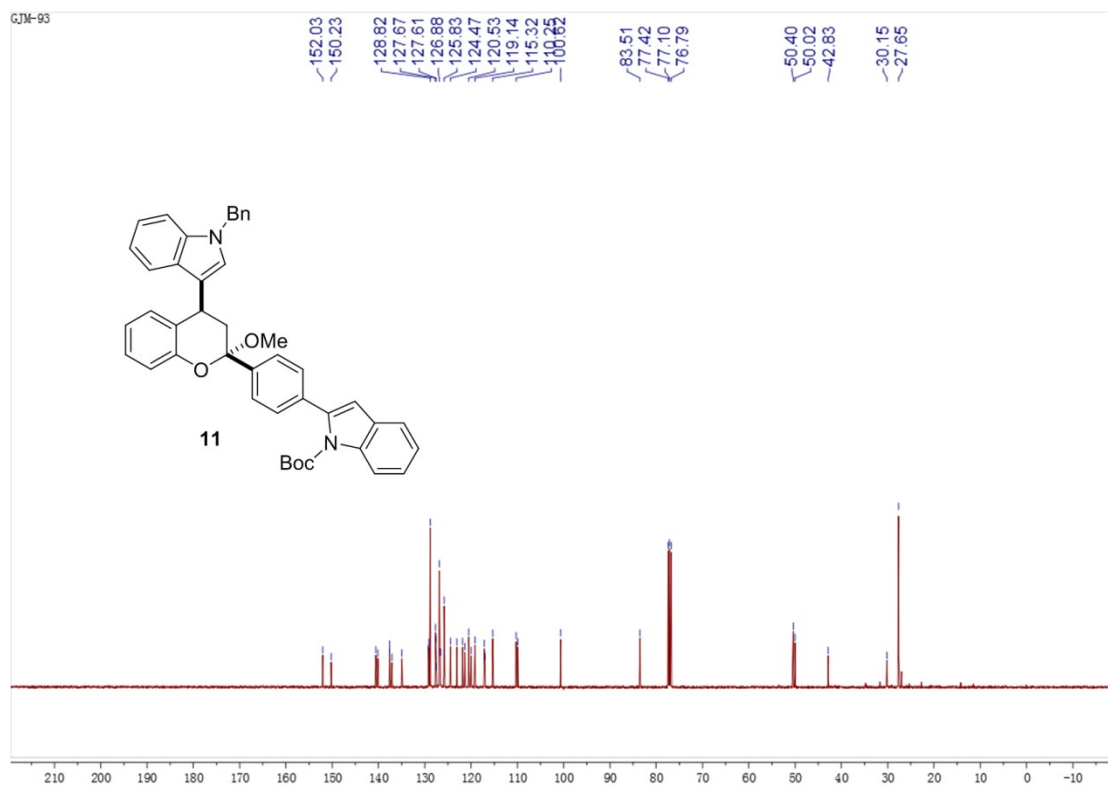

Supplement: c8ra02481b1.pdf [file c8ra02481b1.pdf]
